# Supplementary material for: Comprehensive genomic profiling of 30,000 consecutive solid tumors
Source: bioRxiv or medRxiv preprint supplement (doi:10.1101/2020.11.19.20233866), 2020-11-22
Supplement: Supplementary file [file media-1.pdf]

# **Comprehensive genomic profiling of 30,000 consecutive solid tumors**

## **SUPPLEMENTARY INFORMATION**

### **Supplementary Tables 1-10**

**Supplementary Table 1 - Nucleic acid concentrations (by specimen sample size)**

|              |              | TSA < 2 mm <sup>2</sup> |               | TSA >= 2 mm <sup>2</sup> |               | Total         |               |
|--------------|--------------|-------------------------|---------------|--------------------------|---------------|---------------|---------------|
| Nucleic Acid | Bin          | n                       | %             | n                        | %             | n             | %             |
| RNA          | < 1 ng/uL    | 1,029                   | 48.3%         | 1,025                    | 3.7%          | 2,054         | 6.9%          |
|              | >= 1 ng/uL   | 1,103                   | 51.7%         | 26,636                   | 96.3%         | 27,739        | 93.1%         |
| DNA          | < 1 ng/uL    | 1,183                   | 55.5%         | 2,772                    | 10.0%         | 3,955         | 13.3%         |
|              | >=1 ng/uL    | 949                     | 44.5%         | 24,889                   | 90.0%         | 25,838        | 86.7%         |
|              | <b>Total</b> | <b>2,132</b>            | <b>100.0%</b> | <b>27,661</b>            | <b>100.0%</b> | <b>29,793</b> | <b>100.0%</b> |

This table presents sample counts/frequencies from the overall PCR-CGP cohort broken down by nucleic acid concentration and specimen tumor surface area (TSA). Results presented here were restricted to analysis of samples with complete DNA/RNA concentration and specimen TSA info (n=29,793; 95.6% of total n=31,165). Sample counts and frequencies were calculated separately using DNA- and RNA-based nucleic acid concentrations, and both sets of summaries are presented here for comparison.

**Supplementary Table 2 - Informative/Actionable NSCLC adenocarcinoma biomarkers**

| Gene / Biomarker    | Variant Types           | Relevance |
|---------------------|-------------------------|-----------|
| <i>ALK</i>          | Fusion                  | FDA       |
| <i>BRAF</i>         | Fusion, INDEL, SNV      | FDA       |
| <i>EGFR</i>         | INDEL, SNV              | FDA       |
| <i>ERBB2</i>        | CNV, INDEL, SNV         | NCCN      |
| <i>HRAS</i>         | SNV                     | Exclusive |
| <i>KRAS</i>         | SNV                     | Exclusive |
| <i>MAP2K1</i>       | INDEL, SNV              | Exclusive |
| <i>MET</i>          | CNV, Fusion, INDEL, SNV | FDA, NCCN |
| <i>NRAS</i>         | SNV                     | Exclusive |
| <i>NRG1</i>         | Fusion                  | Exclusive |
| <i>NTRK (NTRK3)</i> | Fusion                  | FDA       |
| <i>RET</i>          | Fusion                  | FDA       |
| <i>ROS1</i>         | Fusion                  | FDA       |
| <i>TMB</i>          | TMB                     | FDA, NCCN |
| <b>Total</b>        |                         |           |

Clinically relevant biomarkers included here are those where, for patients with lung NSCLC adenocarcinoma, a positive test result is (a) associated with an FDA-approved and/or NCCN-recommended therapy (e.g., a therapy selection biomarker); or (b) thought to be mutually exclusive with known therapy selection biomarkers. Gene/biomarker labels associated with each indicated biomarker are listed in the first column, with pertinent PCR-CGP variant type(s) associated with each biomarker listed in the 'Variant Types' column. The 'Relevance' column indicates whether a given biomarker is associated with any FDA-approved therapy ('FDA'), NCCN therapy recommendation ('NCCN'), thought to be mutually exclusive with FDA-approved/NCCN-recommended therapy selection biomarkers ('Exclusive'), or a combination of these categories.

**Supplementary Table 3 - Patient Characteristics**

| <b>Characteristic</b> | <b>Attribute</b>                    | <b>n</b>      | <b>%</b>      |
|-----------------------|-------------------------------------|---------------|---------------|
| <b>Gender</b>         | Female                              | 16,493        | 54.0%         |
|                       | Male                                | 14,072        | 46.0%         |
| <b>Age</b>            | 18-29                               | 275           | 0.9%          |
|                       | 30-49                               | 3,193         | 10.4%         |
|                       | 50-69                               | 14,792        | 48.4%         |
|                       | 70-89                               | 12,302        | 40.3%         |
|                       | N/A                                 | 3             | -             |
| <b>Race</b>           | White                               | 15,146        | 73.4%         |
|                       | Black or African American           | 2,501         | 12.1%         |
|                       | Asian                               | 1,406         | 6.8%          |
|                       | Native Hawaiian or Pacific Islander | 65            | 0.3%          |
|                       | American Indian or Alaska Native    | 68            | 0.3%          |
|                       | Other                               | 1,452         | 7.0%          |
|                       | N/A                                 | 9,927         | -             |
| <b>Total</b>          |                                     | <b>30,565</b> | <b>100.0%</b> |

This table summarizes select patient characteristics for the 30,565 unique patients associated with 31,165 consecutive tissue specimens received for PCR-CGP testing. Any patients for which corresponding characteristic info was unavailable are categorized as 'N/A' for the indicated characteristic. Percentages displayed (%) reflect the frequency of patients assigned to each sub-group (e.g., attribute) within the corresponding patient characteristic. Submission of race information was not required during the study period.

Supplementary Table 4. Characteristics of 31,165 specimens received for CGP by Cancer Type

| Cancer Type       |               |               | Tumor Surface Area |                     |                       |                     | Tumor Content |              |              |              | Sample Age (yrs) |              |              |             |
|-------------------|---------------|---------------|--------------------|---------------------|-----------------------|---------------------|---------------|--------------|--------------|--------------|------------------|--------------|--------------|-------------|
| Cancer Type       | Total n       | %             | <2 mm <sup>2</sup> | 2-9 mm <sup>2</sup> | 10-24 mm <sup>2</sup> | ≥25 mm <sup>2</sup> | 0-19%         | 20-39%       | 40-59%       | ≥60%         | <1               | 1-2          | 2-5          | >5          |
| Lung - NSCLC      | 4457          | 14.3%         | 13.9%              | 50.9%               | 11.6%                 | 23.6%               | 18.4%         | 31.1%        | 28.5%        | 22.0%        | 86.2%            | 7.2%         | 5.5%         | 1.2%        |
| Breast            | 3713          | 11.9%         | 5.7%               | 36.0%               | 20.5%                 | 37.8%               | 7.0%          | 16.3%        | 27.7%        | 49.0%        | 64.2%            | 12.3%        | 16.5%        | 7.0%        |
| Colon and Rectum  | 3700          | 11.9%         | 5.2%               | 38.4%               | 12.3%                 | 44.0%               | 7.2%          | 23.0%        | 35.6%        | 34.2%        | 71.8%            | 13.9%        | 12.2%        | 2.2%        |
| Prostate          | 2045          | 6.6%          | 4.5%               | 42.4%               | 23.9%                 | 29.1%               | 6.1%          | 19.5%        | 32.6%        | 41.8%        | 53.2%            | 12.8%        | 19.5%        | 14.6%       |
| Pancreas          | 1955          | 6.3%          | 12.4%              | 46.1%               | 14.2%                 | 27.2%               | 29.5%         | 34.0%        | 22.4%        | 14.1%        | 82.8%            | 10.4%        | 5.6%         | 1.3%        |
| Ovary             | 1857          | 6.0%          | 2.4%               | 20.0%               | 10.3%                 | 67.2%               | 8.7%          | 16.2%        | 24.3%        | 50.7%        | 58.6%            | 16.1%        | 19.3%        | 6.0%        |
| Unknown Primary   | 1513          | 4.9%          | 13.8%              | 51.7%               | 14.9%                 | 19.6%               | 14.3%         | 22.2%        | 27.5%        | 36.0%        | 92.7%            | 4.2%         | 2.6%         | 0.5%        |
| Other             | 1500          | 4.8%          | 3.1%               | 31.2%               | 14.8%                 | 50.9%               | 8.3%          | 16.0%        | 22.9%        | 52.8%        | 71.2%            | 12.1%        | 12.3%        | 4.4%        |
| Brain             | 1421          | 4.6%          | 1.4%               | 11.1%               | 7.7%                  | 79.7%               | 3.0%          | 8.2%         | 14.7%        | 74.1%        | 71.8%            | 11.0%        | 10.3%        | 6.8%        |
| Endometrium       | 1099          | 3.5%          | 4.0%               | 22.4%               | 10.1%                 | 63.5%               | 5.7%          | 17.0%        | 25.7%        | 51.6%        | 66.7%            | 16.3%        | 14.1%        | 2.9%        |
| Sarcoma           | 912           | 2.9%          | 3.0%               | 22.5%               | 13.7%                 | 60.9%               | 3.0%          | 8.1%         | 13.6%        | 75.3%        | 77.5%            | 10.0%        | 9.4%         | 3.1%        |
| Head and Neck     | 902           | 2.9%          | 4.8%               | 31.0%               | 16.8%                 | 47.5%               | 5.1%          | 17.4%        | 30.7%        | 46.8%        | 78.8%            | 12.1%        | 7.1%         | 2.0%        |
| Melanoma          | 843           | 2.7%          | 6.2%               | 32.0%               | 16.1%                 | 45.7%               | 6.9%          | 11.7%        | 18.7%        | 62.6%        | 84.0%            | 7.9%         | 7.0%         | 1.1%        |
| Esophagus         | 789           | 2.5%          | 6.6%               | 67.5%               | 13.3%                 | 12.6%               | 8.1%          | 23.8%        | 34.9%        | 33.2%        | 85.8%            | 9.3%         | 4.8%         | 0.1%        |
| Bladder           | 734           | 2.4%          | 6.4%               | 27.1%               | 11.2%                 | 55.3%               | 5.9%          | 16.5%        | 30.0%        | 47.7%        | 81.1%            | 11.9%        | 5.9%         | 1.2%        |
| Kidney            | 678           | 2.2%          | 6.2%               | 29.6%               | 9.2%                  | 55.0%               | 6.0%          | 24.3%        | 25.4%        | 44.2%        | 68.1%            | 12.1%        | 14.9%        | 4.9%        |
| Biliary           | 633           | 2.0%          | 6.6%               | 43.0%               | 20.5%                 | 29.9%               | 19.3%         | 34.0%        | 27.0%        | 19.7%        | 82.9%            | 11.5%        | 4.9%         | 0.6%        |
| Stomach           | 574           | 1.8%          | 8.2%               | 55.2%               | 12.5%                 | 24.0%               | 23.9%         | 37.5%        | 21.4%        | 17.2%        | 83.8%            | 9.6%         | 5.7%         | 0.9%        |
| Lung - SCLC       | 533           | 1.7%          | 6.2%               | 48.9%               | 17.9%                 | 27.1%               | 6.4%          | 9.9%         | 11.8%        | 71.9%        | 86.3%            | 9.9%         | 3.6%         | 0.2%        |
| Thyroid           | 330           | 1.1%          | 3.3%               | 19.7%               | 11.8%                 | 65.2%               | 6.1%          | 9.7%         | 20.3%        | 63.9%        | 61.2%            | 12.1%        | 14.8%        | 11.8%       |
| Lymphoma          | 255           | 0.8%          | 6.4%               | 32.0%               | 21.2%                 | 40.4%               | 14.1%         | 16.5%        | 17.6%        | 51.8%        | 72.5%            | 15.3%        | 8.6%         | 3.5%        |
| Cervical          | 175           | 0.6%          | 3.4%               | 39.4%               | 14.9%                 | 42.3%               | 6.3%          | 13.7%        | 35.4%        | 44.6%        | 73.7%            | 15.4%        | 8.6%         | 2.3%        |
| Liver             | 154           | 0.5%          | 6.6%               | 44.1%               | 18.4%                 | 30.9%               | 1.9%          | 18.2%        | 24.0%        | 55.8%        | 77.9%            | 12.3%        | 7.8%         | 1.9%        |
| Non-Melanoma Skin | 151           | 0.5%          | 2.0%               | 31.1%               | 15.2%                 | 51.7%               | 2.6%          | 15.9%        | 28.5%        | 53.0%        | 84.1%            | 11.3%        | 3.3%         | 1.3%        |
| Small Intestine   | 104           | 0.3%          | 3.8%               | 36.5%               | 9.6%                  | 50.0%               | 13.5%         | 27.9%        | 33.7%        | 25.0%        | 77.9%            | 11.5%        | 10.6%        | 0.0%        |
| Thymus            | 52            | 0.2%          | 7.7%               | 32.7%               | 17.3%                 | 42.3%               | 13.5%         | 11.5%        | 32.7%        | 42.3%        | 75.0%            | 9.6%         | 11.5%        | 3.8%        |
| Meninges          | 46            | 0.1%          | 0.0%               | 6.5%                | 6.5%                  | 87.0%               | 0.0%          | 2.2%         | 4.3%         | 93.5%        | 58.7%            | 8.7%         | 19.6%        | 13.0%       |
| Adrenal           | 29            | 0.1%          | 0.0%               | 31.0%               | 17.2%                 | 51.7%               | 3.4%          | 0.0%         | 10.3%        | 86.2%        | 89.7%            | 0.0%         | 10.3%        | 0.0%        |
| Lung              | 10            | 0.0%          | 33.3%              | 50.0%               | 0.0%                  | 16.7%               | 10.0%         | 30.0%        | 30.0%        | 30.0%        | 70.0%            | 10.0%        | 10.0%        | 10.0%       |
| NSCLC             | 1             | 0.0%          | 100.0%             | 0.0%                | 0.0%                  | 0.0%                | 0.0%          | 0.0%         | 0.0%         | 100.0%       | 100.0%           | 0.0%         | 0.0%         | 0.0%        |
| <b>Total</b>      | <b>31,165</b> | <b>100.0%</b> | <b>7.0%</b>        | <b>37.7%</b>        | <b>14.5%</b>          | <b>40.8%</b>        | <b>10.7%</b>  | <b>21.1%</b> | <b>26.7%</b> | <b>41.6%</b> | <b>74.3%</b>     | <b>11.2%</b> | <b>10.6%</b> | <b>3.9%</b> |

This table summarizes count and frequency of tumor specimens in the overall PCR-CGP test cohort (n=31,165) by cancer type. For all samples from each cancer type, the relative frequency of the indicated sample characteristic groups are shown.

**Supplementary Table 5: PCR-CGP Reportability by Sample Input Requirement Characteristics**

| Specimen           |                           | Overall       |               | Reported      |              | Test Failure |              |
|--------------------|---------------------------|---------------|---------------|---------------|--------------|--------------|--------------|
| Requirement Status | Attribute                 | <i>n</i>      | %             | <i>n</i>      | %            | <i>n</i>     | %            |
| <b>Pass</b>        | TSA 2-10 mm <sup>2</sup>  | 7,944         | 25.5%         | 7,869         | 99.1%        | 75           | 0.9%         |
|                    | TSA 11-24 mm <sup>2</sup> | 3,814         | 12.3%         | 3,774         | 99.0%        | 40           | 1.0%         |
|                    | TSA >= 25 mm <sup>2</sup> | 11,264        | 36.2%         | 11,148        | 99.0%        | 116          | 1.0%         |
|                    | <b>Subtotal</b>           | <b>23,022</b> | <b>74.0%</b>  | <b>22,791</b> | <b>99.0%</b> | <b>231</b>   | <b>1.0%</b>  |
| <b>Exception</b>   | TC < 20%                  | 3,327         | 10.7%         | 2,270         | 68.2%        | 1,057        | 31.8%        |
|                    | TSA < 2 mm <sup>2</sup>   | 1,396         | 4.5%          | 1,260         | 90.3%        | 136          | 9.7%         |
|                    | Age > 5 yrs               | 1,090         | 3.5%          | 940           | 86.2%        | 150          | 13.8%        |
|                    | DNA or RNA < 1 ng/uL      | 2,266         | 7.3%          | 2,041         | 90.1%        | 225          | 9.9%         |
|                    | <b>Subtotal</b>           | <b>8,079</b>  | <b>26.0%</b>  | <b>6,511</b>  | <b>80.6%</b> | <b>1,568</b> | <b>19.4%</b> |
| <b>Total</b>       |                           | <b>31,101</b> | <b>100.0%</b> | <b>29,302</b> | <b>94.2%</b> | <b>1,799</b> | <b>5.8%</b>  |

Sample counts and PCR-CGP test reportability in 31,101 consecutively tested tissue specimens evaluable for meeting sample input requirements are shown. Overall samples counts (*n*) and frequencies (%) are stratified by sample requirement status (Pass/Exception) and indicated specimen attribute groupings. Sample requirement status indicates whether a given sample met all minimum PCR-CGP test requirements ('Pass': tumor surface area (TSA) >= 2mm<sup>2</sup>, tumor content (TC) >= 20%, sample age <= 5 years, and DNA & RNA concentration >= 1ng/uL), or failed to meet at least one of these requirements ('Exception'). For 'Pass' samples, reportability results are stratified by tumor surface area (TSA); for 'Exception' samples, individual samples are grouped by the indicated attribute rules in the following order: (1) TC < 20%; (2) TSA < 2mm<sup>2</sup>; (3) sample age > 5 years; then, (4) DNA or RNA concentration < 1ng/uL. The overall cohort was then stratified by successfully reported tests or test failures. Tests were considered successfully reported if at least one prioritized alteration was reported OR the sample passed all sequencing quality control (QC) metrics and had TC >= 20%.

Supplementary Table 6 - Sequencing QC (by sample requirement status and specimen attributes)

| Specimen        |                           | Overall       |              |                         |                             | CGP Variant Class QC Pass |                    |                       |                    |                    |
|-----------------|---------------------------|---------------|--------------|-------------------------|-----------------------------|---------------------------|--------------------|-----------------------|--------------------|--------------------|
| QC Status       | Attribute                 | n             | %            | Reported<br>(n = 7,975) | Full QC Pass<br>(n = 6,381) | Mutation<br>(n = 8,130)   | CNA<br>(n = 8,180) | Fusion<br>(n = 7,712) | MSI<br>(n = 8,118) | TMB<br>(n = 7,531) |
| Pass            | TSA 2-10 mm <sup>2</sup>  | 2,622         | 31.0%        | 99.5%                   | 91.9%                       | 99.3%                     | 99.5%              | 96.6%                 | 99.1%              | 94.7%              |
|                 | TSA 11-24 mm <sup>2</sup> | 995           | 11.8%        | 99.3%                   | 92.7%                       | 99.2%                     | 99.3%              | 96.5%                 | 99.1%              | 95.3%              |
|                 | TSA >= 25 mm <sup>2</sup> | 2,782         | 32.9%        | 98.7%                   | 93.6%                       | 99.1%                     | 99.5%              | 96.3%                 | 99.1%              | 96.9%              |
|                 | <b>Subtotal</b>           | <b>6,399</b>  | <b>75.7%</b> | <b>99.1%</b>            | <b>92.8%</b>                | <b>99.2%</b>              | <b>99.4%</b>       | <b>96.4%</b>          | <b>99.1%</b>       | <b>95.7%</b>       |
| Exception       | TC < 20%*                 | 947           | 11.2%        | 69.8%                   | 0.0%                        | 90.1%                     | 90.2%              | 78.0%                 | 89.8%              | 75.1%              |
|                 | TSA < 2 mm <sup>2</sup>   | 495           | 5.9%         | 90.1%                   | 44.4%                       | 86.1%                     | 86.3%              | 72.1%                 | 86.5%              | 62.6%              |
|                 | Age > 5 yrs               | 263           | 3.1%         | 82.5%                   | 50.6%                       | 82.5%                     | 88.2%              | 67.7%                 | 82.1%              | 70.3%              |
|                 | DNA or RNA < 1 ng/uL      | 354           | 4.2%         | 87.6%                   | 26.0%                       | 80.5%                     | 85.9%              | 75.4%                 | 79.9%              | 55.9%              |
| <b>Subtotal</b> | <b>2,059</b>              | <b>24.3%</b>  | <b>79.4%</b> | <b>21.6%</b>            | <b>86.5%</b>                | <b>88.2%</b>              | <b>74.8%</b>       | <b>86.3%</b>          | <b>68.2%</b>       |                    |
| <b>Total</b>    | <b>8,458</b>              | <b>100.0%</b> | <b>94.3%</b> | <b>75.4%</b>            | <b>96.1%</b>                | <b>96.7%</b>              | <b>91.2%</b>       | <b>96.0%</b>          | <b>89.0%</b>       |                    |

This table summarizes sequencing quality control (QC) performance across a subset of samples from the overall PCR-CGP sequencing cohort profiled between January 1, 2020 and June 25, 2020 (n=8,458). Sequencing QC performance is summarized by sample requirement status (Pass/Exception) and indicated specimen attribute groupings, with frequency of successfully reported samples presented separately for each requirement/attribute group. Here, sample requirement status indicates whether a given sample met all minimum PCR-CGP test requirements ('Pass'; minimum PCR-CGP test requirements include: tumor surface area (TSA) >= 2mm<sup>2</sup>, tumor content (TC) >= 20%, sample age <= 5 years, and DNA & RNA concentration >= 1ng/uL), or failed to meet at least one of these requirements ('Exception'). For 'Pass' samples, sequencing QC (as well as reportability) results are broken down by TSA; for 'Exception' samples, individual samples are grouped by the indicated attribute rules in the following order: (1) TC < 20%; (2) TSA < 2mm<sup>2</sup>; (3) sample age > 5 years; then, (4) DNA or RNA concentration < 1ng/uL. For each indicated requirement/attribute combination, sample counts and relative contribution (%) to the sample set is presented in the first 2 columns of this table's 'Overall' section. Within the 'Overall' section, the 'Reported' column indicates the percentage of samples in the corresponding requirement/attribute bucket with a successfully reported test. Tests were considered successfully reported if at least one prioritized alteration was reported OR the sample passed all sequencing quality control (QC) metrics and had TC >= 20%. The 'Full QC Pass' column indicates the percentage of samples in the requirement/attribute bucket that passed all PCR-CGP variant class-specific sequencing QC assessment checks (includes QC checks specific to: point mutations or short insertions/deletions (Mutation); copy-number alterations (CNA); gene fusions (Fusion); microsatellite instability (MSI); and tumor mutation burden (TMB)). Within the 'CGP Variant Class' section of the table, variant class-specific sequencing QC 'pass' rates are presented across indicated requirement/attribute buckets. Each column in the 'CGP Variant Class' section reflects a separate variant class QC check routinely performed on each sample tested via PCR-CGP, with column headers reflecting the pertinent variant class (i.e., 'MSI') and number of samples passing that particular QC check across the full sample subset (i.e., '(n=8,118)'). \*TC >= 20% is a QC metric for all variant classes and thus is equivalent to a QC fail for all variants (reflected in the 0% Full QC Pass rate); in the variant class QC pass metrics it was not applied to isolate the impact of TC on other QC metrics.

Supplementary Table 7 - PCR-CGP vs MSK-IMPACT Biomarker Frequencies

| Cancer Type   | Gene   | Variant Type | PCR-CGP             |                    |                     |                 | MSK-IMPACT          |                    |                     |                 |
|---------------|--------|--------------|---------------------|--------------------|---------------------|-----------------|---------------------|--------------------|---------------------|-----------------|
|               |        |              | Variant<br><i>n</i> | Sample<br><i>n</i> | Cancer Type<br>Freq | Overall<br>Freq | Variant<br><i>n</i> | Sample<br><i>n</i> | Cancer Type<br>Freq | Overall<br>Freq |
| Biliary_Liver | AKT1   | MUT          | 0                   | 558                | 0.00000             | 0.01026         | 1                   | 343                | 0.00292             | 0.01045         |
| Biliary_Liver | ALK    | AMP          | 0                   | 558                | 0.00000             | 0.00018         | 0                   | 343                | 0.00000             | 0.00039         |
| Biliary_Liver | ALK    | FUSION       | 0                   | 558                | 0.00000             | 0.00570         | 0                   | 343                | 0.00000             | 0.00474         |
| Biliary_Liver | ALK    | MUT          | 0                   | 558                | 0.00000             | 0.00061         | 0                   | 343                | 0.00000             | 0.00184         |
| Biliary_Liver | AR     | AMP          | 0                   | 558                | 0.00000             | 0.00601         | 0                   | 343                | 0.00000             | 0.00842         |
| Biliary_Liver | AR     | MUT          | 0                   | 558                | 0.00000             | 0.00136         | 0                   | 343                | 0.00000             | 0.00213         |
| Biliary_Liver | ARAF   | MUT          | 1                   | 558                | 0.00179             | 0.00039         | 1                   | 343                | 0.00292             | 0.00068         |
| Biliary_Liver | BRAF   | AMP          | 1                   | 558                | 0.00179             | 0.00250         | 0                   | 343                | 0.00000             | 0.00164         |
| Biliary_Liver | BRAF   | FUSION       | 0                   | 558                | 0.00000             | 0.00118         | 1                   | 343                | 0.00292             | 0.00368         |
| Biliary_Liver | BRAF   | MUT          | 12                  | 558                | 0.02151             | 0.04106         | 7                   | 343                | 0.02041             | 0.04247         |
| Biliary_Liver | CCND1  | AMP          | 15                  | 558                | 0.02688             | 0.04299         | 11                  | 343                | 0.03207             | 0.04189         |
| Biliary_Liver | CDK4   | AMP          | 6                   | 558                | 0.01075             | 0.01921         | 3                   | 343                | 0.00875             | 0.02632         |
| Biliary_Liver | CDK4   | MUT          | 1                   | 558                | 0.00179             | 0.00061         | 0                   | 343                | 0.00000             | 0.00116         |
| Biliary_Liver | CDK6   | AMP          | 4                   | 558                | 0.00717             | 0.00697         | 3                   | 343                | 0.00875             | 0.00590         |
| Biliary_Liver | CDKN2A | HOMDEL       | 95                  | 558                | 0.17025             | 0.12234         | 23                  | 343                | 0.06706             | 0.07498         |
| Biliary_Liver | CDKN2A | MUT          | 31                  | 558                | 0.05556             | 0.04917         | 6                   | 343                | 0.01749             | 0.03599         |
| Biliary_Liver | CTNNB1 | MUT          | 39                  | 558                | 0.06989             | 0.02601         | 36                  | 343                | 0.10496             | 0.02254         |
| Biliary_Liver | EGFR   | AMP          | 4                   | 558                | 0.00717             | 0.02996         | 4                   | 343                | 0.01166             | 0.03154         |
| Biliary_Liver | EGFR   | MUT          | 0                   | 558                | 0.00000             | 0.02649         | 1                   | 343                | 0.00292             | 0.04112         |
| Biliary_Liver | ERBB2  | AMP          | 26                  | 558                | 0.04659             | 0.03202         | 10                  | 343                | 0.02915             | 0.03938         |
| Biliary_Liver | ERBB2  | MUT          | 14                  | 558                | 0.02509             | 0.01689         | 3                   | 343                | 0.00875             | 0.01945         |
| Biliary_Liver | ERBB3  | MUT          | 1                   | 558                | 0.00179             | 0.00561         | 5                   | 343                | 0.01458             | 0.00987         |
| Biliary_Liver | ERBB4  | MUT          | 0                   | 558                | 0.00000             | 0.00022         | 0                   | 343                | 0.00000             | 0.00155         |
| Biliary_Liver | ESR1   | MUT          | 0                   | 558                | 0.00000             | 0.00965         | 0                   | 343                | 0.00000             | 0.01006         |
| Biliary_Liver | EZH2   | MUT          | 0                   | 558                | 0.00000             | 0.00140         | 1                   | 343                | 0.00292             | 0.00281         |
| Biliary_Liver | FGFR1  | AMP          | 4                   | 558                | 0.00717             | 0.02816         | 1                   | 343                | 0.00292             | 0.02554         |
| Biliary_Liver | FGFR1  | FUSION       | 0                   | 558                | 0.00000             | 0.00013         | 0                   | 343                | 0.00000             | 0.00039         |
| Biliary_Liver | FGFR2  | AMP          | 1                   | 558                | 0.00179             | 0.00347         | 1                   | 343                | 0.00292             | 0.00358         |
| Biliary_Liver | FGFR2  | FUSION       | 10                  | 558                | 0.01792             | 0.00083         | 22                  | 343                | 0.06414             | 0.00300         |
| Biliary_Liver | FGFR2  | MUT          | 6                   | 558                | 0.01075             | 0.00531         | 2                   | 343                | 0.00583             | 0.00435         |
| Biliary_Liver | FGFR3  | AMP          | 6                   | 558                | 0.01075             | 0.00263         | 7                   | 343                | 0.02041             | 0.00387         |
| Biliary_Liver | FGFR3  | FUSION       | 1                   | 558                | 0.00179             | 0.00294         | 1                   | 343                | 0.00292             | 0.00271         |
| Biliary_Liver | FGFR3  | MUT          | 1                   | 558                | 0.00179             | 0.00588         | 0                   | 343                | 0.00000             | 0.01200         |
| Biliary_Liver | FGFR4  | AMP          | 2                   | 558                | 0.00358             | 0.00075         | 1                   | 343                | 0.00292             | 0.00252         |
| Biliary_Liver | GNA11  | MUT          | 0                   | 558                | 0.00000             | 0.00105         | 0                   | 343                | 0.00000             | 0.00184         |
| Biliary_Liver | GNAQ   | MUT          | 0                   | 558                | 0.00000             | 0.00096         | 0                   | 343                | 0.00000             | 0.00281         |
| Biliary_Liver | HRAS   | MUT          | 0                   | 558                | 0.00000             | 0.00504         | 0                   | 343                | 0.00000             | 0.00658         |
| Biliary_Liver | IDH1   | MUT          | 56                  | 558                | 0.10036             | 0.01776         | 46                  | 343                | 0.13411             | 0.02351         |
| Biliary_Liver | IDH2   | MUT          | 18                  | 558                | 0.03226             | 0.00281         | 5                   | 343                | 0.01458             | 0.00290         |
| Biliary_Liver | JAK1   | MUT          | 2                   | 558                | 0.00358             | 0.00026         | 8                   | 343                | 0.02332             | 0.00755         |
| Biliary_Liver | JAK2   | MUT          | 1                   | 558                | 0.00179             | 0.00066         | 0                   | 343                | 0.00000             | 0.00019         |
| Biliary_Liver | KIT    | AMP          | 1                   | 558                | 0.00179             | 0.00675         | 0                   | 343                | 0.00000             | 0.00832         |
| Biliary_Liver | KIT    | MUT          | 0                   | 558                | 0.00000             | 0.00675         | 1                   | 343                | 0.00292             | 0.01335         |
| Biliary_Liver | KRAS   | AMP          | 14                  | 558                | 0.02509             | 0.01614         | 2                   | 343                | 0.00583             | 0.01809         |
| Biliary_Liver | KRAS   | MUT          | 71                  | 558                | 0.12724             | 0.17580         | 29                  | 343                | 0.08455             | 0.15257         |
| Biliary_Liver | MAP2K1 | MUT          | 3                   | 558                | 0.00538             | 0.00412         | 3                   | 343                | 0.00875             | 0.00629         |
| Biliary_Liver | MAP2K2 | MUT          | 0                   | 558                | 0.00000             | 0.00022         | 0                   | 343                | 0.00000             | 0.00058         |
| Biliary_Liver | MAP2K4 | MUT          | 0                   | 558                | 0.00000             | 0.00092         | 1                   | 343                | 0.00292             | 0.00687         |
| Biliary_Liver | MAPK1  | MUT          | 0                   | 558                | 0.00000             | 0.00079         | 0                   | 343                | 0.00000             | 0.00116         |
| Biliary_Liver | MDM2   | AMP          | 22                  | 558                | 0.03943             | 0.02772         | 15                  | 343                | 0.04373             | 0.03696         |
| Biliary_Liver | MET    | AMP          | 8                   | 558                | 0.01434             | 0.00693         | 2                   | 343                | 0.00583             | 0.00948         |
| Biliary_Liver | MET    | MUT          | 1                   | 558                | 0.00179             | 0.00355         | 0                   | 343                | 0.00000             | 0.00300         |
| Biliary_Liver | MTOR   | MUT          | 0                   | 558                | 0.00000             | 0.00390         | 0                   | 343                | 0.00000             | 0.00619         |
| Biliary_Liver | MYC    | AMP          | 19                  | 558                | 0.03405             | 0.04066         | 9                   | 343                | 0.02624             | 0.03957         |
| Biliary_Liver | MYCN   | AMP          | 1                   | 558                | 0.00179             | 0.00325         | 1                   | 343                | 0.00292             | 0.00484         |
| Biliary_Liver | MYD88  | MUT          | 1                   | 558                | 0.00179             | 0.00118         | 0                   | 343                | 0.00000             | 0.00145         |
| Biliary_Liver | NOTCH1 | FUSION       | 0                   | 558                | 0.00000             | 0.00018         | 0                   | 343                | 0.00000             | 0.00048         |
| Biliary_Liver | NRAS   | MUT          | 16                  | 558                | 0.02867             | 0.02048         | 7                   | 343                | 0.02041             | 0.02070         |
| Biliary_Liver | NRG1   | FUSION       | 0                   | 558                | 0.00000             | 0.00039         | 0                   | 343                | 0.00000             | 0.00039         |
| Biliary_Liver | NTRK1  | FUSION       | 0                   | 558                | 0.00000             | 0.00026         | 1                   | 343                | 0.00292             | 0.00097         |
| Biliary_Liver | NTRK3  | FUSION       | 0                   | 558                | 0.00000             | 0.00066         | 0                   | 343                | 0.00000             | 0.00097         |
| Biliary_Liver | PDGFRA | AMP          | 1                   | 558                | 0.00179             | 0.00627         | 0                   | 343                | 0.00000             | 0.00851         |
| Biliary_Liver | PDGFRA | MUT          | 0                   | 558                | 0.00000             | 0.00048         | 0                   | 343                | 0.00000             | 0.00223         |
| Biliary_Liver | PIK3CA | AMP          | 1                   | 558                | 0.00179             | 0.02298         | 3                   | 343                | 0.00875             | 0.00697         |
| Biliary_Liver | PIK3CA | MUT          | 30                  | 558                | 0.05376             | 0.12387         | 13                  | 343                | 0.03790             | 0.11474         |
| Biliary_Liver | POLE   | MUT          | 0                   | 558                | 0.00000             | 0.00079         | 0                   | 343                | 0.00000             | 0.00252         |
| Biliary_Liver | PRKACA | FUSION       | 7                   | 558                | 0.01254             | 0.00039         | 9                   | 343                | 0.02624             | 0.00087         |
| Biliary_Liver | PTEN   | HOMDEL       | 5                   | 558                | 0.00896             | 0.03228         | 5                   | 343                | 0.01458             | 0.02390         |
| Biliary_Liver | PTEN   | MUT          | 12                  | 558                | 0.02151             | 0.06536         | 5                   | 343                | 0.01458             | 0.05563         |



|               |        |        |     |     |         |         |     |     |         |         |
|---------------|--------|--------|-----|-----|---------|---------|-----|-----|---------|---------|
| Biliary_Liver | RAF1   | MUT    | 4   | 558 | 0.00717 | 0.00154 | 2   | 343 | 0.00583 | 0.00261 |
| Biliary_Liver | RB1    | HOMDEL | 6   | 558 | 0.01075 | 0.02298 | 4   | 343 | 0.01166 | 0.01896 |
| Biliary_Liver | RB1    | MUT    | 8   | 558 | 0.01434 | 0.04053 | 6   | 343 | 0.01749 | 0.04092 |
| Biliary_Liver | RET    | FUSION | 0   | 558 | 0.00000 | 0.00219 | 0   | 343 | 0.00000 | 0.00281 |
| Biliary_Liver | RET    | MUT    | 0   | 558 | 0.00000 | 0.00175 | 0   | 343 | 0.00000 | 0.00213 |
| Biliary_Liver | RIT1   | MUT    | 0   | 558 | 0.00000 | 0.00105 | 2   | 343 | 0.00583 | 0.00126 |
| Biliary_Liver | ROS1   | FUSION | 0   | 558 | 0.00000 | 0.00149 | 0   | 343 | 0.00000 | 0.00358 |
| Biliary_Liver | ROS1   | MUT    | 0   | 558 | 0.00000 | 0.00009 | 0   | 343 | 0.00000 | 0.00019 |
| Biliary_Liver | SF3B1  | MUT    | 13  | 558 | 0.02330 | 0.00807 | 4   | 343 | 0.01166 | 0.00803 |
| Biliary_Liver | SMO    | MUT    | 0   | 558 | 0.00000 | 0.00013 | 0   | 343 | 0.00000 | 0.00039 |
| Biliary_Liver | SPOP   | MUT    | 0   | 558 | 0.00000 | 0.00355 | 0   | 343 | 0.00000 | 0.00793 |
| Biliary_Liver | TERT   | FUSION | 0   | 558 | 0.00000 | 0.00009 | 0   | 343 | 0.00000 | 0.00000 |
| Biliary_Liver | TERT   | MUT    | 78  | 558 | 0.13978 | 0.09795 | 44  | 343 | 0.12828 | 0.12307 |
| Biliary_Liver | TP53   | HOMDEL | 4   | 558 | 0.00717 | 0.01276 | 2   | 343 | 0.00583 | 0.00900 |
| Biliary_Liver | TP53   | MUT    | 198 | 558 | 0.35484 | 0.52404 | 90  | 343 | 0.26239 | 0.41428 |
| Bladder       | AKT1   | MUT    | 5   | 614 | 0.00814 | 0.01026 | 3   | 402 | 0.00746 | 0.01045 |
| Bladder       | ALK    | AMP    | 1   | 614 | 0.00163 | 0.00018 | 0   | 402 | 0.00000 | 0.00039 |
| Bladder       | ALK    | FUSION | 0   | 614 | 0.00000 | 0.00570 | 0   | 402 | 0.00000 | 0.00474 |
| Bladder       | ALK    | MUT    | 0   | 614 | 0.00000 | 0.00061 | 0   | 402 | 0.00000 | 0.00184 |
| Bladder       | AR     | AMP    | 0   | 614 | 0.00000 | 0.00601 | 0   | 402 | 0.00000 | 0.00842 |
| Bladder       | AR     | MUT    | 1   | 614 | 0.00163 | 0.00136 | 0   | 402 | 0.00000 | 0.00213 |
| Bladder       | ARAF   | MUT    | 0   | 614 | 0.00000 | 0.00039 | 0   | 402 | 0.00000 | 0.00068 |
| Bladder       | BRAF   | AMP    | 1   | 614 | 0.00163 | 0.00250 | 1   | 402 | 0.00249 | 0.00164 |
| Bladder       | BRAF   | FUSION | 1   | 614 | 0.00163 | 0.00118 | 0   | 402 | 0.00000 | 0.00368 |
| Bladder       | BRAF   | MUT    | 6   | 614 | 0.00977 | 0.04106 | 10  | 402 | 0.02488 | 0.04247 |
| Bladder       | CCND1  | AMP    | 55  | 614 | 0.08958 | 0.04299 | 38  | 402 | 0.09453 | 0.04189 |
| Bladder       | CDK4   | AMP    | 11  | 614 | 0.01792 | 0.01921 | 6   | 402 | 0.01493 | 0.02632 |
| Bladder       | CDK4   | MUT    | 1   | 614 | 0.00163 | 0.00061 | 1   | 402 | 0.00249 | 0.00116 |
| Bladder       | CDK6   | AMP    | 2   | 614 | 0.00326 | 0.00697 | 1   | 402 | 0.00249 | 0.00590 |
| Bladder       | CDKN2A | HOMDEL | 150 | 614 | 0.24430 | 0.12234 | 65  | 402 | 0.16169 | 0.07498 |
| Bladder       | CDKN2A | MUT    | 35  | 614 | 0.05700 | 0.04917 | 21  | 402 | 0.05224 | 0.03599 |
| Bladder       | CTNNB1 | MUT    | 13  | 614 | 0.02117 | 0.02601 | 10  | 402 | 0.02488 | 0.02254 |
| Bladder       | EGFR   | AMP    | 14  | 614 | 0.02280 | 0.02996 | 7   | 402 | 0.01741 | 0.03154 |
| Bladder       | EGFR   | MUT    | 4   | 614 | 0.00651 | 0.02649 | 7   | 402 | 0.01741 | 0.04112 |
| Bladder       | ERBB2  | AMP    | 45  | 614 | 0.07329 | 0.03202 | 23  | 402 | 0.05721 | 0.03938 |
| Bladder       | ERBB2  | MUT    | 43  | 614 | 0.07003 | 0.01689 | 39  | 402 | 0.09701 | 0.01945 |
| Bladder       | ERBB3  | MUT    | 18  | 614 | 0.02932 | 0.00561 | 20  | 402 | 0.04975 | 0.00987 |
| Bladder       | ERBB4  | MUT    | 0   | 614 | 0.00000 | 0.00022 | 1   | 402 | 0.00249 | 0.00155 |
| Bladder       | ESR1   | MUT    | 0   | 614 | 0.00000 | 0.00965 | 0   | 402 | 0.00000 | 0.01006 |
| Bladder       | EZH2   | MUT    | 0   | 614 | 0.00000 | 0.00140 | 2   | 402 | 0.00498 | 0.00281 |
| Bladder       | FGFR1  | AMP    | 10  | 614 | 0.01629 | 0.02816 | 7   | 402 | 0.01741 | 0.02554 |
| Bladder       | FGFR1  | FUSION | 0   | 614 | 0.00000 | 0.00013 | 0   | 402 | 0.00000 | 0.00039 |
| Bladder       | FGFR2  | AMP    | 2   | 614 | 0.00326 | 0.00347 | 1   | 402 | 0.00249 | 0.00358 |
| Bladder       | FGFR2  | FUSION | 0   | 614 | 0.00000 | 0.00083 | 0   | 402 | 0.00000 | 0.00300 |
| Bladder       | FGFR2  | MUT    | 2   | 614 | 0.00326 | 0.00531 | 6   | 402 | 0.01493 | 0.00435 |
| Bladder       | FGFR3  | AMP    | 5   | 614 | 0.00814 | 0.00263 | 4   | 402 | 0.00995 | 0.00387 |
| Bladder       | FGFR3  | FUSION | 18  | 614 | 0.02932 | 0.00294 | 5   | 402 | 0.01244 | 0.00271 |
| Bladder       | FGFR3  | MUT    | 88  | 614 | 0.14332 | 0.00588 | 106 | 402 | 0.26368 | 0.01200 |
| Bladder       | FGFR4  | AMP    | 0   | 614 | 0.00000 | 0.00075 | 0   | 402 | 0.00000 | 0.00252 |
| Bladder       | GNA11  | MUT    | 0   | 614 | 0.00000 | 0.00105 | 0   | 402 | 0.00000 | 0.00184 |
| Bladder       | GNAQ   | MUT    | 0   | 614 | 0.00000 | 0.00096 | 0   | 402 | 0.00000 | 0.00281 |
| Bladder       | HRAS   | MUT    | 17  | 614 | 0.02769 | 0.00504 | 15  | 402 | 0.03731 | 0.00658 |
| Bladder       | IDH1   | MUT    | 0   | 614 | 0.00000 | 0.01776 | 0   | 402 | 0.00000 | 0.02351 |
| Bladder       | IDH2   | MUT    | 1   | 614 | 0.00163 | 0.00281 | 0   | 402 | 0.00000 | 0.00290 |
| Bladder       | JAK1   | MUT    | 0   | 614 | 0.00000 | 0.00026 | 3   | 402 | 0.00746 | 0.00755 |
| Bladder       | JAK2   | MUT    | 0   | 614 | 0.00000 | 0.00066 | 1   | 402 | 0.00249 | 0.00019 |
| Bladder       | KIT    | AMP    | 4   | 614 | 0.00651 | 0.00675 | 0   | 402 | 0.00000 | 0.00832 |
| Bladder       | KIT    | MUT    | 0   | 614 | 0.00000 | 0.00675 | 0   | 402 | 0.00000 | 0.01335 |
| Bladder       | KRAS   | AMP    | 1   | 614 | 0.00163 | 0.01614 | 4   | 402 | 0.00995 | 0.01809 |
| Bladder       | KRAS   | MUT    | 26  | 614 | 0.04235 | 0.17580 | 26  | 402 | 0.06468 | 0.15257 |
| Bladder       | MAP2K1 | MUT    | 1   | 614 | 0.00163 | 0.00412 | 2   | 402 | 0.00498 | 0.00629 |
| Bladder       | MAP2K2 | MUT    | 0   | 614 | 0.00000 | 0.00022 | 0   | 402 | 0.00000 | 0.00058 |
| Bladder       | MAP2K4 | MUT    | 0   | 614 | 0.00000 | 0.00092 | 1   | 402 | 0.00249 | 0.00687 |
| Bladder       | MAPK1  | MUT    | 1   | 614 | 0.00163 | 0.00079 | 4   | 402 | 0.00995 | 0.00116 |
| Bladder       | MDM2   | AMP    | 46  | 614 | 0.07492 | 0.02772 | 32  | 402 | 0.07960 | 0.03696 |
| Bladder       | MET    | AMP    | 0   | 614 | 0.00000 | 0.00693 | 2   | 402 | 0.00498 | 0.00948 |
| Bladder       | MET    | MUT    | 0   | 614 | 0.00000 | 0.00355 | 1   | 402 | 0.00249 | 0.00300 |
| Bladder       | MTOR   | MUT    | 3   | 614 | 0.00489 | 0.00390 | 4   | 402 | 0.00995 | 0.00619 |
| Bladder       | MYC    | AMP    | 19  | 614 | 0.03094 | 0.04066 | 7   | 402 | 0.01741 | 0.03957 |
| Bladder       | MYCN   | AMP    | 6   | 614 | 0.00977 | 0.00325 | 4   | 402 | 0.00995 | 0.00484 |
| Bladder       | MYD88  | MUT    | 0   | 614 | 0.00000 | 0.00118 | 0   | 402 | 0.00000 | 0.00145 |
| Bladder       | NOTCH1 | FUSION | 0   | 614 | 0.00000 | 0.00018 | 0   | 402 | 0.00000 | 0.00048 |
| Bladder       | NRAS   | MUT    | 4   | 614 | 0.00651 | 0.02048 | 5   | 402 | 0.01244 | 0.02070 |
| Bladder       | NRG1   | FUSION | 0   | 614 | 0.00000 | 0.00039 | 0   | 402 | 0.00000 | 0.00039 |
| Bladder       | NTRK1  | FUSION | 0   | 614 | 0.00000 | 0.00026 | 0   | 402 | 0.00000 | 0.00097 |
| Bladder       | NTRK3  | FUSION | 0   | 614 | 0.00000 | 0.00066 | 0   | 402 | 0.00000 | 0.00097 |

|         |        |        |     |      |         |         |     |     |         |         |
|---------|--------|--------|-----|------|---------|---------|-----|-----|---------|---------|
| Bladder | PDGFRA | AMP    | 2   | 614  | 0.00326 | 0.00627 | 0   | 402 | 0.00000 | 0.00851 |
| Bladder | PDGFRA | MUT    | 0   | 614  | 0.00000 | 0.00048 | 0   | 402 | 0.00000 | 0.00223 |
| Bladder | PIK3CA | AMP    | 10  | 614  | 0.01629 | 0.02298 | 1   | 402 | 0.00249 | 0.00697 |
| Bladder | PIK3CA | MUT    | 113 | 614  | 0.18404 | 0.12387 | 84  | 402 | 0.20896 | 0.11474 |
| Bladder | POLE   | MUT    | 0   | 614  | 0.00000 | 0.00079 | 3   | 402 | 0.00746 | 0.00252 |
| Bladder | PRKACA | FUSION | 0   | 614  | 0.00000 | 0.00039 | 0   | 402 | 0.00000 | 0.00087 |
| Bladder | PTEN   | HOMDEL | 7   | 614  | 0.01140 | 0.03228 | 1   | 402 | 0.00249 | 0.02390 |
| Bladder | PTEN   | MUT    | 20  | 614  | 0.03257 | 0.06536 | 8   | 402 | 0.01990 | 0.05563 |
| Bladder | RAF1   | MUT    | 0   | 614  | 0.00000 | 0.00154 | 3   | 402 | 0.00746 | 0.00261 |
| Bladder | RB1    | HOMDEL | 20  | 614  | 0.03257 | 0.02298 | 7   | 402 | 0.01741 | 0.01896 |
| Bladder | RB1    | MUT    | 77  | 614  | 0.12541 | 0.04053 | 48  | 402 | 0.11940 | 0.04092 |
| Bladder | RET    | FUSION | 0   | 614  | 0.00000 | 0.00219 | 0   | 402 | 0.00000 | 0.00281 |
| Bladder | RET    | MUT    | 0   | 614  | 0.00000 | 0.00175 | 0   | 402 | 0.00000 | 0.00213 |
| Bladder | RIT1   | MUT    | 3   | 614  | 0.00489 | 0.00105 | 3   | 402 | 0.00746 | 0.00126 |
| Bladder | ROS1   | FUSION | 0   | 614  | 0.00000 | 0.00149 | 1   | 402 | 0.00249 | 0.00358 |
| Bladder | ROS1   | MUT    | 0   | 614  | 0.00000 | 0.00009 | 0   | 402 | 0.00000 | 0.00019 |
| Bladder | SF3B1  | MUT    | 3   | 614  | 0.00489 | 0.00807 | 9   | 402 | 0.02239 | 0.00803 |
| Bladder | SMO    | MUT    | 0   | 614  | 0.00000 | 0.00013 | 1   | 402 | 0.00249 | 0.00039 |
| Bladder | SPOP   | MUT    | 1   | 614  | 0.00163 | 0.00355 | 1   | 402 | 0.00249 | 0.00793 |
| Bladder | TERT   | FUSION | 0   | 614  | 0.00000 | 0.00009 | 0   | 402 | 0.00000 | 0.00000 |
| Bladder | TERT   | MUT    | 375 | 614  | 0.61075 | 0.09795 | 263 | 402 | 0.65423 | 0.12307 |
| Bladder | TP53   | HOMDEL | 9   | 614  | 0.01466 | 0.01276 | 1   | 402 | 0.00249 | 0.00900 |
| Bladder | TP53   | MUT    | 354 | 614  | 0.57655 | 0.52404 | 160 | 402 | 0.39801 | 0.41428 |
| Brain   | AKT1   | MUT    | 2   | 1203 | 0.00166 | 0.01026 | 1   | 513 | 0.00195 | 0.01045 |
| Brain   | ALK    | AMP    | 0   | 1203 | 0.00000 | 0.00018 | 0   | 513 | 0.00000 | 0.00039 |
| Brain   | ALK    | FUSION | 1   | 1203 | 0.00083 | 0.00570 | 0   | 513 | 0.00000 | 0.00474 |
| Brain   | ALK    | MUT    | 0   | 1203 | 0.00000 | 0.00061 | 0   | 513 | 0.00000 | 0.00184 |
| Brain   | AR     | AMP    | 0   | 1203 | 0.00000 | 0.00601 | 0   | 513 | 0.00000 | 0.00842 |
| Brain   | AR     | MUT    | 0   | 1203 | 0.00000 | 0.00136 | 0   | 513 | 0.00000 | 0.00213 |
| Brain   | ARAF   | MUT    | 0   | 1203 | 0.00000 | 0.00039 | 0   | 513 | 0.00000 | 0.00068 |
| Brain   | BRAF   | AMP    | 1   | 1203 | 0.00083 | 0.00250 | 2   | 513 | 0.00390 | 0.00164 |
| Brain   | BRAF   | FUSION | 4   | 1203 | 0.00333 | 0.00118 | 4   | 513 | 0.00780 | 0.00368 |
| Brain   | BRAF   | MUT    | 39  | 1203 | 0.03242 | 0.04106 | 10  | 513 | 0.01949 | 0.04247 |
| Brain   | CCND1  | AMP    | 4   | 1203 | 0.00333 | 0.04299 | 2   | 513 | 0.00390 | 0.04189 |
| Brain   | CDK4   | AMP    | 123 | 1203 | 0.10224 | 0.01921 | 57  | 513 | 0.11111 | 0.02632 |
| Brain   | CDK4   | MUT    | 0   | 1203 | 0.00000 | 0.00061 | 0   | 513 | 0.00000 | 0.00116 |
| Brain   | CDK6   | AMP    | 11  | 1203 | 0.00914 | 0.00697 | 8   | 513 | 0.01559 | 0.00590 |
| Brain   | CDKN2A | HOMDEL | 425 | 1203 | 0.35328 | 0.12234 | 169 | 513 | 0.32943 | 0.07498 |
| Brain   | CDKN2A | MUT    | 23  | 1203 | 0.01912 | 0.04917 | 9   | 513 | 0.01754 | 0.03599 |
| Brain   | CTNNB1 | MUT    | 1   | 1203 | 0.00083 | 0.02601 | 0   | 513 | 0.00000 | 0.02254 |
| Brain   | EGFR   | AMP    | 323 | 1203 | 0.26850 | 0.02996 | 121 | 513 | 0.23587 | 0.03154 |
| Brain   | EGFR   | FUSION | 23  | 1203 | 0.01912 | 0.00110 | 2   | 513 | 0.00390 | 0.00019 |
| Brain   | EGFR   | MUT    | 109 | 1203 | 0.09061 | 0.02649 | 57  | 513 | 0.11111 | 0.04112 |
| Brain   | ERBB2  | AMP    | 0   | 1203 | 0.00000 | 0.03202 | 0   | 513 | 0.00000 | 0.03938 |
| Brain   | ERBB2  | MUT    | 0   | 1203 | 0.00000 | 0.01689 | 0   | 513 | 0.00000 | 0.01945 |
| Brain   | ERBB3  | MUT    | 1   | 1203 | 0.00083 | 0.00561 | 0   | 513 | 0.00000 | 0.00987 |
| Brain   | ERBB4  | MUT    | 0   | 1203 | 0.00000 | 0.00022 | 0   | 513 | 0.00000 | 0.00155 |
| Brain   | ESR1   | MUT    | 0   | 1203 | 0.00000 | 0.00965 | 0   | 513 | 0.00000 | 0.01006 |
| Brain   | EZH2   | MUT    | 0   | 1203 | 0.00000 | 0.00140 | 1   | 513 | 0.00195 | 0.00281 |
| Brain   | FGFR1  | AMP    | 0   | 1203 | 0.00000 | 0.02816 | 0   | 513 | 0.00000 | 0.02554 |
| Brain   | FGFR1  | FUSION | 0   | 1203 | 0.00000 | 0.00013 | 0   | 513 | 0.00000 | 0.00039 |
| Brain   | FGFR2  | AMP    | 0   | 1203 | 0.00000 | 0.00347 | 0   | 513 | 0.00000 | 0.00358 |
| Brain   | FGFR2  | FUSION | 0   | 1203 | 0.00000 | 0.00083 | 0   | 513 | 0.00000 | 0.00300 |
| Brain   | FGFR2  | MUT    | 0   | 1203 | 0.00000 | 0.00531 | 0   | 513 | 0.00000 | 0.00435 |
| Brain   | FGFR3  | AMP    | 5   | 1203 | 0.00416 | 0.00263 | 3   | 513 | 0.00585 | 0.00387 |
| Brain   | FGFR3  | FUSION | 20  | 1203 | 0.01663 | 0.00294 | 12  | 513 | 0.02339 | 0.00271 |
| Brain   | FGFR3  | MUT    | 3   | 1203 | 0.00249 | 0.00588 | 1   | 513 | 0.00195 | 0.01200 |
| Brain   | FGFR4  | AMP    | 0   | 1203 | 0.00000 | 0.00075 | 1   | 513 | 0.00195 | 0.00252 |
| Brain   | GNA11  | MUT    | 0   | 1203 | 0.00000 | 0.00105 | 0   | 513 | 0.00000 | 0.00184 |
| Brain   | GNAQ   | MUT    | 0   | 1203 | 0.00000 | 0.00096 | 0   | 513 | 0.00000 | 0.00281 |
| Brain   | HRAS   | MUT    | 1   | 1203 | 0.00083 | 0.00504 | 1   | 513 | 0.00195 | 0.00658 |
| Brain   | IDH1   | MUT    | 256 | 1203 | 0.21280 | 0.01776 | 165 | 513 | 0.32164 | 0.02351 |
| Brain   | IDH2   | MUT    | 15  | 1203 | 0.01247 | 0.00281 | 13  | 513 | 0.02534 | 0.00290 |
| Brain   | JAK1   | MUT    | 0   | 1203 | 0.00000 | 0.00026 | 1   | 513 | 0.00195 | 0.00755 |
| Brain   | JAK2   | MUT    | 0   | 1203 | 0.00000 | 0.00066 | 0   | 513 | 0.00000 | 0.00019 |
| Brain   | KIT    | AMP    | 48  | 1203 | 0.03990 | 0.00675 | 33  | 513 | 0.06433 | 0.00832 |
| Brain   | KIT    | MUT    | 1   | 1203 | 0.00083 | 0.00675 | 0   | 513 | 0.00000 | 0.01335 |
| Brain   | KRAS   | AMP    | 10  | 1203 | 0.00831 | 0.01614 | 8   | 513 | 0.01559 | 0.01809 |
| Brain   | KRAS   | MUT    | 12  | 1203 | 0.00998 | 0.17580 | 4   | 513 | 0.00780 | 0.15257 |
| Brain   | MAP2K1 | MUT    | 1   | 1203 | 0.00083 | 0.00412 | 2   | 513 | 0.00390 | 0.00629 |
| Brain   | MAP2K2 | MUT    | 0   | 1203 | 0.00000 | 0.00022 | 0   | 513 | 0.00000 | 0.00058 |
| Brain   | MAP2K4 | MUT    | 0   | 1203 | 0.00000 | 0.00092 | 0   | 513 | 0.00000 | 0.00687 |
| Brain   | MAPK1  | MUT    | 0   | 1203 | 0.00000 | 0.00079 | 0   | 513 | 0.00000 | 0.00116 |
| Brain   | MDM2   | AMP    | 70  | 1203 | 0.05819 | 0.02772 | 33  | 513 | 0.06433 | 0.03696 |
| Brain   | MET    | AMP    | 15  | 1203 | 0.01247 | 0.00693 | 9   | 513 | 0.01754 | 0.00948 |
| Brain   | MET    | MUT    | 1   | 1203 | 0.00083 | 0.00355 | 0   | 513 | 0.00000 | 0.00300 |

|        |        |        |     |      |         |         |     |      |         |         |
|--------|--------|--------|-----|------|---------|---------|-----|------|---------|---------|
| Brain  | MTOR   | MUT    | 5   | 1203 | 0.00416 | 0.00390 | 2   | 513  | 0.00390 | 0.00619 |
| Brain  | MYC    | AMP    | 3   | 1203 | 0.00249 | 0.04066 | 5   | 513  | 0.00975 | 0.03957 |
| Brain  | MYCN   | AMP    | 12  | 1203 | 0.00998 | 0.00325 | 10  | 513  | 0.01949 | 0.00484 |
| Brain  | MYD88  | MUT    | 0   | 1203 | 0.00000 | 0.00118 | 0   | 513  | 0.00000 | 0.00145 |
| Brain  | NOTCH1 | FUSION | 0   | 1203 | 0.00000 | 0.00018 | 1   | 513  | 0.00195 | 0.00048 |
| Brain  | NRAS   | MUT    | 5   | 1203 | 0.00416 | 0.02048 | 2   | 513  | 0.00390 | 0.02070 |
| Brain  | NRG1   | FUSION | 0   | 1203 | 0.00000 | 0.00039 | 0   | 513  | 0.00000 | 0.00039 |
| Brain  | NTRK1  | FUSION | 1   | 1203 | 0.00083 | 0.00026 | 0   | 513  | 0.00000 | 0.00097 |
| Brain  | NTRK3  | FUSION | 0   | 1203 | 0.00000 | 0.00066 | 1   | 513  | 0.00195 | 0.00097 |
| Brain  | PDGFRA | AMP    | 64  | 1203 | 0.05320 | 0.00627 | 40  | 513  | 0.07797 | 0.00851 |
| Brain  | PDGFRA | MUT    | 8   | 1203 | 0.00665 | 0.00048 | 7   | 513  | 0.01365 | 0.00223 |
| Brain  | PIK3CA | AMP    | 5   | 1203 | 0.00416 | 0.02298 | 1   | 513  | 0.00195 | 0.00697 |
| Brain  | PIK3CA | MUT    | 113 | 1203 | 0.09393 | 0.12387 | 57  | 513  | 0.11111 | 0.11474 |
| Brain  | POLE   | MUT    | 0   | 1203 | 0.00000 | 0.00079 | 0   | 513  | 0.00000 | 0.00252 |
| Brain  | PRKACA | FUSION | 0   | 1203 | 0.00000 | 0.00039 | 0   | 513  | 0.00000 | 0.00087 |
| Brain  | PTEN   | HOMDEL | 49  | 1203 | 0.04073 | 0.03228 | 44  | 513  | 0.08577 | 0.02390 |
| Brain  | PTEN   | MUT    | 273 | 1203 | 0.22693 | 0.06536 | 116 | 513  | 0.22612 | 0.05563 |
| Brain  | RAF1   | MUT    | 2   | 1203 | 0.00166 | 0.00154 | 0   | 513  | 0.00000 | 0.00261 |
| Brain  | RB1    | HOMDEL | 11  | 1203 | 0.00914 | 0.02298 | 10  | 513  | 0.01949 | 0.01896 |
| Brain  | RB1    | MUT    | 53  | 1203 | 0.04406 | 0.04053 | 40  | 513  | 0.07797 | 0.04092 |
| Brain  | RET    | FUSION | 1   | 1203 | 0.00083 | 0.00219 | 0   | 513  | 0.00000 | 0.00281 |
| Brain  | RET    | MUT    | 1   | 1203 | 0.00083 | 0.00175 | 0   | 513  | 0.00000 | 0.00213 |
| Brain  | RIT1   | MUT    | 1   | 1203 | 0.00083 | 0.00105 | 0   | 513  | 0.00000 | 0.00126 |
| Brain  | ROS1   | FUSION | 1   | 1203 | 0.00083 | 0.00149 | 1   | 513  | 0.00195 | 0.00358 |
| Brain  | ROS1   | MUT    | 0   | 1203 | 0.00000 | 0.00009 | 0   | 513  | 0.00000 | 0.00019 |
| Brain  | SF3B1  | MUT    | 1   | 1203 | 0.00083 | 0.00807 | 0   | 513  | 0.00000 | 0.00803 |
| Brain  | SMO    | MUT    | 2   | 1203 | 0.00166 | 0.00013 | 0   | 513  | 0.00000 | 0.00039 |
| Brain  | SPOP   | MUT    | 0   | 1203 | 0.00000 | 0.00355 | 0   | 513  | 0.00000 | 0.00793 |
| Brain  | TERT   | FUSION | 0   | 1203 | 0.00000 | 0.00009 | 0   | 513  | 0.00000 | 0.00000 |
| Brain  | TERT   | MUT    | 675 | 1203 | 0.56110 | 0.09795 | 337 | 513  | 0.65692 | 0.12307 |
| Brain  | TP53   | HOMDEL | 3   | 1203 | 0.00249 | 0.01276 | 6   | 513  | 0.01170 | 0.00900 |
| Brain  | TP53   | MUT    | 428 | 1203 | 0.35578 | 0.52404 | 199 | 513  | 0.38791 | 0.41428 |
| Breast | AKT1   | MUT    | 96  | 2659 | 0.03610 | 0.01026 | 54  | 1228 | 0.04397 | 0.01045 |
| Breast | ALK    | AMP    | 0   | 2659 | 0.00000 | 0.00018 | 0   | 1228 | 0.00000 | 0.00039 |
| Breast | ALK    | FUSION | 0   | 2659 | 0.00000 | 0.00570 | 1   | 1228 | 0.00081 | 0.00474 |
| Breast | ALK    | MUT    | 0   | 2659 | 0.00000 | 0.00061 | 0   | 1228 | 0.00000 | 0.00184 |
| Breast | AR     | AMP    | 10  | 2659 | 0.00376 | 0.00601 | 4   | 1228 | 0.00326 | 0.00842 |
| Breast | AR     | MUT    | 1   | 2659 | 0.00038 | 0.00136 | 0   | 1228 | 0.00000 | 0.00213 |
| Breast | ARAF   | MUT    | 1   | 2659 | 0.00038 | 0.00039 | 0   | 1228 | 0.00000 | 0.00068 |
| Breast | BRAF   | AMP    | 7   | 2659 | 0.00263 | 0.00250 | 3   | 1228 | 0.00244 | 0.00164 |
| Breast | BRAF   | FUSION | 0   | 2659 | 0.00000 | 0.00118 | 1   | 1228 | 0.00081 | 0.00368 |
| Breast | BRAF   | MUT    | 15  | 2659 | 0.00564 | 0.04106 | 3   | 1228 | 0.00244 | 0.04247 |
| Breast | CCND1  | AMP    | 405 | 2659 | 0.15231 | 0.04299 | 228 | 1228 | 0.18567 | 0.04189 |
| Breast | CDK4   | AMP    | 41  | 2659 | 0.01542 | 0.01921 | 19  | 1228 | 0.01547 | 0.02632 |
| Breast | CDK4   | MUT    | 0   | 2659 | 0.00000 | 0.00061 | 0   | 1228 | 0.00000 | 0.00116 |
| Breast | CDK6   | AMP    | 4   | 2659 | 0.00150 | 0.00697 | 4   | 1228 | 0.00326 | 0.00590 |
| Breast | CDKN2A | HOMDEL | 131 | 2659 | 0.04927 | 0.12234 | 27  | 1228 | 0.02199 | 0.07498 |
| Breast | CDKN2A | MUT    | 24  | 2659 | 0.00903 | 0.04917 | 12  | 1228 | 0.00977 | 0.03599 |
| Breast | CTNNB1 | MUT    | 4   | 2659 | 0.00150 | 0.02601 | 2   | 1228 | 0.00163 | 0.02254 |
| Breast | EGFR   | AMP    | 28  | 2659 | 0.01053 | 0.02996 | 15  | 1228 | 0.01221 | 0.03154 |
| Breast | EGFR   | MUT    | 2   | 2659 | 0.00075 | 0.02649 | 6   | 1228 | 0.00489 | 0.04112 |
| Breast | ERBB2  | AMP    | 263 | 2659 | 0.09891 | 0.03202 | 179 | 1228 | 0.14577 | 0.03938 |
| Breast | ERBB2  | MUT    | 79  | 2659 | 0.02971 | 0.01689 | 42  | 1228 | 0.03420 | 0.01945 |
| Breast | ERBB3  | MUT    | 7   | 2659 | 0.00263 | 0.00561 | 14  | 1228 | 0.01140 | 0.00987 |
| Breast | ERBB4  | MUT    | 0   | 2659 | 0.00000 | 0.00022 | 1   | 1228 | 0.00081 | 0.00155 |
| Breast | ESR1   | MUT    | 195 | 2659 | 0.07334 | 0.00965 | 94  | 1228 | 0.07655 | 0.01006 |
| Breast | EZH2   | MUT    | 0   | 2659 | 0.00000 | 0.00140 | 0   | 1228 | 0.00000 | 0.00281 |
| Breast | FGFR1  | AMP    | 335 | 2659 | 0.12599 | 0.02816 | 152 | 1228 | 0.12378 | 0.02554 |
| Breast | FGFR1  | FUSION | 1   | 2659 | 0.00038 | 0.00013 | 0   | 1228 | 0.00000 | 0.00039 |
| Breast | FGFR2  | AMP    | 26  | 2659 | 0.00978 | 0.00347 | 20  | 1228 | 0.01629 | 0.00358 |
| Breast | FGFR2  | FUSION | 0   | 2659 | 0.00000 | 0.00083 | 1   | 1228 | 0.00081 | 0.00300 |
| Breast | FGFR2  | MUT    | 19  | 2659 | 0.00715 | 0.00531 | 7   | 1228 | 0.00570 | 0.00435 |
| Breast | FGFR3  | AMP    | 9   | 2659 | 0.00338 | 0.00263 | 10  | 1228 | 0.00814 | 0.00387 |
| Breast | FGFR3  | FUSION | 2   | 2659 | 0.00075 | 0.00294 | 1   | 1228 | 0.00081 | 0.00271 |
| Breast | FGFR3  | MUT    | 1   | 2659 | 0.00038 | 0.00588 | 2   | 1228 | 0.00163 | 0.01200 |
| Breast | FGFR4  | AMP    | 6   | 2659 | 0.00226 | 0.00075 | 6   | 1228 | 0.00489 | 0.00252 |
| Breast | GNA11  | MUT    | 0   | 2659 | 0.00000 | 0.00105 | 0   | 1228 | 0.00000 | 0.00184 |
| Breast | GNAQ   | MUT    | 0   | 2659 | 0.00000 | 0.00096 | 0   | 1228 | 0.00000 | 0.00281 |
| Breast | HRAS   | MUT    | 5   | 2659 | 0.00188 | 0.00504 | 2   | 1228 | 0.00163 | 0.00658 |
| Breast | IDH1   | MUT    | 4   | 2659 | 0.00150 | 0.01776 | 1   | 1228 | 0.00081 | 0.02351 |
| Breast | IDH2   | MUT    | 3   | 2659 | 0.00113 | 0.00281 | 0   | 1228 | 0.00000 | 0.00290 |
| Breast | JAK1   | MUT    | 0   | 2659 | 0.00000 | 0.00026 | 8   | 1228 | 0.00651 | 0.00755 |
| Breast | JAK2   | MUT    | 1   | 2659 | 0.00038 | 0.00066 | 0   | 1228 | 0.00000 | 0.00019 |
| Breast | KIT    | AMP    | 14  | 2659 | 0.00527 | 0.00675 | 5   | 1228 | 0.00407 | 0.00832 |
| Breast | KIT    | MUT    | 1   | 2659 | 0.00038 | 0.00675 | 2   | 1228 | 0.00163 | 0.01335 |
| Breast | KRAS   | AMP    | 30  | 2659 | 0.01128 | 0.01614 | 11  | 1228 | 0.00896 | 0.01809 |

|                  |        |        |      |      |         |         |     |      |         |         |
|------------------|--------|--------|------|------|---------|---------|-----|------|---------|---------|
| Breast           | KRAS   | MUT    | 42   | 2659 | 0.01580 | 0.17580 | 10  | 1228 | 0.00814 | 0.15257 |
| Breast           | MAP2K1 | MUT    | 0    | 2659 | 0.00000 | 0.00412 | 1   | 1228 | 0.00081 | 0.00629 |
| Breast           | MAP2K2 | MUT    | 1    | 2659 | 0.00038 | 0.00022 | 1   | 1228 | 0.00081 | 0.00058 |
| Breast           | MAP2K4 | MUT    | 13   | 2659 | 0.00489 | 0.00092 | 36  | 1228 | 0.02932 | 0.00687 |
| Breast           | MAPK1  | MUT    | 1    | 2659 | 0.00038 | 0.00079 | 0   | 1228 | 0.00000 | 0.00116 |
| Breast           | MDM2   | AMP    | 109  | 2659 | 0.04099 | 0.02772 | 50  | 1228 | 0.04072 | 0.03696 |
| Breast           | MET    | AMP    | 1    | 2659 | 0.00038 | 0.00693 | 2   | 1228 | 0.00163 | 0.00948 |
| Breast           | MET    | MUT    | 0    | 2659 | 0.00000 | 0.00355 | 0   | 1228 | 0.00000 | 0.00300 |
| Breast           | MTOR   | MUT    | 6    | 2659 | 0.00226 | 0.00390 | 2   | 1228 | 0.00163 | 0.00619 |
| Breast           | MYC    | AMP    | 214  | 2659 | 0.08048 | 0.04066 | 116 | 1228 | 0.09446 | 0.03957 |
| Breast           | MYCN   | AMP    | 8    | 2659 | 0.00301 | 0.00325 | 2   | 1228 | 0.00163 | 0.00484 |
| Breast           | MYD88  | MUT    | 0    | 2659 | 0.00000 | 0.00118 | 1   | 1228 | 0.00081 | 0.00145 |
| Breast           | NOTCH1 | FUSION | 3    | 2659 | 0.00113 | 0.00018 | 1   | 1228 | 0.00081 | 0.00048 |
| Breast           | NRAS   | MUT    | 1    | 2659 | 0.00038 | 0.02048 | 0   | 1228 | 0.00000 | 0.02070 |
| Breast           | NRG1   | FUSION | 0    | 2659 | 0.00000 | 0.00039 | 1   | 1228 | 0.00081 | 0.00039 |
| Breast           | NTRK1  | FUSION | 1    | 2659 | 0.00038 | 0.00026 | 0   | 1228 | 0.00000 | 0.00097 |
| Breast           | NTRK3  | FUSION | 2    | 2659 | 0.00075 | 0.00066 | 0   | 1228 | 0.00000 | 0.00097 |
| Breast           | PDGFRA | AMP    | 6    | 2659 | 0.00226 | 0.00627 | 5   | 1228 | 0.00407 | 0.00851 |
| Breast           | PDGFRA | MUT    | 0    | 2659 | 0.00000 | 0.00048 | 0   | 1228 | 0.00000 | 0.00223 |
| Breast           | PIK3CA | AMP    | 74   | 2659 | 0.02783 | 0.02298 | 16  | 1228 | 0.01303 | 0.00697 |
| Breast           | PIK3CA | MUT    | 909  | 2659 | 0.34186 | 0.12387 | 423 | 1228 | 0.34446 | 0.11474 |
| Breast           | POLE   | MUT    | 0    | 2659 | 0.00000 | 0.00079 | 4   | 1228 | 0.00326 | 0.00252 |
| Breast           | PRKACA | FUSION | 0    | 2659 | 0.00000 | 0.00039 | 0   | 1228 | 0.00000 | 0.00087 |
| Breast           | PTEN   | HOMDEL | 91   | 2659 | 0.03422 | 0.03228 | 29  | 1228 | 0.02362 | 0.02390 |
| Breast           | PTEN   | MUT    | 188  | 2659 | 0.07070 | 0.06536 | 80  | 1228 | 0.06515 | 0.05563 |
| Breast           | RAF1   | MUT    | 1    | 2659 | 0.00038 | 0.00154 | 1   | 1228 | 0.00081 | 0.00261 |
| Breast           | RB1    | HOMDEL | 56   | 2659 | 0.02106 | 0.02298 | 16  | 1228 | 0.01303 | 0.01896 |
| Breast           | RB1    | MUT    | 70   | 2659 | 0.02633 | 0.04053 | 31  | 1228 | 0.02524 | 0.04092 |
| Breast           | RET    | FUSION | 0    | 2659 | 0.00000 | 0.00219 | 0   | 1228 | 0.00000 | 0.00281 |
| Breast           | RET    | MUT    | 2    | 2659 | 0.00075 | 0.00175 | 1   | 1228 | 0.00081 | 0.00213 |
| Breast           | RIT1   | MUT    | 0    | 2659 | 0.00000 | 0.00105 | 1   | 1228 | 0.00081 | 0.00126 |
| Breast           | ROS1   | FUSION | 2    | 2659 | 0.00075 | 0.00149 | 0   | 1228 | 0.00000 | 0.00358 |
| Breast           | ROS1   | MUT    | 1    | 2659 | 0.00038 | 0.00009 | 0   | 1228 | 0.00000 | 0.00019 |
| Breast           | SF3B1  | MUT    | 57   | 2659 | 0.02144 | 0.00807 | 17  | 1228 | 0.01384 | 0.00803 |
| Breast           | SMO    | MUT    | 0    | 2659 | 0.00000 | 0.00013 | 0   | 1228 | 0.00000 | 0.00039 |
| Breast           | SPOP   | MUT    | 1    | 2659 | 0.00038 | 0.00355 | 2   | 1228 | 0.00163 | 0.00793 |
| Breast           | TERT   | FUSION | 0    | 2659 | 0.00000 | 0.00009 | 0   | 1228 | 0.00000 | 0.00000 |
| Breast           | TERT   | MUT    | 15   | 2659 | 0.00564 | 0.09795 | 7   | 1228 | 0.00570 | 0.12307 |
| Breast           | TP53   | HOMDEL | 39   | 2659 | 0.01467 | 0.01276 | 6   | 1228 | 0.00489 | 0.00900 |
| Breast           | TP53   | MUT    | 1185 | 2659 | 0.44566 | 0.52404 | 510 | 1228 | 0.41531 | 0.41428 |
| Colon and Rectum | AKT1   | MUT    | 31   | 3020 | 0.01026 | 0.01026 | 12  | 1053 | 0.01140 | 0.01045 |
| Colon and Rectum | ALK    | AMP    | 0    | 3020 | 0.00000 | 0.00018 | 0   | 1053 | 0.00000 | 0.00039 |
| Colon and Rectum | ALK    | FUSION | 2    | 3020 | 0.00066 | 0.00570 | 0   | 1053 | 0.00000 | 0.00474 |
| Colon and Rectum | ALK    | MUT    | 0    | 3020 | 0.00000 | 0.00061 | 3   | 1053 | 0.00285 | 0.00184 |
| Colon and Rectum | AR     | AMP    | 1    | 3020 | 0.00033 | 0.00601 | 0   | 1053 | 0.00000 | 0.00842 |
| Colon and Rectum | AR     | MUT    | 3    | 3020 | 0.00099 | 0.00136 | 0   | 1053 | 0.00000 | 0.00213 |
| Colon and Rectum | ARAF   | MUT    | 0    | 3020 | 0.00000 | 0.00039 | 1   | 1053 | 0.00095 | 0.00068 |
| Colon and Rectum | BRAF   | AMP    | 2    | 3020 | 0.00066 | 0.00250 | 1   | 1053 | 0.00095 | 0.00164 |
| Colon and Rectum | BRAF   | FUSION | 2    | 3020 | 0.00066 | 0.00118 | 2   | 1053 | 0.00190 | 0.00368 |
| Colon and Rectum | BRAF   | MUT    | 258  | 3020 | 0.08543 | 0.04106 | 91  | 1053 | 0.08642 | 0.04247 |
| Colon and Rectum | CCND1  | AMP    | 25   | 3020 | 0.00828 | 0.04299 | 10  | 1053 | 0.00950 | 0.04189 |
| Colon and Rectum | CDK4   | AMP    | 0    | 3020 | 0.00000 | 0.01921 | 1   | 1053 | 0.00095 | 0.02632 |
| Colon and Rectum | CDK4   | MUT    | 0    | 3020 | 0.00000 | 0.00061 | 0   | 1053 | 0.00000 | 0.00116 |
| Colon and Rectum | CDK6   | AMP    | 9    | 3020 | 0.00298 | 0.00697 | 4   | 1053 | 0.00380 | 0.00590 |
| Colon and Rectum | CDKN2A | HOMDEL | 39   | 3020 | 0.01291 | 0.12234 | 10  | 1053 | 0.00950 | 0.07498 |
| Colon and Rectum | CDKN2A | MUT    | 24   | 3020 | 0.00795 | 0.04917 | 12  | 1053 | 0.01140 | 0.03599 |
| Colon and Rectum | CTNNB1 | MUT    | 45   | 3020 | 0.01490 | 0.02601 | 23  | 1053 | 0.02184 | 0.02254 |
| Colon and Rectum | EGFR   | AMP    | 47   | 3020 | 0.01556 | 0.02996 | 14  | 1053 | 0.01330 | 0.03154 |
| Colon and Rectum | EGFR   | MUT    | 1    | 3020 | 0.00033 | 0.02649 | 8   | 1053 | 0.00760 | 0.04112 |
| Colon and Rectum | ERBB2  | AMP    | 79   | 3020 | 0.02616 | 0.03202 | 29  | 1053 | 0.02754 | 0.03938 |
| Colon and Rectum | ERBB2  | MUT    | 80   | 3020 | 0.02649 | 0.01689 | 26  | 1053 | 0.02469 | 0.01945 |
| Colon and Rectum | ERBB3  | MUT    | 46   | 3020 | 0.01523 | 0.00561 | 21  | 1053 | 0.01994 | 0.00987 |
| Colon and Rectum | ERBB4  | MUT    | 0    | 3020 | 0.00000 | 0.00022 | 3   | 1053 | 0.00285 | 0.00155 |
| Colon and Rectum | ESR1   | MUT    | 0    | 3020 | 0.00000 | 0.00965 | 0   | 1053 | 0.00000 | 0.01006 |
| Colon and Rectum | EZH2   | MUT    | 0    | 3020 | 0.00000 | 0.00140 | 2   | 1053 | 0.00190 | 0.00281 |
| Colon and Rectum | FGFR1  | AMP    | 56   | 3020 | 0.01854 | 0.02816 | 17  | 1053 | 0.01614 | 0.02554 |
| Colon and Rectum | FGFR1  | FUSION | 0    | 3020 | 0.00000 | 0.00013 | 2   | 1053 | 0.00190 | 0.00039 |
| Colon and Rectum | FGFR2  | AMP    | 1    | 3020 | 0.00033 | 0.00347 | 0   | 1053 | 0.00000 | 0.00358 |
| Colon and Rectum | FGFR2  | FUSION | 0    | 3020 | 0.00000 | 0.00083 | 0   | 1053 | 0.00000 | 0.00300 |
| Colon and Rectum | FGFR2  | MUT    | 1    | 3020 | 0.00033 | 0.00531 | 5   | 1053 | 0.00475 | 0.00435 |
| Colon and Rectum | FGFR3  | AMP    | 2    | 3020 | 0.00066 | 0.00263 | 0   | 1053 | 0.00000 | 0.00387 |
| Colon and Rectum | FGFR3  | FUSION | 0    | 3020 | 0.00000 | 0.00294 | 0   | 1053 | 0.00000 | 0.00271 |
| Colon and Rectum | FGFR3  | MUT    | 1    | 3020 | 0.00033 | 0.00588 | 0   | 1053 | 0.00000 | 0.01200 |
| Colon and Rectum | FGFR4  | AMP    | 0    | 3020 | 0.00000 | 0.00075 | 1   | 1053 | 0.00095 | 0.00252 |
| Colon and Rectum | GNA11  | MUT    | 0    | 3020 | 0.00000 | 0.00105 | 0   | 1053 | 0.00000 | 0.00184 |
| Colon and Rectum | GNAQ   | MUT    | 0    | 3020 | 0.00000 | 0.00096 | 0   | 1053 | 0.00000 | 0.00281 |

|                  |        |        |      |      |         |         |     |      |         |         |
|------------------|--------|--------|------|------|---------|---------|-----|------|---------|---------|
| Colon and Rectum | HRAS   | MUT    | 1    | 3020 | 0.00033 | 0.00504 | 2   | 1053 | 0.00190 | 0.00658 |
| Colon and Rectum | IDH1   | MUT    | 12   | 3020 | 0.00397 | 0.01776 | 1   | 1053 | 0.00095 | 0.02351 |
| Colon and Rectum | IDH2   | MUT    | 2    | 3020 | 0.00066 | 0.00281 | 0   | 1053 | 0.00000 | 0.00290 |
| Colon and Rectum | JAK1   | MUT    | 1    | 3020 | 0.00033 | 0.00026 | 9   | 1053 | 0.00855 | 0.00755 |
| Colon and Rectum | JAK2   | MUT    | 1    | 3020 | 0.00033 | 0.00066 | 0   | 1053 | 0.00000 | 0.00019 |
| Colon and Rectum | KIT    | AMP    | 1    | 3020 | 0.00033 | 0.00675 | 1   | 1053 | 0.00095 | 0.00832 |
| Colon and Rectum | KIT    | MUT    | 0    | 3020 | 0.00000 | 0.00675 | 2   | 1053 | 0.00190 | 0.01335 |
| Colon and Rectum | KRAS   | AMP    | 25   | 3020 | 0.00828 | 0.01614 | 12  | 1053 | 0.01140 | 0.01809 |
| Colon and Rectum | KRAS   | MUT    | 1417 | 3020 | 0.46921 | 0.17580 | 477 | 1053 | 0.45299 | 0.15257 |
| Colon and Rectum | MAP2K1 | MUT    | 23   | 3020 | 0.00762 | 0.00412 | 12  | 1053 | 0.01140 | 0.00629 |
| Colon and Rectum | MAP2K2 | MUT    | 0    | 3020 | 0.00000 | 0.00022 | 0   | 1053 | 0.00000 | 0.00058 |
| Colon and Rectum | MAP2K4 | MUT    | 4    | 3020 | 0.00132 | 0.00092 | 13  | 1053 | 0.01235 | 0.00687 |
| Colon and Rectum | MAPK1  | MUT    | 0    | 3020 | 0.00000 | 0.00079 | 0   | 1053 | 0.00000 | 0.00116 |
| Colon and Rectum | MDM2   | AMP    | 5    | 3020 | 0.00166 | 0.02772 | 3   | 1053 | 0.00285 | 0.03696 |
| Colon and Rectum | MET    | AMP    | 11   | 3020 | 0.00364 | 0.00693 | 11  | 1053 | 0.01045 | 0.00948 |
| Colon and Rectum | MET    | MUT    | 0    | 3020 | 0.00000 | 0.00355 | 0   | 1053 | 0.00000 | 0.00300 |
| Colon and Rectum | MTOR   | MUT    | 33   | 3020 | 0.01093 | 0.00390 | 13  | 1053 | 0.01235 | 0.00619 |
| Colon and Rectum | MYC    | AMP    | 116  | 3020 | 0.03841 | 0.04066 | 43  | 1053 | 0.04084 | 0.03957 |
| Colon and Rectum | MYCN   | AMP    | 2    | 3020 | 0.00066 | 0.00325 | 1   | 1053 | 0.00095 | 0.00484 |
| Colon and Rectum | MYD88  | MUT    | 0    | 3020 | 0.00000 | 0.00118 | 1   | 1053 | 0.00095 | 0.00145 |
| Colon and Rectum | NOTCH1 | FUSION | 0    | 3020 | 0.00000 | 0.00018 | 0   | 1053 | 0.00000 | 0.00048 |
| Colon and Rectum | NRAS   | MUT    | 125  | 3020 | 0.04139 | 0.02048 | 37  | 1053 | 0.03514 | 0.02070 |
| Colon and Rectum | NRG1   | FUSION | 1    | 3020 | 0.00033 | 0.00039 | 0   | 1053 | 0.00000 | 0.00039 |
| Colon and Rectum | NTRK1  | FUSION | 3    | 3020 | 0.00099 | 0.00026 | 3   | 1053 | 0.00285 | 0.00097 |
| Colon and Rectum | NTRK3  | FUSION | 2    | 3020 | 0.00066 | 0.00066 | 1   | 1053 | 0.00095 | 0.00097 |
| Colon and Rectum | PDGFRA | AMP    | 1    | 3020 | 0.00033 | 0.00627 | 1   | 1053 | 0.00095 | 0.00851 |
| Colon and Rectum | PDGFRA | MUT    | 0    | 3020 | 0.00000 | 0.00048 | 0   | 1053 | 0.00000 | 0.00223 |
| Colon and Rectum | PIK3CA | AMP    | 5    | 3020 | 0.00166 | 0.02298 | 1   | 1053 | 0.00095 | 0.00697 |
| Colon and Rectum | PIK3CA | MUT    | 482  | 3020 | 0.15960 | 0.12387 | 182 | 1053 | 0.17284 | 0.11474 |
| Colon and Rectum | POLE   | MUT    | 7    | 3020 | 0.00232 | 0.00079 | 7   | 1053 | 0.00665 | 0.00252 |
| Colon and Rectum | PRKACA | FUSION | 0    | 3020 | 0.00000 | 0.00039 | 0   | 1053 | 0.00000 | 0.00087 |
| Colon and Rectum | PTEN   | HOMDEL | 85   | 3020 | 0.02815 | 0.03228 | 15  | 1053 | 0.01425 | 0.02390 |
| Colon and Rectum | PTEN   | MUT    | 107  | 3020 | 0.03543 | 0.06536 | 59  | 1053 | 0.05603 | 0.05563 |
| Colon and Rectum | RAF1   | MUT    | 13   | 3020 | 0.00430 | 0.00154 | 5   | 1053 | 0.00475 | 0.00261 |
| Colon and Rectum | RB1    | HOMDEL | 7    | 3020 | 0.00232 | 0.02298 | 1   | 1053 | 0.00095 | 0.01896 |
| Colon and Rectum | RB1    | MUT    | 21   | 3020 | 0.00695 | 0.04053 | 11  | 1053 | 0.01045 | 0.04092 |
| Colon and Rectum | RET    | FUSION | 1    | 3020 | 0.00033 | 0.00219 | 1   | 1053 | 0.00095 | 0.00281 |
| Colon and Rectum | RET    | MUT    | 4    | 3020 | 0.00132 | 0.00175 | 2   | 1053 | 0.00190 | 0.00213 |
| Colon and Rectum | RIT1   | MUT    | 0    | 3020 | 0.00000 | 0.00105 | 1   | 1053 | 0.00095 | 0.00126 |
| Colon and Rectum | ROS1   | FUSION | 0    | 3020 | 0.00000 | 0.00149 | 0   | 1053 | 0.00000 | 0.00358 |
| Colon and Rectum | ROS1   | MUT    | 0    | 3020 | 0.00000 | 0.00009 | 0   | 1053 | 0.00000 | 0.00019 |
| Colon and Rectum | SF3B1  | MUT    | 6    | 3020 | 0.00199 | 0.00807 | 0   | 1053 | 0.00000 | 0.00803 |
| Colon and Rectum | SMO    | MUT    | 0    | 3020 | 0.00000 | 0.00013 | 0   | 1053 | 0.00000 | 0.00039 |
| Colon and Rectum | SPOP   | MUT    | 0    | 3020 | 0.00000 | 0.00355 | 0   | 1053 | 0.00000 | 0.00793 |
| Colon and Rectum | TERT   | FUSION | 0    | 3020 | 0.00000 | 0.00009 | 0   | 1053 | 0.00000 | 0.00000 |
| Colon and Rectum | TERT   | MUT    | 28   | 3020 | 0.00927 | 0.09795 | 16  | 1053 | 0.01519 | 0.12307 |
| Colon and Rectum | TP53   | HOMDEL | 44   | 3020 | 0.01457 | 0.01276 | 5   | 1053 | 0.00475 | 0.00900 |
| Colon and Rectum | TP53   | MUT    | 2200 | 3020 | 0.72848 | 0.52404 | 731 | 1053 | 0.69421 | 0.41428 |
| Endometrium      | AKT1   | MUT    | 30   | 919  | 0.03264 | 0.01026 | 8   | 210  | 0.03810 | 0.01045 |
| Endometrium      | ALK    | AMP    | 0    | 919  | 0.00000 | 0.00018 | 0   | 210  | 0.00000 | 0.00039 |
| Endometrium      | ALK    | FUSION | 0    | 919  | 0.00000 | 0.00570 | 0   | 210  | 0.00000 | 0.00474 |
| Endometrium      | ALK    | MUT    | 0    | 919  | 0.00000 | 0.00061 | 0   | 210  | 0.00000 | 0.00184 |
| Endometrium      | AR     | AMP    | 0    | 919  | 0.00000 | 0.00601 | 0   | 210  | 0.00000 | 0.00842 |
| Endometrium      | AR     | MUT    | 0    | 919  | 0.00000 | 0.00136 | 0   | 210  | 0.00000 | 0.00213 |
| Endometrium      | ARAF   | MUT    | 0    | 919  | 0.00000 | 0.00039 | 0   | 210  | 0.00000 | 0.00068 |
| Endometrium      | BRAF   | AMP    | 0    | 919  | 0.00000 | 0.00250 | 0   | 210  | 0.00000 | 0.00164 |
| Endometrium      | BRAF   | FUSION | 0    | 919  | 0.00000 | 0.00118 | 0   | 210  | 0.00000 | 0.00368 |
| Endometrium      | BRAF   | MUT    | 7    | 919  | 0.00762 | 0.04106 | 2   | 210  | 0.00952 | 0.04247 |
| Endometrium      | CCND1  | AMP    | 4    | 919  | 0.00435 | 0.04299 | 4   | 210  | 0.01905 | 0.04189 |
| Endometrium      | CDK4   | AMP    | 3    | 919  | 0.00326 | 0.01921 | 1   | 210  | 0.00476 | 0.02632 |
| Endometrium      | CDK4   | MUT    | 0    | 919  | 0.00000 | 0.00061 | 0   | 210  | 0.00000 | 0.00116 |
| Endometrium      | CDK6   | AMP    | 5    | 919  | 0.00544 | 0.00697 | 0   | 210  | 0.00000 | 0.00590 |
| Endometrium      | CDKN2A | HOMDEL | 17   | 919  | 0.01850 | 0.12234 | 3   | 210  | 0.01429 | 0.07498 |
| Endometrium      | CDKN2A | MUT    | 13   | 919  | 0.01415 | 0.04917 | 4   | 210  | 0.01905 | 0.03599 |
| Endometrium      | CTNNB1 | MUT    | 162  | 919  | 0.17628 | 0.02601 | 27  | 210  | 0.12857 | 0.02254 |
| Endometrium      | EGFR   | AMP    | 2    | 919  | 0.00218 | 0.02996 | 0   | 210  | 0.00000 | 0.03154 |
| Endometrium      | EGFR   | MUT    | 4    | 919  | 0.00435 | 0.02649 | 1   | 210  | 0.00476 | 0.04112 |
| Endometrium      | ERBB2  | AMP    | 54   | 919  | 0.05876 | 0.03202 | 17  | 210  | 0.08095 | 0.03938 |
| Endometrium      | ERBB2  | MUT    | 16   | 919  | 0.01741 | 0.01689 | 8   | 210  | 0.03810 | 0.01945 |
| Endometrium      | ERBB3  | MUT    | 15   | 919  | 0.01632 | 0.00561 | 8   | 210  | 0.03810 | 0.00987 |
| Endometrium      | ERBB4  | MUT    | 0    | 919  | 0.00000 | 0.00022 | 0   | 210  | 0.00000 | 0.00155 |
| Endometrium      | ESR1   | MUT    | 20   | 919  | 0.02176 | 0.00965 | 7   | 210  | 0.03333 | 0.01006 |
| Endometrium      | EZH2   | MUT    | 0    | 919  | 0.00000 | 0.00140 | 2   | 210  | 0.00952 | 0.00281 |
| Endometrium      | FGFR1  | AMP    | 19   | 919  | 0.02067 | 0.02816 | 9   | 210  | 0.04286 | 0.02554 |
| Endometrium      | FGFR1  | FUSION | 0    | 919  | 0.00000 | 0.00013 | 0   | 210  | 0.00000 | 0.00039 |
| Endometrium      | FGFR2  | AMP    | 0    | 919  | 0.00000 | 0.00347 | 1   | 210  | 0.00476 | 0.00358 |

|                   |        |        |     |     |         |         |     |     |         |         |
|-------------------|--------|--------|-----|-----|---------|---------|-----|-----|---------|---------|
| Endometrium       | FGFR2  | FUSION | 0   | 919 | 0.00000 | 0.00083 | 0   | 210 | 0.00000 | 0.00300 |
| Endometrium       | FGFR2  | MUT    | 64  | 919 | 0.06964 | 0.00531 | 11  | 210 | 0.05238 | 0.00435 |
| Endometrium       | FGFR3  | AMP    | 3   | 919 | 0.00326 | 0.00263 | 2   | 210 | 0.00952 | 0.00387 |
| Endometrium       | FGFR3  | FUSION | 1   | 919 | 0.00109 | 0.00294 | 1   | 210 | 0.00476 | 0.00271 |
| Endometrium       | FGFR3  | MUT    | 2   | 919 | 0.00218 | 0.00588 | 0   | 210 | 0.00000 | 0.01200 |
| Endometrium       | FGFR4  | AMP    | 0   | 919 | 0.00000 | 0.00075 | 0   | 210 | 0.00000 | 0.00252 |
| Endometrium       | GNA11  | MUT    | 0   | 919 | 0.00000 | 0.00105 | 0   | 210 | 0.00000 | 0.00184 |
| Endometrium       | GNAQ   | MUT    | 0   | 919 | 0.00000 | 0.00096 | 0   | 210 | 0.00000 | 0.00281 |
| Endometrium       | HRAS   | MUT    | 0   | 919 | 0.00000 | 0.00504 | 0   | 210 | 0.00000 | 0.00658 |
| Endometrium       | IDH1   | MUT    | 1   | 919 | 0.00109 | 0.01776 | 0   | 210 | 0.00000 | 0.02351 |
| Endometrium       | IDH2   | MUT    | 0   | 919 | 0.00000 | 0.00281 | 0   | 210 | 0.00000 | 0.00290 |
| Endometrium       | JAK1   | MUT    | 0   | 919 | 0.00000 | 0.00026 | 19  | 210 | 0.09048 | 0.00755 |
| Endometrium       | JAK2   | MUT    | 3   | 919 | 0.00326 | 0.00066 | 0   | 210 | 0.00000 | 0.00019 |
| Endometrium       | KIT    | AMP    | 5   | 919 | 0.00544 | 0.00675 | 0   | 210 | 0.00000 | 0.00832 |
| Endometrium       | KIT    | MUT    | 0   | 919 | 0.00000 | 0.00675 | 0   | 210 | 0.00000 | 0.01335 |
| Endometrium       | KRAS   | AMP    | 6   | 919 | 0.00653 | 0.01614 | 3   | 210 | 0.01429 | 0.01809 |
| Endometrium       | KRAS   | MUT    | 158 | 919 | 0.17193 | 0.17580 | 39  | 210 | 0.18571 | 0.15257 |
| Endometrium       | MAP2K1 | MUT    | 2   | 919 | 0.00218 | 0.00412 | 1   | 210 | 0.00476 | 0.00629 |
| Endometrium       | MAP2K2 | MUT    | 0   | 919 | 0.00000 | 0.00022 | 0   | 210 | 0.00000 | 0.00058 |
| Endometrium       | MAP2K4 | MUT    | 0   | 919 | 0.00000 | 0.00092 | 2   | 210 | 0.00952 | 0.00687 |
| Endometrium       | MAPK1  | MUT    | 0   | 919 | 0.00000 | 0.00079 | 0   | 210 | 0.00000 | 0.00116 |
| Endometrium       | MDM2   | AMP    | 5   | 919 | 0.00544 | 0.02772 | 3   | 210 | 0.01429 | 0.03696 |
| Endometrium       | MET    | AMP    | 2   | 919 | 0.00218 | 0.00693 | 0   | 210 | 0.00000 | 0.00948 |
| Endometrium       | MET    | MUT    | 0   | 919 | 0.00000 | 0.00355 | 0   | 210 | 0.00000 | 0.00300 |
| Endometrium       | MTOR   | MUT    | 7   | 919 | 0.00762 | 0.00390 | 5   | 210 | 0.02381 | 0.00619 |
| Endometrium       | MYC    | AMP    | 34  | 919 | 0.03700 | 0.04066 | 12  | 210 | 0.05714 | 0.03957 |
| Endometrium       | MYCN   | AMP    | 5   | 919 | 0.00544 | 0.00325 | 1   | 210 | 0.00476 | 0.00484 |
| Endometrium       | MYD88  | MUT    | 0   | 919 | 0.00000 | 0.00118 | 0   | 210 | 0.00000 | 0.00145 |
| Endometrium       | NOTCH1 | FUSION | 0   | 919 | 0.00000 | 0.00018 | 0   | 210 | 0.00000 | 0.00048 |
| Endometrium       | NRAS   | MUT    | 13  | 919 | 0.01415 | 0.02048 | 3   | 210 | 0.01429 | 0.02070 |
| Endometrium       | NRG1   | FUSION | 0   | 919 | 0.00000 | 0.00039 | 0   | 210 | 0.00000 | 0.00039 |
| Endometrium       | NTRK1  | FUSION | 0   | 919 | 0.00000 | 0.00026 | 0   | 210 | 0.00000 | 0.00097 |
| Endometrium       | NTRK3  | FUSION | 0   | 919 | 0.00000 | 0.00066 | 0   | 210 | 0.00000 | 0.00097 |
| Endometrium       | PDGFRA | AMP    | 3   | 919 | 0.00326 | 0.00627 | 0   | 210 | 0.00000 | 0.00851 |
| Endometrium       | PDGFRA | MUT    | 0   | 919 | 0.00000 | 0.00048 | 1   | 210 | 0.00476 | 0.00223 |
| Endometrium       | PIK3CA | AMP    | 21  | 919 | 0.02285 | 0.02298 | 3   | 210 | 0.01429 | 0.00697 |
| Endometrium       | PIK3CA | MUT    | 338 | 919 | 0.36779 | 0.12387 | 85  | 210 | 0.40476 | 0.11474 |
| Endometrium       | POLE   | MUT    | 6   | 919 | 0.00653 | 0.00079 | 6   | 210 | 0.02857 | 0.00252 |
| Endometrium       | PRKACA | FUSION | 0   | 919 | 0.00000 | 0.00039 | 0   | 210 | 0.00000 | 0.00087 |
| Endometrium       | PTEN   | HOMDEL | 21  | 919 | 0.02285 | 0.03228 | 0   | 210 | 0.00000 | 0.02390 |
| Endometrium       | PTEN   | MUT    | 338 | 919 | 0.36779 | 0.06536 | 66  | 210 | 0.31429 | 0.05563 |
| Endometrium       | RAF1   | MUT    | 2   | 919 | 0.00218 | 0.00154 | 0   | 210 | 0.00000 | 0.00261 |
| Endometrium       | RB1    | HOMDEL | 15  | 919 | 0.01632 | 0.02298 | 3   | 210 | 0.01429 | 0.01896 |
| Endometrium       | RB1    | MUT    | 29  | 919 | 0.03156 | 0.04053 | 8   | 210 | 0.03810 | 0.04092 |
| Endometrium       | RET    | FUSION | 0   | 919 | 0.00000 | 0.00219 | 0   | 210 | 0.00000 | 0.00281 |
| Endometrium       | RET    | MUT    | 0   | 919 | 0.00000 | 0.00175 | 0   | 210 | 0.00000 | 0.00213 |
| Endometrium       | RIT1   | MUT    | 2   | 919 | 0.00218 | 0.00105 | 1   | 210 | 0.00476 | 0.00126 |
| Endometrium       | ROS1   | FUSION | 0   | 919 | 0.00000 | 0.00149 | 0   | 210 | 0.00000 | 0.00358 |
| Endometrium       | ROS1   | MUT    | 0   | 919 | 0.00000 | 0.00009 | 0   | 210 | 0.00000 | 0.00019 |
| Endometrium       | SF3B1  | MUT    | 2   | 919 | 0.00218 | 0.00807 | 1   | 210 | 0.00476 | 0.00803 |
| Endometrium       | SMO    | MUT    | 0   | 919 | 0.00000 | 0.00013 | 0   | 210 | 0.00000 | 0.00039 |
| Endometrium       | SPOP   | MUT    | 0   | 919 | 0.00000 | 0.00355 | 7   | 210 | 0.03333 | 0.00793 |
| Endometrium       | TERT   | FUSION | 0   | 919 | 0.00000 | 0.00009 | 0   | 210 | 0.00000 | 0.00000 |
| Endometrium       | TERT   | MUT    | 12  | 919 | 0.01306 | 0.09795 | 1   | 210 | 0.00476 | 0.12307 |
| Endometrium       | TP53   | HOMDEL | 3   | 919 | 0.00326 | 0.01276 | 0   | 210 | 0.00000 | 0.00900 |
| Endometrium       | TP53   | MUT    | 495 | 919 | 0.53863 | 0.52404 | 112 | 210 | 0.53333 | 0.41428 |
| Esophagus_Stomach | AKT1   | MUT    | 2   | 994 | 0.00201 | 0.01026 | 1   | 315 | 0.00317 | 0.01045 |
| Esophagus_Stomach | ALK    | AMP    | 0   | 994 | 0.00000 | 0.00018 | 0   | 315 | 0.00000 | 0.00039 |
| Esophagus_Stomach | ALK    | FUSION | 0   | 994 | 0.00000 | 0.00570 | 0   | 315 | 0.00000 | 0.00474 |
| Esophagus_Stomach | ALK    | MUT    | 0   | 994 | 0.00000 | 0.00061 | 1   | 315 | 0.00317 | 0.00184 |
| Esophagus_Stomach | AR     | AMP    | 0   | 994 | 0.00000 | 0.00601 | 0   | 315 | 0.00000 | 0.00842 |
| Esophagus_Stomach | AR     | MUT    | 0   | 994 | 0.00000 | 0.00136 | 1   | 315 | 0.00317 | 0.00213 |
| Esophagus_Stomach | ARAF   | MUT    | 0   | 994 | 0.00000 | 0.00039 | 0   | 315 | 0.00000 | 0.00068 |
| Esophagus_Stomach | BRAF   | AMP    | 1   | 994 | 0.00101 | 0.00250 | 0   | 315 | 0.00000 | 0.00164 |
| Esophagus_Stomach | BRAF   | FUSION | 0   | 994 | 0.00000 | 0.00118 | 0   | 315 | 0.00000 | 0.00368 |
| Esophagus_Stomach | BRAF   | MUT    | 13  | 994 | 0.01308 | 0.04106 | 3   | 315 | 0.00952 | 0.04247 |
| Esophagus_Stomach | CCND1  | AMP    | 112 | 994 | 0.11268 | 0.04299 | 21  | 315 | 0.06667 | 0.04189 |
| Esophagus_Stomach | CDK4   | AMP    | 11  | 994 | 0.01107 | 0.01921 | 4   | 315 | 0.01270 | 0.02632 |
| Esophagus_Stomach | CDK4   | MUT    | 0   | 994 | 0.00000 | 0.00061 | 0   | 315 | 0.00000 | 0.00116 |
| Esophagus_Stomach | CDK6   | AMP    | 59  | 994 | 0.05936 | 0.00697 | 12  | 315 | 0.03810 | 0.00590 |
| Esophagus_Stomach | CDKN2A | HOMDEL | 171 | 994 | 0.17203 | 0.12234 | 17  | 315 | 0.05397 | 0.07498 |
| Esophagus_Stomach | CDKN2A | MUT    | 94  | 994 | 0.09457 | 0.04917 | 26  | 315 | 0.08254 | 0.03599 |
| Esophagus_Stomach | CTNNB1 | MUT    | 14  | 994 | 0.01408 | 0.02601 | 4   | 315 | 0.01270 | 0.02254 |
| Esophagus_Stomach | EGFR   | AMP    | 60  | 994 | 0.06036 | 0.02996 | 19  | 315 | 0.06032 | 0.03154 |
| Esophagus_Stomach | EGFR   | MUT    | 0   | 994 | 0.00000 | 0.02649 | 1   | 315 | 0.00317 | 0.04112 |
| Esophagus_Stomach | ERBB2  | AMP    | 106 | 994 | 0.10664 | 0.03202 | 65  | 315 | 0.20635 | 0.03938 |

|                   |        |        |     |     |         |         |     |     |         |         |
|-------------------|--------|--------|-----|-----|---------|---------|-----|-----|---------|---------|
| Esophagus_Stomach | ERBB2  | MUT    | 29  | 994 | 0.02918 | 0.01689 | 11  | 315 | 0.03492 | 0.01945 |
| Esophagus_Stomach | ERBB3  | MUT    | 8   | 994 | 0.00805 | 0.00561 | 16  | 315 | 0.05079 | 0.00987 |
| Esophagus_Stomach | ERBB4  | MUT    | 0   | 994 | 0.00000 | 0.00022 | 2   | 315 | 0.00635 | 0.00155 |
| Esophagus_Stomach | ESR1   | MUT    | 0   | 994 | 0.00000 | 0.00965 | 0   | 315 | 0.00000 | 0.01006 |
| Esophagus_Stomach | EZH2   | MUT    | 0   | 994 | 0.00000 | 0.00140 | 0   | 315 | 0.00000 | 0.00281 |
| Esophagus_Stomach | FGFR1  | AMP    | 16  | 994 | 0.01610 | 0.02816 | 5   | 315 | 0.01587 | 0.02554 |
| Esophagus_Stomach | FGFR1  | FUSION | 0   | 994 | 0.00000 | 0.00013 | 0   | 315 | 0.00000 | 0.00039 |
| Esophagus_Stomach | FGFR2  | AMP    | 27  | 994 | 0.02716 | 0.00347 | 9   | 315 | 0.02857 | 0.00358 |
| Esophagus_Stomach | FGFR2  | FUSION | 0   | 994 | 0.00000 | 0.00083 | 0   | 315 | 0.00000 | 0.00300 |
| Esophagus_Stomach | FGFR2  | MUT    | 3   | 994 | 0.00302 | 0.00531 | 2   | 315 | 0.00635 | 0.00435 |
| Esophagus_Stomach | FGFR3  | AMP    | 3   | 994 | 0.00302 | 0.00263 | 1   | 315 | 0.00317 | 0.00387 |
| Esophagus_Stomach | FGFR3  | FUSION | 3   | 994 | 0.00302 | 0.00294 | 0   | 315 | 0.00000 | 0.00271 |
| Esophagus_Stomach | FGFR3  | MUT    | 0   | 994 | 0.00000 | 0.00588 | 0   | 315 | 0.00000 | 0.01200 |
| Esophagus_Stomach | FGFR4  | AMP    | 0   | 994 | 0.00000 | 0.00075 | 0   | 315 | 0.00000 | 0.00252 |
| Esophagus_Stomach | GNA11  | MUT    | 0   | 994 | 0.00000 | 0.00105 | 0   | 315 | 0.00000 | 0.00184 |
| Esophagus_Stomach | GNAQ   | MUT    | 0   | 994 | 0.00000 | 0.00096 | 0   | 315 | 0.00000 | 0.00281 |
| Esophagus_Stomach | HRAS   | MUT    | 3   | 994 | 0.00302 | 0.00504 | 1   | 315 | 0.00317 | 0.00658 |
| Esophagus_Stomach | IDH1   | MUT    | 1   | 994 | 0.00101 | 0.01776 | 0   | 315 | 0.00000 | 0.02351 |
| Esophagus_Stomach | IDH2   | MUT    | 0   | 994 | 0.00000 | 0.00281 | 0   | 315 | 0.00000 | 0.00290 |
| Esophagus_Stomach | JAK1   | MUT    | 0   | 994 | 0.00000 | 0.00026 | 5   | 315 | 0.01587 | 0.00755 |
| Esophagus_Stomach | JAK2   | MUT    | 1   | 994 | 0.00101 | 0.00066 | 0   | 315 | 0.00000 | 0.00019 |
| Esophagus_Stomach | KIT    | AMP    | 1   | 994 | 0.00101 | 0.00675 | 0   | 315 | 0.00000 | 0.00832 |
| Esophagus_Stomach | KIT    | MUT    | 2   | 994 | 0.00201 | 0.00675 | 0   | 315 | 0.00000 | 0.01335 |
| Esophagus_Stomach | KRAS   | AMP    | 102 | 994 | 0.10262 | 0.01614 | 26  | 315 | 0.08254 | 0.01809 |
| Esophagus_Stomach | KRAS   | MUT    | 64  | 994 | 0.06439 | 0.17580 | 24  | 315 | 0.07619 | 0.15257 |
| Esophagus_Stomach | MAP2K1 | MUT    | 5   | 994 | 0.00503 | 0.00412 | 1   | 315 | 0.00317 | 0.00629 |
| Esophagus_Stomach | MAP2K2 | MUT    | 0   | 994 | 0.00000 | 0.00022 | 0   | 315 | 0.00000 | 0.00058 |
| Esophagus_Stomach | MAP2K4 | MUT    | 0   | 994 | 0.00000 | 0.00092 | 1   | 315 | 0.00317 | 0.00687 |
| Esophagus_Stomach | MAPK1  | MUT    | 1   | 994 | 0.00101 | 0.00079 | 0   | 315 | 0.00000 | 0.00116 |
| Esophagus_Stomach | MDM2   | AMP    | 33  | 994 | 0.03320 | 0.02772 | 14  | 315 | 0.04444 | 0.03696 |
| Esophagus_Stomach | MET    | AMP    | 32  | 994 | 0.03219 | 0.00693 | 8   | 315 | 0.02540 | 0.00948 |
| Esophagus_Stomach | MET    | MUT    | 0   | 994 | 0.00000 | 0.00355 | 0   | 315 | 0.00000 | 0.00300 |
| Esophagus_Stomach | MTOR   | MUT    | 0   | 994 | 0.00000 | 0.00390 | 1   | 315 | 0.00317 | 0.00619 |
| Esophagus_Stomach | MYC    | AMP    | 76  | 994 | 0.07646 | 0.04066 | 14  | 315 | 0.04444 | 0.03957 |
| Esophagus_Stomach | MYCN   | AMP    | 2   | 994 | 0.00201 | 0.00325 | 0   | 315 | 0.00000 | 0.00484 |
| Esophagus_Stomach | MYD88  | MUT    | 1   | 994 | 0.00101 | 0.00118 | 0   | 315 | 0.00000 | 0.00145 |
| Esophagus_Stomach | NOTCH1 | FUSION | 0   | 994 | 0.00000 | 0.00018 | 1   | 315 | 0.00317 | 0.00048 |
| Esophagus_Stomach | NRAS   | MUT    | 3   | 994 | 0.00302 | 0.02048 | 2   | 315 | 0.00635 | 0.02070 |
| Esophagus_Stomach | NRG1   | FUSION | 0   | 994 | 0.00000 | 0.00039 | 0   | 315 | 0.00000 | 0.00039 |
| Esophagus_Stomach | NTRK1  | FUSION | 0   | 994 | 0.00000 | 0.00026 | 0   | 315 | 0.00000 | 0.00097 |
| Esophagus_Stomach | NTRK3  | FUSION | 0   | 994 | 0.00000 | 0.00066 | 0   | 315 | 0.00000 | 0.00097 |
| Esophagus_Stomach | PDGFRA | AMP    | 1   | 994 | 0.00101 | 0.00627 | 0   | 315 | 0.00000 | 0.00851 |
| Esophagus_Stomach | PDGFRA | MUT    | 0   | 994 | 0.00000 | 0.00048 | 0   | 315 | 0.00000 | 0.00223 |
| Esophagus_Stomach | PIK3CA | AMP    | 25  | 994 | 0.02515 | 0.02298 | 0   | 315 | 0.00000 | 0.00697 |
| Esophagus_Stomach | PIK3CA | MUT    | 75  | 994 | 0.07545 | 0.12387 | 19  | 315 | 0.06032 | 0.11474 |
| Esophagus_Stomach | POLE   | MUT    | 0   | 994 | 0.00000 | 0.00079 | 0   | 315 | 0.00000 | 0.00252 |
| Esophagus_Stomach | PRKACA | FUSION | 0   | 994 | 0.00000 | 0.00039 | 0   | 315 | 0.00000 | 0.00087 |
| Esophagus_Stomach | PTEN   | HOMDEL | 13  | 994 | 0.01308 | 0.03228 | 2   | 315 | 0.00635 | 0.02390 |
| Esophagus_Stomach | PTEN   | MUT    | 20  | 994 | 0.02012 | 0.06536 | 11  | 315 | 0.03492 | 0.05563 |
| Esophagus_Stomach | RAF1   | MUT    | 0   | 994 | 0.00000 | 0.00154 | 1   | 315 | 0.00317 | 0.00261 |
| Esophagus_Stomach | RB1    | HOMDEL | 13  | 994 | 0.01308 | 0.02298 | 3   | 315 | 0.00952 | 0.01896 |
| Esophagus_Stomach | RB1    | MUT    | 17  | 994 | 0.01710 | 0.04053 | 4   | 315 | 0.01270 | 0.04092 |
| Esophagus_Stomach | RET    | FUSION | 0   | 994 | 0.00000 | 0.00219 | 1   | 315 | 0.00317 | 0.00281 |
| Esophagus_Stomach | RET    | MUT    | 0   | 994 | 0.00000 | 0.00175 | 1   | 315 | 0.00317 | 0.00213 |
| Esophagus_Stomach | RIT1   | MUT    | 1   | 994 | 0.00101 | 0.00105 | 0   | 315 | 0.00000 | 0.00126 |
| Esophagus_Stomach | ROS1   | FUSION | 0   | 994 | 0.00000 | 0.00149 | 1   | 315 | 0.00317 | 0.00358 |
| Esophagus_Stomach | ROS1   | MUT    | 0   | 994 | 0.00000 | 0.00009 | 0   | 315 | 0.00000 | 0.00019 |
| Esophagus_Stomach | SF3B1  | MUT    | 0   | 994 | 0.00000 | 0.00807 | 0   | 315 | 0.00000 | 0.00803 |
| Esophagus_Stomach | SMO    | MUT    | 0   | 994 | 0.00000 | 0.00013 | 0   | 315 | 0.00000 | 0.00039 |
| Esophagus_Stomach | SPOP   | MUT    | 0   | 994 | 0.00000 | 0.00355 | 1   | 315 | 0.00317 | 0.00793 |
| Esophagus_Stomach | TERT   | FUSION | 0   | 994 | 0.00000 | 0.00009 | 0   | 315 | 0.00000 | 0.00000 |
| Esophagus_Stomach | TERT   | MUT    | 4   | 994 | 0.00402 | 0.09795 | 2   | 315 | 0.00635 | 0.12307 |
| Esophagus_Stomach | TP53   | HOMDEL | 8   | 994 | 0.00805 | 0.01276 | 1   | 315 | 0.00317 | 0.00900 |
| Esophagus_Stomach | TP53   | MUT    | 730 | 994 | 0.73441 | 0.52404 | 220 | 315 | 0.69841 | 0.41428 |
| Head and Neck     | AKT1   | MUT    | 6   | 746 | 0.00804 | 0.01026 | 2   | 282 | 0.00709 | 0.01045 |
| Head and Neck     | ALK    | AMP    | 0   | 746 | 0.00000 | 0.00018 | 0   | 282 | 0.00000 | 0.00039 |
| Head and Neck     | ALK    | FUSION | 0   | 746 | 0.00000 | 0.00570 | 1   | 282 | 0.00355 | 0.00474 |
| Head and Neck     | ALK    | MUT    | 0   | 746 | 0.00000 | 0.00061 | 0   | 282 | 0.00000 | 0.00184 |
| Head and Neck     | AR     | AMP    | 0   | 746 | 0.00000 | 0.00601 | 1   | 282 | 0.00355 | 0.00842 |
| Head and Neck     | AR     | MUT    | 0   | 746 | 0.00000 | 0.00136 | 0   | 282 | 0.00000 | 0.00213 |
| Head and Neck     | ARAF   | MUT    | 0   | 746 | 0.00000 | 0.00039 | 0   | 282 | 0.00000 | 0.00068 |
| Head and Neck     | BRAF   | AMP    | 1   | 746 | 0.00134 | 0.00250 | 0   | 282 | 0.00000 | 0.00164 |
| Head and Neck     | BRAF   | FUSION | 0   | 746 | 0.00000 | 0.00118 | 0   | 282 | 0.00000 | 0.00368 |
| Head and Neck     | BRAF   | MUT    | 8   | 746 | 0.01072 | 0.04106 | 1   | 282 | 0.00355 | 0.04247 |
| Head and Neck     | CCND1  | AMP    | 116 | 746 | 0.15550 | 0.04299 | 22  | 282 | 0.07801 | 0.04189 |
| Head and Neck     | CDK4   | AMP    | 3   | 746 | 0.00402 | 0.01921 | 3   | 282 | 0.01064 | 0.02632 |

|               |        |        |     |     |         |         |     |     |         |         |
|---------------|--------|--------|-----|-----|---------|---------|-----|-----|---------|---------|
| Head and Neck | CDK4   | MUT    | 0   | 746 | 0.00000 | 0.00061 | 0   | 282 | 0.00000 | 0.00116 |
| Head and Neck | CDK6   | AMP    | 5   | 746 | 0.00670 | 0.00697 | 3   | 282 | 0.01064 | 0.00590 |
| Head and Neck | CDKN2A | HOMDEL | 126 | 746 | 0.16890 | 0.12234 | 28  | 282 | 0.09929 | 0.07498 |
| Head and Neck | CDKN2A | MUT    | 92  | 746 | 0.12332 | 0.04917 | 17  | 282 | 0.06028 | 0.03599 |
| Head and Neck | CTNNB1 | MUT    | 4   | 746 | 0.00536 | 0.02601 | 0   | 282 | 0.00000 | 0.02254 |
| Head and Neck | EGFR   | AMP    | 28  | 746 | 0.03753 | 0.02996 | 13  | 282 | 0.04610 | 0.03154 |
| Head and Neck | EGFR   | MUT    | 3   | 746 | 0.00402 | 0.02649 | 0   | 282 | 0.00000 | 0.04112 |
| Head and Neck | ERBB2  | AMP    | 14  | 746 | 0.01877 | 0.03202 | 12  | 282 | 0.04255 | 0.03938 |
| Head and Neck | ERBB2  | MUT    | 2   | 746 | 0.00268 | 0.01689 | 4   | 282 | 0.01418 | 0.01945 |
| Head and Neck | ERBB3  | MUT    | 5   | 746 | 0.00670 | 0.00561 | 2   | 282 | 0.00709 | 0.00987 |
| Head and Neck | ERBB4  | MUT    | 0   | 746 | 0.00000 | 0.00022 | 0   | 282 | 0.00000 | 0.00155 |
| Head and Neck | ESR1   | MUT    | 0   | 746 | 0.00000 | 0.00965 | 0   | 282 | 0.00000 | 0.01006 |
| Head and Neck | EZH2   | MUT    | 0   | 746 | 0.00000 | 0.00140 | 1   | 282 | 0.00355 | 0.00281 |
| Head and Neck | FGFR1  | AMP    | 9   | 746 | 0.01206 | 0.02816 | 5   | 282 | 0.01773 | 0.02554 |
| Head and Neck | FGFR1  | FUSION | 0   | 746 | 0.00000 | 0.00013 | 0   | 282 | 0.00000 | 0.00039 |
| Head and Neck | FGFR2  | AMP    | 1   | 746 | 0.00134 | 0.00347 | 0   | 282 | 0.00000 | 0.00358 |
| Head and Neck | FGFR2  | FUSION | 1   | 746 | 0.00134 | 0.00083 | 0   | 282 | 0.00000 | 0.00300 |
| Head and Neck | FGFR2  | MUT    | 3   | 746 | 0.00402 | 0.00531 | 2   | 282 | 0.00709 | 0.00435 |
| Head and Neck | FGFR3  | AMP    | 1   | 746 | 0.00134 | 0.00263 | 1   | 282 | 0.00355 | 0.00387 |
| Head and Neck | FGFR3  | FUSION | 2   | 746 | 0.00268 | 0.00294 | 1   | 282 | 0.00355 | 0.00271 |
| Head and Neck | FGFR3  | MUT    | 7   | 746 | 0.00938 | 0.00588 | 4   | 282 | 0.01418 | 0.01200 |
| Head and Neck | FGFR4  | AMP    | 0   | 746 | 0.00000 | 0.00075 | 0   | 282 | 0.00000 | 0.00252 |
| Head and Neck | GNA11  | MUT    | 1   | 746 | 0.00134 | 0.00105 | 0   | 282 | 0.00000 | 0.00184 |
| Head and Neck | GNAQ   | MUT    | 0   | 746 | 0.00000 | 0.00096 | 0   | 282 | 0.00000 | 0.00281 |
| Head and Neck | HRAS   | MUT    | 23  | 746 | 0.03083 | 0.00504 | 11  | 282 | 0.03901 | 0.00658 |
| Head and Neck | IDH1   | MUT    | 3   | 746 | 0.00402 | 0.01776 | 1   | 282 | 0.00355 | 0.02351 |
| Head and Neck | IDH2   | MUT    | 2   | 746 | 0.00268 | 0.00281 | 2   | 282 | 0.00709 | 0.00290 |
| Head and Neck | JAK1   | MUT    | 0   | 746 | 0.00000 | 0.00026 | 1   | 282 | 0.00355 | 0.00755 |
| Head and Neck | JAK2   | MUT    | 1   | 746 | 0.00134 | 0.00066 | 0   | 282 | 0.00000 | 0.00019 |
| Head and Neck | KIT    | AMP    | 3   | 746 | 0.00402 | 0.00675 | 7   | 282 | 0.02482 | 0.00832 |
| Head and Neck | KIT    | MUT    | 1   | 746 | 0.00134 | 0.00675 | 0   | 282 | 0.00000 | 0.01335 |
| Head and Neck | KRAS   | AMP    | 6   | 746 | 0.00804 | 0.01614 | 1   | 282 | 0.00355 | 0.01809 |
| Head and Neck | KRAS   | MUT    | 12  | 746 | 0.01609 | 0.17580 | 3   | 282 | 0.01064 | 0.15257 |
| Head and Neck | MAP2K1 | MUT    | 1   | 746 | 0.00134 | 0.00412 | 0   | 282 | 0.00000 | 0.00629 |
| Head and Neck | MAP2K2 | MUT    | 0   | 746 | 0.00000 | 0.00022 | 0   | 282 | 0.00000 | 0.00058 |
| Head and Neck | MAP2K4 | MUT    | 0   | 746 | 0.00000 | 0.00092 | 1   | 282 | 0.00355 | 0.00687 |
| Head and Neck | MAPK1  | MUT    | 4   | 746 | 0.00536 | 0.00079 | 4   | 282 | 0.01418 | 0.00116 |
| Head and Neck | MDM2   | AMP    | 13  | 746 | 0.01743 | 0.02772 | 5   | 282 | 0.01773 | 0.03696 |
| Head and Neck | MET    | AMP    | 2   | 746 | 0.00268 | 0.00693 | 0   | 282 | 0.00000 | 0.00948 |
| Head and Neck | MET    | MUT    | 0   | 746 | 0.00000 | 0.00355 | 0   | 282 | 0.00000 | 0.00300 |
| Head and Neck | MTOR   | MUT    | 2   | 746 | 0.00268 | 0.00390 | 2   | 282 | 0.00709 | 0.00619 |
| Head and Neck | MYC    | AMP    | 16  | 746 | 0.02145 | 0.04066 | 4   | 282 | 0.01418 | 0.03957 |
| Head and Neck | MYCN   | AMP    | 1   | 746 | 0.00134 | 0.00325 | 1   | 282 | 0.00355 | 0.00484 |
| Head and Neck | MYD88  | MUT    | 1   | 746 | 0.00134 | 0.00118 | 0   | 282 | 0.00000 | 0.00145 |
| Head and Neck | NOTCH1 | FUSION | 0   | 746 | 0.00000 | 0.00018 | 0   | 282 | 0.00000 | 0.00048 |
| Head and Neck | NRAS   | MUT    | 4   | 746 | 0.00536 | 0.02048 | 3   | 282 | 0.01064 | 0.02070 |
| Head and Neck | NRG1   | FUSION | 0   | 746 | 0.00000 | 0.00039 | 0   | 282 | 0.00000 | 0.00039 |
| Head and Neck | NTRK1  | FUSION | 0   | 746 | 0.00000 | 0.00026 | 0   | 282 | 0.00000 | 0.00097 |
| Head and Neck | NTRK3  | FUSION | 4   | 746 | 0.00536 | 0.00066 | 4   | 282 | 0.01418 | 0.00097 |
| Head and Neck | PDGFRA | AMP    | 3   | 746 | 0.00402 | 0.00627 | 9   | 282 | 0.03191 | 0.00851 |
| Head and Neck | PDGFRA | MUT    | 0   | 746 | 0.00000 | 0.00048 | 0   | 282 | 0.00000 | 0.00223 |
| Head and Neck | PIK3CA | AMP    | 80  | 746 | 0.10724 | 0.02298 | 9   | 282 | 0.03191 | 0.00697 |
| Head and Neck | PIK3CA | MUT    | 93  | 746 | 0.12466 | 0.12387 | 43  | 282 | 0.15248 | 0.11474 |
| Head and Neck | POLE   | MUT    | 0   | 746 | 0.00000 | 0.00079 | 0   | 282 | 0.00000 | 0.00252 |
| Head and Neck | PRKACA | FUSION | 0   | 746 | 0.00000 | 0.00039 | 0   | 282 | 0.00000 | 0.00087 |
| Head and Neck | PTEN   | HOMDEL | 23  | 746 | 0.03083 | 0.03228 | 3   | 282 | 0.01064 | 0.02390 |
| Head and Neck | PTEN   | MUT    | 19  | 746 | 0.02547 | 0.06536 | 11  | 282 | 0.03901 | 0.05563 |
| Head and Neck | RAF1   | MUT    | 0   | 746 | 0.00000 | 0.00154 | 1   | 282 | 0.00355 | 0.00261 |
| Head and Neck | RB1    | HOMDEL | 7   | 746 | 0.00938 | 0.02298 | 3   | 282 | 0.01064 | 0.01896 |
| Head and Neck | RB1    | MUT    | 22  | 746 | 0.02949 | 0.04053 | 9   | 282 | 0.03191 | 0.04092 |
| Head and Neck | RET    | FUSION | 2   | 746 | 0.00268 | 0.00219 | 0   | 282 | 0.00000 | 0.00281 |
| Head and Neck | RET    | MUT    | 0   | 746 | 0.00000 | 0.00175 | 1   | 282 | 0.00355 | 0.00213 |
| Head and Neck | RIT1   | MUT    | 2   | 746 | 0.00268 | 0.00105 | 1   | 282 | 0.00355 | 0.00126 |
| Head and Neck | ROS1   | FUSION | 0   | 746 | 0.00000 | 0.00149 | 1   | 282 | 0.00355 | 0.00358 |
| Head and Neck | ROS1   | MUT    | 0   | 746 | 0.00000 | 0.00009 | 0   | 282 | 0.00000 | 0.00019 |
| Head and Neck | SF3B1  | MUT    | 4   | 746 | 0.00536 | 0.00807 | 1   | 282 | 0.00355 | 0.00803 |
| Head and Neck | SMO    | MUT    | 0   | 746 | 0.00000 | 0.00013 | 0   | 282 | 0.00000 | 0.00039 |
| Head and Neck | SPOP   | MUT    | 2   | 746 | 0.00268 | 0.00355 | 0   | 282 | 0.00000 | 0.00793 |
| Head and Neck | TERT   | FUSION | 0   | 746 | 0.00000 | 0.00009 | 0   | 282 | 0.00000 | 0.00000 |
| Head and Neck | TERT   | MUT    | 122 | 746 | 0.16354 | 0.09795 | 50  | 282 | 0.17730 | 0.12307 |
| Head and Neck | TP53   | HOMDEL | 5   | 746 | 0.00670 | 0.01276 | 2   | 282 | 0.00709 | 0.00900 |
| Head and Neck | TP53   | MUT    | 350 | 746 | 0.46917 | 0.52404 | 101 | 282 | 0.35816 | 0.41428 |
| Kidney        | AKT1   | MUT    | 2   | 510 | 0.00392 | 0.01026 | 1   | 322 | 0.00311 | 0.01045 |
| Kidney        | ALK    | AMP    | 0   | 510 | 0.00000 | 0.00018 | 0   | 322 | 0.00000 | 0.00039 |
| Kidney        | ALK    | FUSION | 1   | 510 | 0.00196 | 0.00570 | 2   | 322 | 0.00621 | 0.00474 |
| Kidney        | ALK    | MUT    | 0   | 510 | 0.00000 | 0.00061 | 0   | 322 | 0.00000 | 0.00184 |



|        |        |        |    |     |         |         |    |     |         |         |
|--------|--------|--------|----|-----|---------|---------|----|-----|---------|---------|
| Kidney | AR     | AMP    | 0  | 510 | 0.00000 | 0.00601 | 0  | 322 | 0.00000 | 0.00842 |
| Kidney | AR     | MUT    | 0  | 510 | 0.00000 | 0.00136 | 0  | 322 | 0.00000 | 0.00213 |
| Kidney | ARAF   | MUT    | 0  | 510 | 0.00000 | 0.00039 | 1  | 322 | 0.00311 | 0.00068 |
| Kidney | BRAF   | AMP    | 2  | 510 | 0.00392 | 0.00250 | 0  | 322 | 0.00000 | 0.00164 |
| Kidney | BRAF   | FUSION | 0  | 510 | 0.00000 | 0.00118 | 0  | 322 | 0.00000 | 0.00368 |
| Kidney | BRAF   | MUT    | 0  | 510 | 0.00000 | 0.04106 | 0  | 322 | 0.00000 | 0.04247 |
| Kidney | CCND1  | AMP    | 0  | 510 | 0.00000 | 0.04299 | 0  | 322 | 0.00000 | 0.04189 |
| Kidney | CDK4   | AMP    | 0  | 510 | 0.00000 | 0.01921 | 0  | 322 | 0.00000 | 0.02632 |
| Kidney | CDK4   | MUT    | 1  | 510 | 0.00196 | 0.00061 | 0  | 322 | 0.00000 | 0.00116 |
| Kidney | CDK6   | AMP    | 0  | 510 | 0.00000 | 0.00697 | 0  | 322 | 0.00000 | 0.00590 |
| Kidney | CDKN2A | HOMDEL | 51 | 510 | 0.10000 | 0.12234 | 11 | 322 | 0.03416 | 0.07498 |
| Kidney | CDKN2A | MUT    | 7  | 510 | 0.01373 | 0.04917 | 0  | 322 | 0.00000 | 0.03599 |
| Kidney | CTNNB1 | MUT    | 0  | 510 | 0.00000 | 0.02601 | 0  | 322 | 0.00000 | 0.02254 |
| Kidney | EGFR   | AMP    | 1  | 510 | 0.00196 | 0.02996 | 0  | 322 | 0.00000 | 0.03154 |
| Kidney | EGFR   | MUT    | 0  | 510 | 0.00000 | 0.02649 | 0  | 322 | 0.00000 | 0.04112 |
| Kidney | ERBB2  | AMP    | 0  | 510 | 0.00000 | 0.03202 | 0  | 322 | 0.00000 | 0.03938 |
| Kidney | ERBB2  | MUT    | 1  | 510 | 0.00196 | 0.01689 | 0  | 322 | 0.00000 | 0.01945 |
| Kidney | ERBB3  | MUT    | 0  | 510 | 0.00000 | 0.00561 | 1  | 322 | 0.00311 | 0.00987 |
| Kidney | ERBB4  | MUT    | 0  | 510 | 0.00000 | 0.00022 | 0  | 322 | 0.00000 | 0.00155 |
| Kidney | ESR1   | MUT    | 0  | 510 | 0.00000 | 0.00965 | 0  | 322 | 0.00000 | 0.01006 |
| Kidney | EZH2   | MUT    | 0  | 510 | 0.00000 | 0.00140 | 0  | 322 | 0.00000 | 0.00281 |
| Kidney | FGFR1  | AMP    | 3  | 510 | 0.00588 | 0.02816 | 1  | 322 | 0.00311 | 0.02554 |
| Kidney | FGFR1  | FUSION | 0  | 510 | 0.00000 | 0.00013 | 0  | 322 | 0.00000 | 0.00039 |
| Kidney | FGFR2  | AMP    | 0  | 510 | 0.00000 | 0.00347 | 0  | 322 | 0.00000 | 0.00358 |
| Kidney | FGFR2  | FUSION | 0  | 510 | 0.00000 | 0.00083 | 0  | 322 | 0.00000 | 0.00300 |
| Kidney | FGFR2  | MUT    | 0  | 510 | 0.00000 | 0.00531 | 0  | 322 | 0.00000 | 0.00435 |
| Kidney | FGFR3  | AMP    | 0  | 510 | 0.00000 | 0.00263 | 0  | 322 | 0.00000 | 0.00387 |
| Kidney | FGFR3  | FUSION | 0  | 510 | 0.00000 | 0.00294 | 0  | 322 | 0.00000 | 0.00271 |
| Kidney | FGFR3  | MUT    | 0  | 510 | 0.00000 | 0.00588 | 0  | 322 | 0.00000 | 0.01200 |
| Kidney | FGFR4  | AMP    | 0  | 510 | 0.00000 | 0.00075 | 1  | 322 | 0.00311 | 0.00252 |
| Kidney | GNA11  | MUT    | 0  | 510 | 0.00000 | 0.00105 | 0  | 322 | 0.00000 | 0.00184 |
| Kidney | GNAQ   | MUT    | 0  | 510 | 0.00000 | 0.00096 | 0  | 322 | 0.00000 | 0.00281 |
| Kidney | HRAS   | MUT    | 0  | 510 | 0.00000 | 0.00504 | 0  | 322 | 0.00000 | 0.00658 |
| Kidney | IDH1   | MUT    | 0  | 510 | 0.00000 | 0.01776 | 0  | 322 | 0.00000 | 0.02351 |
| Kidney | IDH2   | MUT    | 0  | 510 | 0.00000 | 0.00281 | 0  | 322 | 0.00000 | 0.00290 |
| Kidney | JAK1   | MUT    | 0  | 510 | 0.00000 | 0.00026 | 1  | 322 | 0.00311 | 0.00755 |
| Kidney | JAK2   | MUT    | 2  | 510 | 0.00392 | 0.00066 | 0  | 322 | 0.00000 | 0.00019 |
| Kidney | KIT    | AMP    | 6  | 510 | 0.01176 | 0.00675 | 0  | 322 | 0.00000 | 0.00832 |
| Kidney | KIT    | MUT    | 0  | 510 | 0.00000 | 0.00675 | 0  | 322 | 0.00000 | 0.01335 |
| Kidney | KRAS   | AMP    | 0  | 510 | 0.00000 | 0.01614 | 0  | 322 | 0.00000 | 0.01809 |
| Kidney | KRAS   | MUT    | 5  | 510 | 0.00980 | 0.17580 | 2  | 322 | 0.00621 | 0.15257 |
| Kidney | MAP2K1 | MUT    | 0  | 510 | 0.00000 | 0.00412 | 1  | 322 | 0.00311 | 0.00629 |
| Kidney | MAP2K2 | MUT    | 0  | 510 | 0.00000 | 0.00022 | 0  | 322 | 0.00000 | 0.00058 |
| Kidney | MAP2K4 | MUT    | 0  | 510 | 0.00000 | 0.00092 | 0  | 322 | 0.00000 | 0.00687 |
| Kidney | MAPK1  | MUT    | 0  | 510 | 0.00000 | 0.00079 | 0  | 322 | 0.00000 | 0.00116 |
| Kidney | MDM2   | AMP    | 3  | 510 | 0.00588 | 0.02772 | 1  | 322 | 0.00311 | 0.03696 |
| Kidney | MET    | AMP    | 3  | 510 | 0.00588 | 0.00693 | 6  | 322 | 0.01863 | 0.00948 |
| Kidney | MET    | MUT    | 0  | 510 | 0.00000 | 0.00355 | 0  | 322 | 0.00000 | 0.00300 |
| Kidney | MTOR   | MUT    | 8  | 510 | 0.01569 | 0.00390 | 18 | 322 | 0.05590 | 0.00619 |
| Kidney | MYC    | AMP    | 2  | 510 | 0.00392 | 0.04066 | 4  | 322 | 0.01242 | 0.03957 |
| Kidney | MYCN   | AMP    | 0  | 510 | 0.00000 | 0.00325 | 0  | 322 | 0.00000 | 0.00484 |
| Kidney | MYD88  | MUT    | 0  | 510 | 0.00000 | 0.00118 | 0  | 322 | 0.00000 | 0.00145 |
| Kidney | NOTCH1 | FUSION | 0  | 510 | 0.00000 | 0.00018 | 0  | 322 | 0.00000 | 0.00048 |
| Kidney | NRAS   | MUT    | 0  | 510 | 0.00000 | 0.02048 | 0  | 322 | 0.00000 | 0.02070 |
| Kidney | NRG1   | FUSION | 0  | 510 | 0.00000 | 0.00039 | 0  | 322 | 0.00000 | 0.00039 |
| Kidney | NTRK1  | FUSION | 0  | 510 | 0.00000 | 0.00026 | 0  | 322 | 0.00000 | 0.00097 |
| Kidney | NTRK3  | FUSION | 0  | 510 | 0.00000 | 0.00066 | 0  | 322 | 0.00000 | 0.00097 |
| Kidney | PDGFRA | AMP    | 8  | 510 | 0.01569 | 0.00627 | 0  | 322 | 0.00000 | 0.00851 |
| Kidney | PDGFRA | MUT    | 0  | 510 | 0.00000 | 0.00048 | 0  | 322 | 0.00000 | 0.00223 |
| Kidney | PIK3CA | AMP    | 0  | 510 | 0.00000 | 0.02298 | 0  | 322 | 0.00000 | 0.00697 |
| Kidney | PIK3CA | MUT    | 21 | 510 | 0.04118 | 0.12387 | 13 | 322 | 0.04037 | 0.11474 |
| Kidney | POLE   | MUT    | 0  | 510 | 0.00000 | 0.00079 | 0  | 322 | 0.00000 | 0.00252 |
| Kidney | PRKACA | FUSION | 0  | 510 | 0.00000 | 0.00039 | 0  | 322 | 0.00000 | 0.00087 |
| Kidney | PTEN   | HOMDEL | 4  | 510 | 0.00784 | 0.03228 | 1  | 322 | 0.00311 | 0.02390 |
| Kidney | PTEN   | MUT    | 30 | 510 | 0.05882 | 0.06536 | 19 | 322 | 0.05901 | 0.05563 |
| Kidney | RAF1   | MUT    | 0  | 510 | 0.00000 | 0.00154 | 0  | 322 | 0.00000 | 0.00261 |
| Kidney | RB1    | HOMDEL | 4  | 510 | 0.00784 | 0.02298 | 0  | 322 | 0.00000 | 0.01896 |
| Kidney | RB1    | MUT    | 4  | 510 | 0.00784 | 0.04053 | 2  | 322 | 0.00621 | 0.04092 |
| Kidney | RET    | FUSION | 0  | 510 | 0.00000 | 0.00219 | 0  | 322 | 0.00000 | 0.00281 |
| Kidney | RET    | MUT    | 0  | 510 | 0.00000 | 0.00175 | 0  | 322 | 0.00000 | 0.00213 |
| Kidney | RIT1   | MUT    | 0  | 510 | 0.00000 | 0.00105 | 0  | 322 | 0.00000 | 0.00126 |
| Kidney | ROS1   | FUSION | 0  | 510 | 0.00000 | 0.00149 | 0  | 322 | 0.00000 | 0.00358 |
| Kidney | ROS1   | MUT    | 0  | 510 | 0.00000 | 0.00009 | 0  | 322 | 0.00000 | 0.00019 |
| Kidney | SF3B1  | MUT    | 2  | 510 | 0.00392 | 0.00807 | 2  | 322 | 0.00621 | 0.00803 |
| Kidney | SMO    | MUT    | 0  | 510 | 0.00000 | 0.00013 | 0  | 322 | 0.00000 | 0.00039 |
| Kidney | SPOP   | MUT    | 0  | 510 | 0.00000 | 0.00355 | 0  | 322 | 0.00000 | 0.00793 |

|              |        |        |     |      |         |         |     |      |         |         |
|--------------|--------|--------|-----|------|---------|---------|-----|------|---------|---------|
| Kidney       | TERT   | FUSION | 0   | 510  | 0.00000 | 0.00009 | 0   | 322  | 0.00000 | 0.00000 |
| Kidney       | TERT   | MUT    | 41  | 510  | 0.08039 | 0.09795 | 38  | 322  | 0.11801 | 0.12307 |
| Kidney       | TP53   | HOMDEL | 1   | 510  | 0.00196 | 0.01276 | 0   | 322  | 0.00000 | 0.00900 |
| Kidney       | TP53   | MUT    | 72  | 510  | 0.14118 | 0.52404 | 47  | 322  | 0.14596 | 0.41428 |
| Lung - NSCLC | AKT1   | MUT    | 8   | 2784 | 0.00287 | 0.01026 | 4   | 1539 | 0.00260 | 0.01045 |
| Lung - NSCLC | ALK    | AMP    | 1   | 2784 | 0.00036 | 0.00018 | 0   | 1539 | 0.00000 | 0.00039 |
| Lung - NSCLC | ALK    | FUSION | 115 | 2784 | 0.04131 | 0.00570 | 43  | 1539 | 0.02794 | 0.00474 |
| Lung - NSCLC | ALK    | MUT    | 13  | 2784 | 0.00467 | 0.00061 | 2   | 1539 | 0.00130 | 0.00184 |
| Lung - NSCLC | AR     | AMP    | 2   | 2784 | 0.00072 | 0.00601 | 1   | 1539 | 0.00065 | 0.00842 |
| Lung - NSCLC | AR     | MUT    | 0   | 2784 | 0.00000 | 0.00136 | 0   | 1539 | 0.00000 | 0.00213 |
| Lung - NSCLC | ARAF   | MUT    | 3   | 2784 | 0.00108 | 0.00039 | 2   | 1539 | 0.00130 | 0.00068 |
| Lung - NSCLC | BRAF   | AMP    | 4   | 2784 | 0.00144 | 0.00250 | 4   | 1539 | 0.00260 | 0.00164 |
| Lung - NSCLC | BRAF   | FUSION | 1   | 2784 | 0.00036 | 0.00118 | 6   | 1539 | 0.00390 | 0.00368 |
| Lung - NSCLC | BRAF   | MUT    | 91  | 2784 | 0.03269 | 0.04106 | 63  | 1539 | 0.04094 | 0.04247 |
| Lung - NSCLC | CCND1  | AMP    | 103 | 2784 | 0.03700 | 0.04299 | 40  | 1539 | 0.02599 | 0.04189 |
| Lung - NSCLC | CDK4   | AMP    | 79  | 2784 | 0.02838 | 0.01921 | 63  | 1539 | 0.04094 | 0.02632 |
| Lung - NSCLC | CDK4   | MUT    | 5   | 2784 | 0.00180 | 0.00061 | 4   | 1539 | 0.00260 | 0.00116 |
| Lung - NSCLC | CDK6   | AMP    | 15  | 2784 | 0.00539 | 0.00697 | 5   | 1539 | 0.00325 | 0.00590 |
| Lung - NSCLC | CDKN2A | HOMDEL | 476 | 2784 | 0.17098 | 0.12234 | 123 | 1539 | 0.07992 | 0.07498 |
| Lung - NSCLC | CDKN2A | MUT    | 231 | 2784 | 0.08297 | 0.04917 | 92  | 1539 | 0.05978 | 0.03599 |
| Lung - NSCLC | CTNNB1 | MUT    | 71  | 2784 | 0.02550 | 0.02601 | 46  | 1539 | 0.02989 | 0.02254 |
| Lung - NSCLC | EGFR   | AMP    | 134 | 2784 | 0.04813 | 0.02996 | 111 | 1539 | 0.07212 | 0.03154 |
| Lung - NSCLC | EGFR   | MUT    | 465 | 2784 | 0.16703 | 0.02649 | 336 | 1539 | 0.21832 | 0.04112 |
| Lung - NSCLC | ERBB2  | AMP    | 35  | 2784 | 0.01257 | 0.03202 | 38  | 1539 | 0.02469 | 0.03938 |
| Lung - NSCLC | ERBB2  | MUT    | 55  | 2784 | 0.01976 | 0.01689 | 41  | 1539 | 0.02664 | 0.01945 |
| Lung - NSCLC | ERBB3  | MUT    | 5   | 2784 | 0.00180 | 0.00561 | 4   | 1539 | 0.00260 | 0.00987 |
| Lung - NSCLC | ERBB4  | MUT    | 0   | 2784 | 0.00000 | 0.00022 | 0   | 1539 | 0.00000 | 0.00155 |
| Lung - NSCLC | ESR1   | MUT    | 0   | 2784 | 0.00000 | 0.00965 | 0   | 1539 | 0.00000 | 0.01006 |
| Lung - NSCLC | EZH2   | MUT    | 1   | 2784 | 0.00036 | 0.00140 | 1   | 1539 | 0.00065 | 0.00281 |
| Lung - NSCLC | FGFR1  | AMP    | 74  | 2784 | 0.02658 | 0.02816 | 29  | 1539 | 0.01884 | 0.02554 |
| Lung - NSCLC | FGFR1  | FUSION | 1   | 2784 | 0.00036 | 0.00013 | 1   | 1539 | 0.00065 | 0.00039 |
| Lung - NSCLC | FGFR2  | AMP    | 1   | 2784 | 0.00036 | 0.00347 | 1   | 1539 | 0.00065 | 0.00358 |
| Lung - NSCLC | FGFR2  | FUSION | 0   | 2784 | 0.00000 | 0.00083 | 1   | 1539 | 0.00065 | 0.00300 |
| Lung - NSCLC | FGFR2  | MUT    | 3   | 2784 | 0.00108 | 0.00531 | 2   | 1539 | 0.00130 | 0.00435 |
| Lung - NSCLC | FGFR3  | AMP    | 4   | 2784 | 0.00144 | 0.00263 | 5   | 1539 | 0.00325 | 0.00387 |
| Lung - NSCLC | FGFR3  | FUSION | 11  | 2784 | 0.00395 | 0.00294 | 5   | 1539 | 0.00325 | 0.00271 |
| Lung - NSCLC | FGFR3  | MUT    | 12  | 2784 | 0.00431 | 0.00588 | 5   | 1539 | 0.00325 | 0.01200 |
| Lung - NSCLC | FGFR4  | AMP    | 4   | 2784 | 0.00144 | 0.00075 | 7   | 1539 | 0.00455 | 0.00252 |
| Lung - NSCLC | GNA11  | MUT    | 1   | 2784 | 0.00036 | 0.00105 | 0   | 1539 | 0.00000 | 0.00184 |
| Lung - NSCLC | GNAQ   | MUT    | 1   | 2784 | 0.00036 | 0.00096 | 0   | 1539 | 0.00000 | 0.00281 |
| Lung - NSCLC | HRAS   | MUT    | 7   | 2784 | 0.00251 | 0.00504 | 2   | 1539 | 0.00130 | 0.00658 |
| Lung - NSCLC | IDH1   | MUT    | 12  | 2784 | 0.00431 | 0.01776 | 5   | 1539 | 0.00325 | 0.02351 |
| Lung - NSCLC | IDH2   | MUT    | 3   | 2784 | 0.00108 | 0.00281 | 0   | 1539 | 0.00000 | 0.00290 |
| Lung - NSCLC | JAK1   | MUT    | 0   | 2784 | 0.00000 | 0.00026 | 6   | 1539 | 0.00390 | 0.00755 |
| Lung - NSCLC | JAK2   | MUT    | 1   | 2784 | 0.00036 | 0.00066 | 1   | 1539 | 0.00065 | 0.00019 |
| Lung - NSCLC | KIT    | AMP    | 19  | 2784 | 0.00682 | 0.00675 | 6   | 1539 | 0.00390 | 0.00832 |
| Lung - NSCLC | KIT    | MUT    | 6   | 2784 | 0.00216 | 0.00675 | 2   | 1539 | 0.00130 | 0.01335 |
| Lung - NSCLC | KRAS   | AMP    | 34  | 2784 | 0.01221 | 0.01614 | 25  | 1539 | 0.01624 | 0.01809 |
| Lung - NSCLC | KRAS   | MUT    | 702 | 2784 | 0.25216 | 0.17580 | 425 | 1539 | 0.27615 | 0.15257 |
| Lung - NSCLC | MAP2K1 | MUT    | 10  | 2784 | 0.00359 | 0.00412 | 12  | 1539 | 0.00780 | 0.00629 |
| Lung - NSCLC | MAP2K2 | MUT    | 1   | 2784 | 0.00036 | 0.00022 | 0   | 1539 | 0.00000 | 0.00058 |
| Lung - NSCLC | MAP2K4 | MUT    | 1   | 2784 | 0.00036 | 0.00092 | 7   | 1539 | 0.00455 | 0.00687 |
| Lung - NSCLC | MAPK1  | MUT    | 1   | 2784 | 0.00036 | 0.00079 | 1   | 1539 | 0.00065 | 0.00116 |
| Lung - NSCLC | MDM2   | AMP    | 103 | 2784 | 0.03700 | 0.02772 | 85  | 1539 | 0.05523 | 0.03696 |
| Lung - NSCLC | MET    | AMP    | 50  | 2784 | 0.01796 | 0.00693 | 40  | 1539 | 0.02599 | 0.00948 |
| Lung - NSCLC | MET    | MUT    | 75  | 2784 | 0.02694 | 0.00355 | 30  | 1539 | 0.01949 | 0.00300 |
| Lung - NSCLC | MTOR   | MUT    | 8   | 2784 | 0.00287 | 0.00390 | 7   | 1539 | 0.00455 | 0.00619 |
| Lung - NSCLC | MYC    | AMP    | 117 | 2784 | 0.04203 | 0.04066 | 84  | 1539 | 0.05458 | 0.03957 |
| Lung - NSCLC | MYCN   | AMP    | 9   | 2784 | 0.00323 | 0.00325 | 1   | 1539 | 0.00065 | 0.00484 |
| Lung - NSCLC | MYD88  | MUT    | 1   | 2784 | 0.00036 | 0.00118 | 2   | 1539 | 0.00130 | 0.00145 |
| Lung - NSCLC | NOTCH1 | FUSION | 0   | 2784 | 0.00000 | 0.00018 | 0   | 1539 | 0.00000 | 0.00048 |
| Lung - NSCLC | NRAS   | MUT    | 26  | 2784 | 0.00934 | 0.02048 | 16  | 1539 | 0.01040 | 0.02070 |
| Lung - NSCLC | NRG1   | FUSION | 7   | 2784 | 0.00251 | 0.00039 | 2   | 1539 | 0.00130 | 0.00039 |
| Lung - NSCLC | NTRK1  | FUSION | 0   | 2784 | 0.00000 | 0.00026 | 2   | 1539 | 0.00130 | 0.00097 |
| Lung - NSCLC | NTRK3  | FUSION | 2   | 2784 | 0.00072 | 0.00066 | 0   | 1539 | 0.00000 | 0.00097 |
| Lung - NSCLC | PDGFRA | AMP    | 15  | 2784 | 0.00539 | 0.00627 | 2   | 1539 | 0.00130 | 0.00851 |
| Lung - NSCLC | PDGFRA | MUT    | 0   | 2784 | 0.00000 | 0.00048 | 1   | 1539 | 0.00065 | 0.00223 |
| Lung - NSCLC | PIK3CA | AMP    | 133 | 2784 | 0.04777 | 0.02298 | 25  | 1539 | 0.01624 | 0.00697 |
| Lung - NSCLC | PIK3CA | MUT    | 150 | 2784 | 0.05388 | 0.12387 | 94  | 1539 | 0.06108 | 0.11474 |
| Lung - NSCLC | POLE   | MUT    | 0   | 2784 | 0.00000 | 0.00079 | 2   | 1539 | 0.00130 | 0.00252 |
| Lung - NSCLC | PRKACA | FUSION | 0   | 2784 | 0.00000 | 0.00039 | 0   | 1539 | 0.00000 | 0.00087 |
| Lung - NSCLC | PTEN   | HOMDEL | 32  | 2784 | 0.01149 | 0.03228 | 13  | 1539 | 0.00845 | 0.02390 |
| Lung - NSCLC | PTEN   | MUT    | 94  | 2784 | 0.03376 | 0.06536 | 41  | 1539 | 0.02664 | 0.05563 |
| Lung - NSCLC | RAF1   | MUT    | 4   | 2784 | 0.00144 | 0.00154 | 5   | 1539 | 0.00325 | 0.00261 |
| Lung - NSCLC | RB1    | HOMDEL | 56  | 2784 | 0.02011 | 0.02298 | 19  | 1539 | 0.01235 | 0.01896 |
| Lung - NSCLC | RB1    | MUT    | 150 | 2784 | 0.05388 | 0.04053 | 72  | 1539 | 0.04678 | 0.04092 |

|              |        |        |      |      |         |         |     |      |         |         |
|--------------|--------|--------|------|------|---------|---------|-----|------|---------|---------|
| Lung - NSCLC | RET    | FUSION | 32   | 2784 | 0.01149 | 0.00219 | 18  | 1539 | 0.01170 | 0.00281 |
| Lung - NSCLC | RET    | MUT    | 1    | 2784 | 0.00036 | 0.00175 | 3   | 1539 | 0.00195 | 0.00213 |
| Lung - NSCLC | RIT1   | MUT    | 10   | 2784 | 0.00359 | 0.00105 | 1   | 1539 | 0.00065 | 0.00126 |
| Lung - NSCLC | ROS1   | FUSION | 26   | 2784 | 0.00934 | 0.00149 | 27  | 1539 | 0.01754 | 0.00358 |
| Lung - NSCLC | ROS1   | MUT    | 1    | 2784 | 0.00036 | 0.00009 | 1   | 1539 | 0.00065 | 0.00019 |
| Lung - NSCLC | SF3B1  | MUT    | 18   | 2784 | 0.00647 | 0.00807 | 7   | 1539 | 0.00455 | 0.00803 |
| Lung - NSCLC | SMO    | MUT    | 0    | 2784 | 0.00000 | 0.00013 | 0   | 1539 | 0.00000 | 0.00039 |
| Lung - NSCLC | SPOP   | MUT    | 2    | 2784 | 0.00072 | 0.00355 | 1   | 1539 | 0.00065 | 0.00793 |
| Lung - NSCLC | TERT   | FUSION | 0    | 2784 | 0.00000 | 0.00009 | 0   | 1539 | 0.00000 | 0.00000 |
| Lung - NSCLC | TERT   | MUT    | 73   | 2784 | 0.02622 | 0.09795 | 30  | 1539 | 0.01949 | 0.12307 |
| Lung - NSCLC | TP53   | HOMDEL | 24   | 2784 | 0.00862 | 0.01276 | 5   | 1539 | 0.00325 | 0.00900 |
| Lung - NSCLC | TP53   | MUT    | 1709 | 2784 | 0.61386 | 0.52404 | 848 | 1539 | 0.55101 | 0.41428 |
| Lung - SCLC  | AKT1   | MUT    | 3    | 433  | 0.00693 | 0.01026 | 0   | 81   | 0.00000 | 0.01045 |
| Lung - SCLC  | ALK    | AMP    | 0    | 433  | 0.00000 | 0.00018 | 0   | 81   | 0.00000 | 0.00039 |
| Lung - SCLC  | ALK    | FUSION | 2    | 433  | 0.00462 | 0.00570 | 0   | 81   | 0.00000 | 0.00474 |
| Lung - SCLC  | ALK    | MUT    | 0    | 433  | 0.00000 | 0.00061 | 1   | 81   | 0.01235 | 0.00184 |
| Lung - SCLC  | AR     | AMP    | 2    | 433  | 0.00462 | 0.00601 | 0   | 81   | 0.00000 | 0.00842 |
| Lung - SCLC  | AR     | MUT    | 0    | 433  | 0.00000 | 0.00136 | 0   | 81   | 0.00000 | 0.00213 |
| Lung - SCLC  | ARAF   | MUT    | 0    | 433  | 0.00000 | 0.00039 | 0   | 81   | 0.00000 | 0.00068 |
| Lung - SCLC  | BRAF   | AMP    | 2    | 433  | 0.00462 | 0.00250 | 0   | 81   | 0.00000 | 0.00164 |
| Lung - SCLC  | BRAF   | FUSION | 0    | 433  | 0.00000 | 0.00118 | 0   | 81   | 0.00000 | 0.00368 |
| Lung - SCLC  | BRAF   | MUT    | 1    | 433  | 0.00231 | 0.04106 | 1   | 81   | 0.01235 | 0.04247 |
| Lung - SCLC  | CCND1  | AMP    | 5    | 433  | 0.01155 | 0.04299 | 2   | 81   | 0.02469 | 0.04189 |
| Lung - SCLC  | CDK4   | AMP    | 2    | 433  | 0.00462 | 0.01921 | 0   | 81   | 0.00000 | 0.02632 |
| Lung - SCLC  | CDK4   | MUT    | 0    | 433  | 0.00000 | 0.00061 | 1   | 81   | 0.01235 | 0.00116 |
| Lung - SCLC  | CDK6   | AMP    | 0    | 433  | 0.00000 | 0.00697 | 0   | 81   | 0.00000 | 0.00590 |
| Lung - SCLC  | CDKN2A | HOMDEL | 26   | 433  | 0.06005 | 0.12234 | 3   | 81   | 0.03704 | 0.07498 |
| Lung - SCLC  | CDKN2A | MUT    | 9    | 433  | 0.02079 | 0.04917 | 0   | 81   | 0.00000 | 0.03599 |
| Lung - SCLC  | CTNNA1 | MUT    | 2    | 433  | 0.00462 | 0.02601 | 0   | 81   | 0.00000 | 0.02254 |
| Lung - SCLC  | EGFR   | AMP    | 1    | 433  | 0.00231 | 0.02996 | 0   | 81   | 0.00000 | 0.03154 |
| Lung - SCLC  | EGFR   | MUT    | 8    | 433  | 0.01848 | 0.02649 | 1   | 81   | 0.01235 | 0.04112 |
| Lung - SCLC  | ERBB2  | AMP    | 3    | 433  | 0.00693 | 0.03202 | 0   | 81   | 0.00000 | 0.03938 |
| Lung - SCLC  | ERBB2  | MUT    | 0    | 433  | 0.00000 | 0.01689 | 0   | 81   | 0.00000 | 0.01945 |
| Lung - SCLC  | ERBB3  | MUT    | 0    | 433  | 0.00000 | 0.00561 | 0   | 81   | 0.00000 | 0.00987 |
| Lung - SCLC  | ERBB4  | MUT    | 0    | 433  | 0.00000 | 0.00022 | 0   | 81   | 0.00000 | 0.00155 |
| Lung - SCLC  | ESR1   | MUT    | 0    | 433  | 0.00000 | 0.00965 | 0   | 81   | 0.00000 | 0.01006 |
| Lung - SCLC  | EZH2   | MUT    | 0    | 433  | 0.00000 | 0.00140 | 0   | 81   | 0.00000 | 0.00281 |
| Lung - SCLC  | FGFR1  | AMP    | 12   | 433  | 0.02771 | 0.02816 | 2   | 81   | 0.02469 | 0.02554 |
| Lung - SCLC  | FGFR1  | FUSION | 0    | 433  | 0.00000 | 0.00013 | 0   | 81   | 0.00000 | 0.00039 |
| Lung - SCLC  | FGFR2  | AMP    | 0    | 433  | 0.00000 | 0.00347 | 0   | 81   | 0.00000 | 0.00358 |
| Lung - SCLC  | FGFR2  | FUSION | 0    | 433  | 0.00000 | 0.00083 | 0   | 81   | 0.00000 | 0.00300 |
| Lung - SCLC  | FGFR2  | MUT    | 2    | 433  | 0.00462 | 0.00531 | 0   | 81   | 0.00000 | 0.00435 |
| Lung - SCLC  | FGFR3  | AMP    | 0    | 433  | 0.00000 | 0.00263 | 1   | 81   | 0.01235 | 0.00387 |
| Lung - SCLC  | FGFR3  | FUSION | 0    | 433  | 0.00000 | 0.00294 | 0   | 81   | 0.00000 | 0.00271 |
| Lung - SCLC  | FGFR3  | MUT    | 1    | 433  | 0.00231 | 0.00588 | 0   | 81   | 0.00000 | 0.01200 |
| Lung - SCLC  | FGFR4  | AMP    | 0    | 433  | 0.00000 | 0.00075 | 0   | 81   | 0.00000 | 0.00252 |
| Lung - SCLC  | GNA11  | MUT    | 0    | 433  | 0.00000 | 0.00105 | 0   | 81   | 0.00000 | 0.00184 |
| Lung - SCLC  | GNAQ   | MUT    | 0    | 433  | 0.00000 | 0.00096 | 0   | 81   | 0.00000 | 0.00281 |
| Lung - SCLC  | HRAS   | MUT    | 2    | 433  | 0.00462 | 0.00504 | 0   | 81   | 0.00000 | 0.00658 |
| Lung - SCLC  | IDH1   | MUT    | 0    | 433  | 0.00000 | 0.01776 | 0   | 81   | 0.00000 | 0.02351 |
| Lung - SCLC  | IDH2   | MUT    | 0    | 433  | 0.00000 | 0.00281 | 0   | 81   | 0.00000 | 0.00290 |
| Lung - SCLC  | JAK1   | MUT    | 0    | 433  | 0.00000 | 0.00026 | 0   | 81   | 0.00000 | 0.00755 |
| Lung - SCLC  | JAK2   | MUT    | 0    | 433  | 0.00000 | 0.00066 | 0   | 81   | 0.00000 | 0.00019 |
| Lung - SCLC  | KIT    | AMP    | 7    | 433  | 0.01617 | 0.00675 | 2   | 81   | 0.02469 | 0.00832 |
| Lung - SCLC  | KIT    | MUT    | 1    | 433  | 0.00231 | 0.00675 | 0   | 81   | 0.00000 | 0.01335 |
| Lung - SCLC  | KRAS   | AMP    | 6    | 433  | 0.01386 | 0.01614 | 0   | 81   | 0.00000 | 0.01809 |
| Lung - SCLC  | KRAS   | MUT    | 28   | 433  | 0.06467 | 0.17580 | 0   | 81   | 0.00000 | 0.15257 |
| Lung - SCLC  | MAP2K1 | MUT    | 0    | 433  | 0.00000 | 0.00412 | 0   | 81   | 0.00000 | 0.00629 |
| Lung - SCLC  | MAP2K2 | MUT    | 0    | 433  | 0.00000 | 0.00022 | 0   | 81   | 0.00000 | 0.00058 |
| Lung - SCLC  | MAP2K4 | MUT    | 0    | 433  | 0.00000 | 0.00092 | 1   | 81   | 0.01235 | 0.00687 |
| Lung - SCLC  | MAPK1  | MUT    | 0    | 433  | 0.00000 | 0.00079 | 0   | 81   | 0.00000 | 0.00116 |
| Lung - SCLC  | MDM2   | AMP    | 5    | 433  | 0.01155 | 0.02772 | 0   | 81   | 0.00000 | 0.03696 |
| Lung - SCLC  | MET    | AMP    | 1    | 433  | 0.00231 | 0.00693 | 0   | 81   | 0.00000 | 0.00948 |
| Lung - SCLC  | MET    | MUT    | 1    | 433  | 0.00231 | 0.00355 | 0   | 81   | 0.00000 | 0.00300 |
| Lung - SCLC  | MTOR   | MUT    | 0    | 433  | 0.00000 | 0.00390 | 1   | 81   | 0.01235 | 0.00619 |
| Lung - SCLC  | MYC    | AMP    | 24   | 433  | 0.05543 | 0.04066 | 1   | 81   | 0.01235 | 0.03957 |
| Lung - SCLC  | MYCN   | AMP    | 14   | 433  | 0.03233 | 0.00325 | 0   | 81   | 0.00000 | 0.00484 |
| Lung - SCLC  | MYD88  | MUT    | 1    | 433  | 0.00231 | 0.00118 | 0   | 81   | 0.00000 | 0.00145 |
| Lung - SCLC  | NOTCH1 | FUSION | 0    | 433  | 0.00000 | 0.00018 | 0   | 81   | 0.00000 | 0.00048 |
| Lung - SCLC  | NRAS   | MUT    | 1    | 433  | 0.00231 | 0.02048 | 0   | 81   | 0.00000 | 0.02070 |
| Lung - SCLC  | NRG1   | FUSION | 0    | 433  | 0.00000 | 0.00039 | 0   | 81   | 0.00000 | 0.00039 |
| Lung - SCLC  | NTRK1  | FUSION | 0    | 433  | 0.00000 | 0.00026 | 0   | 81   | 0.00000 | 0.00097 |
| Lung - SCLC  | NTRK3  | FUSION | 0    | 433  | 0.00000 | 0.00066 | 0   | 81   | 0.00000 | 0.00097 |
| Lung - SCLC  | PDGFRA | AMP    | 6    | 433  | 0.01386 | 0.00627 | 2   | 81   | 0.02469 | 0.00851 |
| Lung - SCLC  | PDGFRA | MUT    | 0    | 433  | 0.00000 | 0.00048 | 0   | 81   | 0.00000 | 0.00223 |
| Lung - SCLC  | PIK3CA | AMP    | 17   | 433  | 0.03926 | 0.02298 | 3   | 81   | 0.03704 | 0.00697 |

|             |        |        |     |     |         |         |    |     |         |         |
|-------------|--------|--------|-----|-----|---------|---------|----|-----|---------|---------|
| Lung - SCLC | PIK3CA | MUT    | 19  | 433 | 0.04388 | 0.12387 | 2  | 81  | 0.02469 | 0.11474 |
| Lung - SCLC | POLE   | MUT    | 0   | 433 | 0.00000 | 0.00079 | 1  | 81  | 0.01235 | 0.00252 |
| Lung - SCLC | PRKACA | FUSION | 0   | 433 | 0.00000 | 0.00039 | 0  | 81  | 0.00000 | 0.00087 |
| Lung - SCLC | PTEN   | HOMDEL | 12  | 433 | 0.02771 | 0.03228 | 5  | 81  | 0.06173 | 0.02390 |
| Lung - SCLC | PTEN   | MUT    | 26  | 433 | 0.06005 | 0.06536 | 5  | 81  | 0.06173 | 0.05563 |
| Lung - SCLC | RAF1   | MUT    | 0   | 433 | 0.00000 | 0.00154 | 0  | 81  | 0.00000 | 0.00261 |
| Lung - SCLC | RB1    | HOMDEL | 48  | 433 | 0.11085 | 0.02298 | 14 | 81  | 0.17284 | 0.01896 |
| Lung - SCLC | RB1    | MUT    | 205 | 433 | 0.47344 | 0.04053 | 48 | 81  | 0.59259 | 0.04092 |
| Lung - SCLC | RET    | FUSION | 1   | 433 | 0.00231 | 0.00219 | 0  | 81  | 0.00000 | 0.00281 |
| Lung - SCLC | RET    | MUT    | 0   | 433 | 0.00000 | 0.00175 | 0  | 81  | 0.00000 | 0.00213 |
| Lung - SCLC | RIT1   | MUT    | 0   | 433 | 0.00000 | 0.00105 | 1  | 81  | 0.01235 | 0.00126 |
| Lung - SCLC | ROS1   | FUSION | 0   | 433 | 0.00000 | 0.00149 | 0  | 81  | 0.00000 | 0.00358 |
| Lung - SCLC | ROS1   | MUT    | 0   | 433 | 0.00000 | 0.00009 | 0  | 81  | 0.00000 | 0.00019 |
| Lung - SCLC | SF3B1  | MUT    | 0   | 433 | 0.00000 | 0.00807 | 0  | 81  | 0.00000 | 0.00803 |
| Lung - SCLC | SMO    | MUT    | 0   | 433 | 0.00000 | 0.00013 | 0  | 81  | 0.00000 | 0.00039 |
| Lung - SCLC | SPOP   | MUT    | 0   | 433 | 0.00000 | 0.00355 | 0  | 81  | 0.00000 | 0.00793 |
| Lung - SCLC | TERT   | FUSION | 0   | 433 | 0.00000 | 0.00009 | 0  | 81  | 0.00000 | 0.00000 |
| Lung - SCLC | TERT   | MUT    | 5   | 433 | 0.01155 | 0.09795 | 1  | 81  | 0.01235 | 0.12307 |
| Lung - SCLC | TP53   | HOMDEL | 8   | 433 | 0.01848 | 0.01276 | 4  | 81  | 0.04938 | 0.00900 |
| Lung - SCLC | TP53   | MUT    | 341 | 433 | 0.78753 | 0.52404 | 70 | 81  | 0.86420 | 0.41428 |
| Lymphoma    | AKT1   | MUT    | 0   | 182 | 0.00000 | 0.01026 | 1  | 171 | 0.00585 | 0.01045 |
| Lymphoma    | ALK    | AMP    | 0   | 182 | 0.00000 | 0.00018 | 0  | 171 | 0.00000 | 0.00039 |
| Lymphoma    | ALK    | FUSION | 0   | 182 | 0.00000 | 0.00570 | 0  | 171 | 0.00000 | 0.00474 |
| Lymphoma    | ALK    | MUT    | 0   | 182 | 0.00000 | 0.00061 | 0  | 171 | 0.00000 | 0.00184 |
| Lymphoma    | AR     | AMP    | 0   | 182 | 0.00000 | 0.00601 | 0  | 171 | 0.00000 | 0.00842 |
| Lymphoma    | AR     | MUT    | 0   | 182 | 0.00000 | 0.00136 | 0  | 171 | 0.00000 | 0.00213 |
| Lymphoma    | ARAF   | MUT    | 0   | 182 | 0.00000 | 0.00039 | 0  | 171 | 0.00000 | 0.00068 |
| Lymphoma    | BRAF   | AMP    | 0   | 182 | 0.00000 | 0.00250 | 0  | 171 | 0.00000 | 0.00164 |
| Lymphoma    | BRAF   | FUSION | 0   | 182 | 0.00000 | 0.00118 | 0  | 171 | 0.00000 | 0.00368 |
| Lymphoma    | BRAF   | MUT    | 8   | 182 | 0.04396 | 0.04106 | 7  | 171 | 0.04094 | 0.04247 |
| Lymphoma    | CCND1  | AMP    | 0   | 182 | 0.00000 | 0.04299 | 1  | 171 | 0.00585 | 0.04189 |
| Lymphoma    | CDK4   | AMP    | 3   | 182 | 0.01648 | 0.01921 | 0  | 171 | 0.00000 | 0.02632 |
| Lymphoma    | CDK4   | MUT    | 0   | 182 | 0.00000 | 0.00061 | 0  | 171 | 0.00000 | 0.00116 |
| Lymphoma    | CDK6   | AMP    | 2   | 182 | 0.01099 | 0.00697 | 2  | 171 | 0.01170 | 0.00590 |
| Lymphoma    | CDKN2A | HOMDEL | 25  | 182 | 0.13736 | 0.12234 | 20 | 171 | 0.11696 | 0.07498 |
| Lymphoma    | CDKN2A | MUT    | 2   | 182 | 0.01099 | 0.04917 | 3  | 171 | 0.01754 | 0.03599 |
| Lymphoma    | CTNNB1 | MUT    | 0   | 182 | 0.00000 | 0.02601 | 0  | 171 | 0.00000 | 0.02254 |
| Lymphoma    | EGFR   | AMP    | 0   | 182 | 0.00000 | 0.02996 | 0  | 171 | 0.00000 | 0.03154 |
| Lymphoma    | EGFR   | MUT    | 0   | 182 | 0.00000 | 0.02649 | 1  | 171 | 0.00585 | 0.04112 |
| Lymphoma    | ERBB2  | AMP    | 0   | 182 | 0.00000 | 0.03202 | 0  | 171 | 0.00000 | 0.03938 |
| Lymphoma    | ERBB2  | MUT    | 0   | 182 | 0.00000 | 0.01689 | 0  | 171 | 0.00000 | 0.01945 |
| Lymphoma    | ERBB3  | MUT    | 0   | 182 | 0.00000 | 0.00561 | 0  | 171 | 0.00000 | 0.00987 |
| Lymphoma    | ERBB4  | MUT    | 0   | 182 | 0.00000 | 0.00022 | 0  | 171 | 0.00000 | 0.00155 |
| Lymphoma    | ESR1   | MUT    | 0   | 182 | 0.00000 | 0.00965 | 0  | 171 | 0.00000 | 0.01006 |
| Lymphoma    | EZH2   | MUT    | 19  | 182 | 0.10440 | 0.00140 | 9  | 171 | 0.05263 | 0.00281 |
| Lymphoma    | FGFR1  | AMP    | 0   | 182 | 0.00000 | 0.02816 | 0  | 171 | 0.00000 | 0.02554 |
| Lymphoma    | FGFR1  | FUSION | 0   | 182 | 0.00000 | 0.00013 | 0  | 171 | 0.00000 | 0.00039 |
| Lymphoma    | FGFR2  | AMP    | 0   | 182 | 0.00000 | 0.00347 | 0  | 171 | 0.00000 | 0.00358 |
| Lymphoma    | FGFR2  | FUSION | 0   | 182 | 0.00000 | 0.00083 | 0  | 171 | 0.00000 | 0.00300 |
| Lymphoma    | FGFR2  | MUT    | 0   | 182 | 0.00000 | 0.00531 | 0  | 171 | 0.00000 | 0.00435 |
| Lymphoma    | FGFR3  | AMP    | 0   | 182 | 0.00000 | 0.00263 | 0  | 171 | 0.00000 | 0.00387 |
| Lymphoma    | FGFR3  | FUSION | 0   | 182 | 0.00000 | 0.00294 | 0  | 171 | 0.00000 | 0.00271 |
| Lymphoma    | FGFR3  | MUT    | 0   | 182 | 0.00000 | 0.00588 | 0  | 171 | 0.00000 | 0.01200 |
| Lymphoma    | FGFR4  | AMP    | 0   | 182 | 0.00000 | 0.00075 | 0  | 171 | 0.00000 | 0.00252 |
| Lymphoma    | GNA11  | MUT    | 0   | 182 | 0.00000 | 0.00105 | 0  | 171 | 0.00000 | 0.00184 |
| Lymphoma    | GNAQ   | MUT    | 0   | 182 | 0.00000 | 0.00096 | 0  | 171 | 0.00000 | 0.00281 |
| Lymphoma    | HRAS   | MUT    | 0   | 182 | 0.00000 | 0.00504 | 0  | 171 | 0.00000 | 0.00658 |
| Lymphoma    | IDH1   | MUT    | 1   | 182 | 0.00549 | 0.01776 | 0  | 171 | 0.00000 | 0.02351 |
| Lymphoma    | IDH2   | MUT    | 1   | 182 | 0.00549 | 0.00281 | 7  | 171 | 0.04094 | 0.00290 |
| Lymphoma    | JAK1   | MUT    | 0   | 182 | 0.00000 | 0.00026 | 0  | 171 | 0.00000 | 0.00755 |
| Lymphoma    | JAK2   | MUT    | 0   | 182 | 0.00000 | 0.00066 | 0  | 171 | 0.00000 | 0.00019 |
| Lymphoma    | KIT    | AMP    | 0   | 182 | 0.00000 | 0.00675 | 0  | 171 | 0.00000 | 0.00832 |
| Lymphoma    | KIT    | MUT    | 0   | 182 | 0.00000 | 0.00675 | 0  | 171 | 0.00000 | 0.01335 |
| Lymphoma    | KRAS   | AMP    | 0   | 182 | 0.00000 | 0.01614 | 0  | 171 | 0.00000 | 0.01809 |
| Lymphoma    | KRAS   | MUT    | 6   | 182 | 0.03297 | 0.17580 | 3  | 171 | 0.01754 | 0.15257 |
| Lymphoma    | MAP2K1 | MUT    | 4   | 182 | 0.02198 | 0.00412 | 3  | 171 | 0.01754 | 0.00629 |
| Lymphoma    | MAP2K2 | MUT    | 0   | 182 | 0.00000 | 0.00022 | 0  | 171 | 0.00000 | 0.00058 |
| Lymphoma    | MAP2K4 | MUT    | 0   | 182 | 0.00000 | 0.00092 | 0  | 171 | 0.00000 | 0.00687 |
| Lymphoma    | MAPK1  | MUT    | 0   | 182 | 0.00000 | 0.00079 | 1  | 171 | 0.00585 | 0.00116 |
| Lymphoma    | MDM2   | AMP    | 1   | 182 | 0.00549 | 0.02772 | 1  | 171 | 0.00585 | 0.03696 |
| Lymphoma    | MET    | AMP    | 0   | 182 | 0.00000 | 0.00693 | 1  | 171 | 0.00585 | 0.00948 |
| Lymphoma    | MET    | MUT    | 0   | 182 | 0.00000 | 0.00355 | 0  | 171 | 0.00000 | 0.00300 |
| Lymphoma    | MTOR   | MUT    | 1   | 182 | 0.00549 | 0.00390 | 2  | 171 | 0.01170 | 0.00619 |
| Lymphoma    | MYC    | AMP    | 0   | 182 | 0.00000 | 0.04066 | 3  | 171 | 0.01754 | 0.03957 |
| Lymphoma    | MYCN   | AMP    | 0   | 182 | 0.00000 | 0.00325 | 0  | 171 | 0.00000 | 0.00484 |
| Lymphoma    | MYD88  | MUT    | 18  | 182 | 0.09890 | 0.00118 | 10 | 171 | 0.05848 | 0.00145 |

|          |        |        |     |     |         |         |     |     |         |         |
|----------|--------|--------|-----|-----|---------|---------|-----|-----|---------|---------|
| Lymphoma | NOTCH1 | FUSION | 0   | 182 | 0.00000 | 0.00018 | 0   | 171 | 0.00000 | 0.00048 |
| Lymphoma | NRAS   | MUT    | 4   | 182 | 0.02198 | 0.02048 | 1   | 171 | 0.00585 | 0.02070 |
| Lymphoma | NRG1   | FUSION | 0   | 182 | 0.00000 | 0.00039 | 0   | 171 | 0.00000 | 0.00039 |
| Lymphoma | NTRK1  | FUSION | 0   | 182 | 0.00000 | 0.00026 | 0   | 171 | 0.00000 | 0.00097 |
| Lymphoma | NTRK3  | FUSION | 0   | 182 | 0.00000 | 0.00066 | 0   | 171 | 0.00000 | 0.00097 |
| Lymphoma | PDGFRA | AMP    | 0   | 182 | 0.00000 | 0.00627 | 0   | 171 | 0.00000 | 0.00851 |
| Lymphoma | PDGFRA | MUT    | 0   | 182 | 0.00000 | 0.00048 | 0   | 171 | 0.00000 | 0.00223 |
| Lymphoma | PIK3CA | AMP    | 1   | 182 | 0.00549 | 0.02298 | 0   | 171 | 0.00000 | 0.00697 |
| Lymphoma | PIK3CA | MUT    | 1   | 182 | 0.00549 | 0.12387 | 1   | 171 | 0.00585 | 0.11474 |
| Lymphoma | POLE   | MUT    | 0   | 182 | 0.00000 | 0.00079 | 0   | 171 | 0.00000 | 0.00252 |
| Lymphoma | PRKACA | FUSION | 0   | 182 | 0.00000 | 0.00039 | 0   | 171 | 0.00000 | 0.00087 |
| Lymphoma | PTEN   | HOMDEL | 3   | 182 | 0.01648 | 0.03228 | 2   | 171 | 0.01170 | 0.02390 |
| Lymphoma | PTEN   | MUT    | 4   | 182 | 0.02198 | 0.06536 | 4   | 171 | 0.02339 | 0.05563 |
| Lymphoma | RAF1   | MUT    | 1   | 182 | 0.00549 | 0.00154 | 0   | 171 | 0.00000 | 0.00261 |
| Lymphoma | RB1    | HOMDEL | 3   | 182 | 0.01648 | 0.02298 | 2   | 171 | 0.01170 | 0.01896 |
| Lymphoma | RB1    | MUT    | 2   | 182 | 0.01099 | 0.04053 | 1   | 171 | 0.00585 | 0.04092 |
| Lymphoma | RET    | FUSION | 0   | 182 | 0.00000 | 0.00219 | 0   | 171 | 0.00000 | 0.00281 |
| Lymphoma | RET    | MUT    | 0   | 182 | 0.00000 | 0.00175 | 0   | 171 | 0.00000 | 0.00213 |
| Lymphoma | RIT1   | MUT    | 0   | 182 | 0.00000 | 0.00105 | 0   | 171 | 0.00000 | 0.00126 |
| Lymphoma | ROS1   | FUSION | 0   | 182 | 0.00000 | 0.00149 | 0   | 171 | 0.00000 | 0.00358 |
| Lymphoma | ROS1   | MUT    | 0   | 182 | 0.00000 | 0.00009 | 0   | 171 | 0.00000 | 0.00019 |
| Lymphoma | SF3B1  | MUT    | 3   | 182 | 0.01648 | 0.00807 | 1   | 171 | 0.00585 | 0.00803 |
| Lymphoma | SMO    | MUT    | 0   | 182 | 0.00000 | 0.00013 | 0   | 171 | 0.00000 | 0.00039 |
| Lymphoma | SPOP   | MUT    | 0   | 182 | 0.00000 | 0.00355 | 0   | 171 | 0.00000 | 0.00793 |
| Lymphoma | TERT   | FUSION | 0   | 182 | 0.00000 | 0.00009 | 0   | 171 | 0.00000 | 0.00000 |
| Lymphoma | TERT   | MUT    | 2   | 182 | 0.01099 | 0.09795 | 1   | 171 | 0.00585 | 0.12307 |
| Lymphoma | TP53   | HOMDEL | 2   | 182 | 0.01099 | 0.01276 | 3   | 171 | 0.01754 | 0.00900 |
| Lymphoma | TP53   | MUT    | 33  | 182 | 0.18132 | 0.52404 | 35  | 171 | 0.20468 | 0.41428 |
| Melanoma | AKT1   | MUT    | 0   | 697 | 0.00000 | 0.01026 | 0   | 349 | 0.00000 | 0.01045 |
| Melanoma | ALK    | AMP    | 0   | 697 | 0.00000 | 0.00018 | 0   | 349 | 0.00000 | 0.00039 |
| Melanoma | ALK    | FUSION | 0   | 697 | 0.00000 | 0.00570 | 0   | 349 | 0.00000 | 0.00474 |
| Melanoma | ALK    | MUT    | 0   | 697 | 0.00000 | 0.00061 | 1   | 349 | 0.00287 | 0.00184 |
| Melanoma | AR     | AMP    | 0   | 697 | 0.00000 | 0.00601 | 0   | 349 | 0.00000 | 0.00842 |
| Melanoma | AR     | MUT    | 0   | 697 | 0.00000 | 0.00136 | 0   | 349 | 0.00000 | 0.00213 |
| Melanoma | ARAF   | MUT    | 3   | 697 | 0.00430 | 0.00039 | 0   | 349 | 0.00000 | 0.00068 |
| Melanoma | BRAF   | AMP    | 13  | 697 | 0.01865 | 0.00250 | 4   | 349 | 0.01146 | 0.00164 |
| Melanoma | BRAF   | FUSION | 3   | 697 | 0.00430 | 0.00118 | 6   | 349 | 0.01719 | 0.00368 |
| Melanoma | BRAF   | MUT    | 263 | 697 | 0.37733 | 0.04106 | 102 | 349 | 0.29226 | 0.04247 |
| Melanoma | CCND1  | AMP    | 16  | 697 | 0.02296 | 0.04299 | 17  | 349 | 0.04871 | 0.04189 |
| Melanoma | CDK4   | AMP    | 24  | 697 | 0.03443 | 0.01921 | 11  | 349 | 0.03152 | 0.02632 |
| Melanoma | CDK4   | MUT    | 5   | 697 | 0.00717 | 0.00061 | 5   | 349 | 0.01433 | 0.00116 |
| Melanoma | CDK6   | AMP    | 2   | 697 | 0.00287 | 0.00697 | 3   | 349 | 0.00860 | 0.00590 |
| Melanoma | CDKN2A | HOMDEL | 165 | 697 | 0.23673 | 0.12234 | 61  | 349 | 0.17479 | 0.07498 |
| Melanoma | CDKN2A | MUT    | 97  | 697 | 0.13917 | 0.04917 | 46  | 349 | 0.13181 | 0.03599 |
| Melanoma | CTNNB1 | MUT    | 33  | 697 | 0.04735 | 0.02601 | 16  | 349 | 0.04585 | 0.02254 |
| Melanoma | EGFR   | AMP    | 0   | 697 | 0.00000 | 0.02996 | 2   | 349 | 0.00573 | 0.03154 |
| Melanoma | EGFR   | MUT    | 0   | 697 | 0.00000 | 0.02649 | 2   | 349 | 0.00573 | 0.04112 |
| Melanoma | ERBB2  | AMP    | 1   | 697 | 0.00143 | 0.03202 | 4   | 349 | 0.01146 | 0.03938 |
| Melanoma | ERBB2  | MUT    | 2   | 697 | 0.00287 | 0.01689 | 2   | 349 | 0.00573 | 0.01945 |
| Melanoma | ERBB3  | MUT    | 0   | 697 | 0.00000 | 0.00561 | 0   | 349 | 0.00000 | 0.00987 |
| Melanoma | ERBB4  | MUT    | 2   | 697 | 0.00287 | 0.00022 | 4   | 349 | 0.01146 | 0.00155 |
| Melanoma | ESR1   | MUT    | 0   | 697 | 0.00000 | 0.00965 | 0   | 349 | 0.00000 | 0.01006 |
| Melanoma | EZH2   | MUT    | 8   | 697 | 0.01148 | 0.00140 | 5   | 349 | 0.01433 | 0.00281 |
| Melanoma | FGFR1  | AMP    | 1   | 697 | 0.00143 | 0.02816 | 1   | 349 | 0.00287 | 0.02554 |
| Melanoma | FGFR1  | FUSION | 0   | 697 | 0.00000 | 0.00013 | 0   | 349 | 0.00000 | 0.00039 |
| Melanoma | FGFR2  | AMP    | 0   | 697 | 0.00000 | 0.00347 | 1   | 349 | 0.00287 | 0.00358 |
| Melanoma | FGFR2  | FUSION | 0   | 697 | 0.00000 | 0.00083 | 0   | 349 | 0.00000 | 0.00300 |
| Melanoma | FGFR2  | MUT    | 0   | 697 | 0.00000 | 0.00531 | 3   | 349 | 0.00860 | 0.00435 |
| Melanoma | FGFR3  | AMP    | 1   | 697 | 0.00143 | 0.00263 | 0   | 349 | 0.00000 | 0.00387 |
| Melanoma | FGFR3  | FUSION | 0   | 697 | 0.00000 | 0.00294 | 0   | 349 | 0.00000 | 0.00271 |
| Melanoma | FGFR3  | MUT    | 0   | 697 | 0.00000 | 0.00588 | 2   | 349 | 0.00573 | 0.01200 |
| Melanoma | FGFR4  | AMP    | 0   | 697 | 0.00000 | 0.00075 | 0   | 349 | 0.00000 | 0.00252 |
| Melanoma | GNA11  | MUT    | 21  | 697 | 0.03013 | 0.00105 | 19  | 349 | 0.05444 | 0.00184 |
| Melanoma | GNAQ   | MUT    | 21  | 697 | 0.03013 | 0.00096 | 28  | 349 | 0.08023 | 0.00281 |
| Melanoma | HRAS   | MUT    | 6   | 697 | 0.00861 | 0.00504 | 9   | 349 | 0.02579 | 0.00658 |
| Melanoma | IDH1   | MUT    | 14  | 697 | 0.02009 | 0.01776 | 8   | 349 | 0.02292 | 0.02351 |
| Melanoma | IDH2   | MUT    | 0   | 697 | 0.00000 | 0.00281 | 0   | 349 | 0.00000 | 0.00290 |
| Melanoma | JAK1   | MUT    | 1   | 697 | 0.00143 | 0.00026 | 2   | 349 | 0.00573 | 0.00755 |
| Melanoma | JAK2   | MUT    | 1   | 697 | 0.00143 | 0.00066 | 0   | 349 | 0.00000 | 0.00019 |
| Melanoma | KIT    | AMP    | 12  | 697 | 0.01722 | 0.00675 | 11  | 349 | 0.03152 | 0.00832 |
| Melanoma | KIT    | MUT    | 28  | 697 | 0.04017 | 0.00675 | 18  | 349 | 0.05158 | 0.01335 |
| Melanoma | KRAS   | AMP    | 5   | 697 | 0.00717 | 0.01614 | 4   | 349 | 0.01146 | 0.01809 |
| Melanoma | KRAS   | MUT    | 13  | 697 | 0.01865 | 0.17580 | 5   | 349 | 0.01433 | 0.15257 |
| Melanoma | MAP2K1 | MUT    | 15  | 697 | 0.02152 | 0.00412 | 17  | 349 | 0.04871 | 0.00629 |
| Melanoma | MAP2K2 | MUT    | 3   | 697 | 0.00430 | 0.00022 | 2   | 349 | 0.00573 | 0.00058 |
| Melanoma | MAP2K4 | MUT    | 0   | 697 | 0.00000 | 0.00092 | 0   | 349 | 0.00000 | 0.00687 |

|                   |        |        |     |     |         |         |     |     |         |         |
|-------------------|--------|--------|-----|-----|---------|---------|-----|-----|---------|---------|
| Melanoma          | MAPK1  | MUT    | 0   | 697 | 0.00000 | 0.00079 | 0   | 349 | 0.00000 | 0.00116 |
| Melanoma          | MDM2   | AMP    | 20  | 697 | 0.02869 | 0.02772 | 9   | 349 | 0.02579 | 0.03696 |
| Melanoma          | MET    | AMP    | 3   | 697 | 0.00430 | 0.00693 | 5   | 349 | 0.01433 | 0.00948 |
| Melanoma          | MET    | MUT    | 0   | 697 | 0.00000 | 0.00355 | 0   | 349 | 0.00000 | 0.00300 |
| Melanoma          | MTOR   | MUT    | 2   | 697 | 0.00287 | 0.00390 | 1   | 349 | 0.00287 | 0.00619 |
| Melanoma          | MYC    | AMP    | 9   | 697 | 0.01291 | 0.04066 | 21  | 349 | 0.06017 | 0.03957 |
| Melanoma          | MYCN   | AMP    | 1   | 697 | 0.00143 | 0.00325 | 0   | 349 | 0.00000 | 0.00484 |
| Melanoma          | MYD88  | MUT    | 0   | 697 | 0.00000 | 0.00118 | 0   | 349 | 0.00000 | 0.00145 |
| Melanoma          | NOTCH1 | FUSION | 0   | 697 | 0.00000 | 0.00018 | 0   | 349 | 0.00000 | 0.00048 |
| Melanoma          | NRAS   | MUT    | 163 | 697 | 0.23386 | 0.02048 | 74  | 349 | 0.21203 | 0.02070 |
| Melanoma          | NRG1   | FUSION | 0   | 697 | 0.00000 | 0.00039 | 0   | 349 | 0.00000 | 0.00039 |
| Melanoma          | NTRK1  | FUSION | 0   | 697 | 0.00000 | 0.00026 | 2   | 349 | 0.00573 | 0.00097 |
| Melanoma          | NTRK3  | FUSION | 0   | 697 | 0.00000 | 0.00066 | 0   | 349 | 0.00000 | 0.00097 |
| Melanoma          | PDGFRA | AMP    | 4   | 697 | 0.00574 | 0.00627 | 7   | 349 | 0.02006 | 0.00851 |
| Melanoma          | PDGFRA | MUT    | 0   | 697 | 0.00000 | 0.00048 | 0   | 349 | 0.00000 | 0.00223 |
| Melanoma          | PIK3CA | AMP    | 0   | 697 | 0.00000 | 0.02298 | 1   | 349 | 0.00287 | 0.00697 |
| Melanoma          | PIK3CA | MUT    | 14  | 697 | 0.02009 | 0.12387 | 7   | 349 | 0.02006 | 0.11474 |
| Melanoma          | POLE   | MUT    | 0   | 697 | 0.00000 | 0.00079 | 0   | 349 | 0.00000 | 0.00252 |
| Melanoma          | PRKACA | FUSION | 0   | 697 | 0.00000 | 0.00039 | 0   | 349 | 0.00000 | 0.00087 |
| Melanoma          | PTEN   | HOMDEL | 36  | 697 | 0.05165 | 0.03228 | 11  | 349 | 0.03152 | 0.02390 |
| Melanoma          | PTEN   | MUT    | 54  | 697 | 0.07747 | 0.06536 | 29  | 349 | 0.08309 | 0.05563 |
| Melanoma          | RAF1   | MUT    | 3   | 697 | 0.00430 | 0.00154 | 6   | 349 | 0.01719 | 0.00261 |
| Melanoma          | RB1    | HOMDEL | 2   | 697 | 0.00287 | 0.02298 | 1   | 349 | 0.00287 | 0.01896 |
| Melanoma          | RB1    | MUT    | 12  | 697 | 0.01722 | 0.04053 | 13  | 349 | 0.03725 | 0.04092 |
| Melanoma          | RET    | FUSION | 0   | 697 | 0.00000 | 0.00219 | 0   | 349 | 0.00000 | 0.00281 |
| Melanoma          | RET    | MUT    | 1   | 697 | 0.00143 | 0.00175 | 0   | 349 | 0.00000 | 0.00213 |
| Melanoma          | RIT1   | MUT    | 0   | 697 | 0.00000 | 0.00105 | 1   | 349 | 0.00287 | 0.00126 |
| Melanoma          | ROS1   | FUSION | 1   | 697 | 0.00143 | 0.00149 | 0   | 349 | 0.00000 | 0.00358 |
| Melanoma          | ROS1   | MUT    | 0   | 697 | 0.00000 | 0.00009 | 0   | 349 | 0.00000 | 0.00019 |
| Melanoma          | SF3B1  | MUT    | 26  | 697 | 0.03730 | 0.00807 | 29  | 349 | 0.08309 | 0.00803 |
| Melanoma          | SMO    | MUT    | 0   | 697 | 0.00000 | 0.00013 | 0   | 349 | 0.00000 | 0.00039 |
| Melanoma          | SPOP   | MUT    | 0   | 697 | 0.00000 | 0.00355 | 0   | 349 | 0.00000 | 0.00793 |
| Melanoma          | TERT   | FUSION | 1   | 697 | 0.00143 | 0.00009 | 0   | 349 | 0.00000 | 0.00000 |
| Melanoma          | TERT   | MUT    | 367 | 697 | 0.52654 | 0.09795 | 171 | 349 | 0.48997 | 0.12307 |
| Melanoma          | TP53   | HOMDEL | 1   | 697 | 0.00143 | 0.01276 | 1   | 349 | 0.00287 | 0.00900 |
| Melanoma          | TP53   | MUT    | 140 | 697 | 0.20086 | 0.52404 | 68  | 349 | 0.19484 | 0.41428 |
| Non-Melanoma Skin | AKT1   | MUT    | 2   | 132 | 0.01515 | 0.01026 | 0   | 141 | 0.00000 | 0.01045 |
| Non-Melanoma Skin | ALK    | AMP    | 0   | 132 | 0.00000 | 0.00018 | 0   | 141 | 0.00000 | 0.00039 |
| Non-Melanoma Skin | ALK    | FUSION | 0   | 132 | 0.00000 | 0.00570 | 0   | 141 | 0.00000 | 0.00474 |
| Non-Melanoma Skin | ALK    | MUT    | 0   | 132 | 0.00000 | 0.00061 | 1   | 141 | 0.00709 | 0.00184 |
| Non-Melanoma Skin | AR     | AMP    | 0   | 132 | 0.00000 | 0.00601 | 0   | 141 | 0.00000 | 0.00842 |
| Non-Melanoma Skin | AR     | MUT    | 0   | 132 | 0.00000 | 0.00136 | 0   | 141 | 0.00000 | 0.00213 |
| Non-Melanoma Skin | ARAF   | MUT    | 0   | 132 | 0.00000 | 0.00039 | 0   | 141 | 0.00000 | 0.00068 |
| Non-Melanoma Skin | BRAF   | AMP    | 0   | 132 | 0.00000 | 0.00250 | 0   | 141 | 0.00000 | 0.00164 |
| Non-Melanoma Skin | BRAF   | FUSION | 0   | 132 | 0.00000 | 0.00118 | 0   | 141 | 0.00000 | 0.00368 |
| Non-Melanoma Skin | BRAF   | MUT    | 3   | 132 | 0.02273 | 0.04106 | 1   | 141 | 0.00709 | 0.04247 |
| Non-Melanoma Skin | CCND1  | AMP    | 2   | 132 | 0.01515 | 0.04299 | 3   | 141 | 0.02128 | 0.04189 |
| Non-Melanoma Skin | CDK4   | AMP    | 0   | 132 | 0.00000 | 0.01921 | 1   | 141 | 0.00709 | 0.02632 |
| Non-Melanoma Skin | CDK4   | MUT    | 0   | 132 | 0.00000 | 0.00061 | 0   | 141 | 0.00000 | 0.00116 |
| Non-Melanoma Skin | CDK6   | AMP    | 0   | 132 | 0.00000 | 0.00697 | 0   | 141 | 0.00000 | 0.00590 |
| Non-Melanoma Skin | CDKN2A | HOMDEL | 11  | 132 | 0.08333 | 0.12234 | 3   | 141 | 0.02128 | 0.07498 |
| Non-Melanoma Skin | CDKN2A | MUT    | 37  | 132 | 0.28030 | 0.04917 | 28  | 141 | 0.19858 | 0.03599 |
| Non-Melanoma Skin | CTNNB1 | MUT    | 1   | 132 | 0.00758 | 0.02601 | 1   | 141 | 0.00709 | 0.02254 |
| Non-Melanoma Skin | EGFR   | AMP    | 8   | 132 | 0.06061 | 0.02996 | 2   | 141 | 0.01418 | 0.03154 |
| Non-Melanoma Skin | EGFR   | MUT    | 0   | 132 | 0.00000 | 0.02649 | 2   | 141 | 0.01418 | 0.04112 |
| Non-Melanoma Skin | ERBB2  | AMP    | 2   | 132 | 0.01515 | 0.03202 | 1   | 141 | 0.00709 | 0.03938 |
| Non-Melanoma Skin | ERBB2  | MUT    | 2   | 132 | 0.01515 | 0.01689 | 2   | 141 | 0.01418 | 0.01945 |
| Non-Melanoma Skin | ERBB3  | MUT    | 0   | 132 | 0.00000 | 0.00561 | 0   | 141 | 0.00000 | 0.00987 |
| Non-Melanoma Skin | ERBB4  | MUT    | 2   | 132 | 0.01515 | 0.00022 | 2   | 141 | 0.01418 | 0.00155 |
| Non-Melanoma Skin | ESR1   | MUT    | 0   | 132 | 0.00000 | 0.00965 | 1   | 141 | 0.00709 | 0.01006 |
| Non-Melanoma Skin | EZH2   | MUT    | 0   | 132 | 0.00000 | 0.00140 | 0   | 141 | 0.00000 | 0.00281 |
| Non-Melanoma Skin | FGFR1  | AMP    | 1   | 132 | 0.00758 | 0.02816 | 0   | 141 | 0.00000 | 0.02554 |
| Non-Melanoma Skin | FGFR1  | FUSION | 0   | 132 | 0.00000 | 0.00013 | 0   | 141 | 0.00000 | 0.00039 |
| Non-Melanoma Skin | FGFR2  | AMP    | 0   | 132 | 0.00000 | 0.00347 | 0   | 141 | 0.00000 | 0.00358 |
| Non-Melanoma Skin | FGFR2  | FUSION | 0   | 132 | 0.00000 | 0.00083 | 0   | 141 | 0.00000 | 0.00300 |
| Non-Melanoma Skin | FGFR2  | MUT    | 0   | 132 | 0.00000 | 0.00531 | 1   | 141 | 0.00709 | 0.00435 |
| Non-Melanoma Skin | FGFR3  | AMP    | 0   | 132 | 0.00000 | 0.00263 | 0   | 141 | 0.00000 | 0.00387 |
| Non-Melanoma Skin | FGFR3  | FUSION | 0   | 132 | 0.00000 | 0.00294 | 0   | 141 | 0.00000 | 0.00271 |
| Non-Melanoma Skin | FGFR3  | MUT    | 1   | 132 | 0.00758 | 0.00588 | 3   | 141 | 0.02128 | 0.01200 |
| Non-Melanoma Skin | FGFR4  | AMP    | 0   | 132 | 0.00000 | 0.00075 | 0   | 141 | 0.00000 | 0.00252 |
| Non-Melanoma Skin | GNA11  | MUT    | 1   | 132 | 0.00758 | 0.00105 | 0   | 141 | 0.00000 | 0.00184 |
| Non-Melanoma Skin | GNAQ   | MUT    | 0   | 132 | 0.00000 | 0.00096 | 0   | 141 | 0.00000 | 0.00281 |
| Non-Melanoma Skin | HRAS   | MUT    | 6   | 132 | 0.04545 | 0.00504 | 3   | 141 | 0.02128 | 0.00658 |
| Non-Melanoma Skin | IDH1   | MUT    | 1   | 132 | 0.00758 | 0.01776 | 0   | 141 | 0.00000 | 0.02351 |
| Non-Melanoma Skin | IDH2   | MUT    | 0   | 132 | 0.00000 | 0.00281 | 0   | 141 | 0.00000 | 0.00290 |
| Non-Melanoma Skin | JAK1   | MUT    | 0   | 132 | 0.00000 | 0.00026 | 3   | 141 | 0.02128 | 0.00755 |

|                   |        |        |    |      |         |         |    |     |         |         |
|-------------------|--------|--------|----|------|---------|---------|----|-----|---------|---------|
| Non-Melanoma Skin | JAK2   | MUT    | 0  | 132  | 0.00000 | 0.00066 | 0  | 141 | 0.00000 | 0.00019 |
| Non-Melanoma Skin | KIT    | AMP    | 0  | 132  | 0.00000 | 0.00675 | 0  | 141 | 0.00000 | 0.00832 |
| Non-Melanoma Skin | KIT    | MUT    | 1  | 132  | 0.00758 | 0.00675 | 0  | 141 | 0.00000 | 0.01335 |
| Non-Melanoma Skin | KRAS   | AMP    | 0  | 132  | 0.00000 | 0.01614 | 0  | 141 | 0.00000 | 0.01809 |
| Non-Melanoma Skin | KRAS   | MUT    | 5  | 132  | 0.03788 | 0.17580 | 0  | 141 | 0.00000 | 0.15257 |
| Non-Melanoma Skin | MAP2K1 | MUT    | 1  | 132  | 0.00758 | 0.00412 | 0  | 141 | 0.00000 | 0.00629 |
| Non-Melanoma Skin | MAP2K2 | MUT    | 0  | 132  | 0.00000 | 0.00022 | 0  | 141 | 0.00000 | 0.00058 |
| Non-Melanoma Skin | MAP2K4 | MUT    | 1  | 132  | 0.00758 | 0.00092 | 0  | 141 | 0.00000 | 0.00687 |
| Non-Melanoma Skin | MAPK1  | MUT    | 1  | 132  | 0.00758 | 0.00079 | 1  | 141 | 0.00709 | 0.00116 |
| Non-Melanoma Skin | MDM2   | AMP    | 0  | 132  | 0.00000 | 0.02772 | 0  | 141 | 0.00000 | 0.03696 |
| Non-Melanoma Skin | MET    | AMP    | 0  | 132  | 0.00000 | 0.00693 | 0  | 141 | 0.00000 | 0.00948 |
| Non-Melanoma Skin | MET    | MUT    | 0  | 132  | 0.00000 | 0.00355 | 0  | 141 | 0.00000 | 0.00300 |
| Non-Melanoma Skin | MTOR   | MUT    | 3  | 132  | 0.02273 | 0.00390 | 0  | 141 | 0.00000 | 0.00619 |
| Non-Melanoma Skin | MYC    | AMP    | 2  | 132  | 0.01515 | 0.04066 | 4  | 141 | 0.02837 | 0.03957 |
| Non-Melanoma Skin | MYCN   | AMP    | 0  | 132  | 0.00000 | 0.00325 | 2  | 141 | 0.01418 | 0.00484 |
| Non-Melanoma Skin | MYD88  | MUT    | 0  | 132  | 0.00000 | 0.00118 | 0  | 141 | 0.00000 | 0.00145 |
| Non-Melanoma Skin | NOTCH1 | FUSION | 0  | 132  | 0.00000 | 0.00018 | 0  | 141 | 0.00000 | 0.00048 |
| Non-Melanoma Skin | NRAS   | MUT    | 1  | 132  | 0.00758 | 0.02048 | 1  | 141 | 0.00709 | 0.02070 |
| Non-Melanoma Skin | NRG1   | FUSION | 0  | 132  | 0.00000 | 0.00039 | 0  | 141 | 0.00000 | 0.00039 |
| Non-Melanoma Skin | NTRK1  | FUSION | 0  | 132  | 0.00000 | 0.00026 | 0  | 141 | 0.00000 | 0.00097 |
| Non-Melanoma Skin | NTRK3  | FUSION | 0  | 132  | 0.00000 | 0.00066 | 0  | 141 | 0.00000 | 0.00097 |
| Non-Melanoma Skin | PDGFRA | AMP    | 0  | 132  | 0.00000 | 0.00627 | 0  | 141 | 0.00000 | 0.00851 |
| Non-Melanoma Skin | PDGFRA | MUT    | 0  | 132  | 0.00000 | 0.00048 | 0  | 141 | 0.00000 | 0.00223 |
| Non-Melanoma Skin | PIK3CA | AMP    | 0  | 132  | 0.00000 | 0.02298 | 0  | 141 | 0.00000 | 0.00697 |
| Non-Melanoma Skin | PIK3CA | MUT    | 12 | 132  | 0.09091 | 0.12387 | 14 | 141 | 0.09929 | 0.11474 |
| Non-Melanoma Skin | POLE   | MUT    | 0  | 132  | 0.00000 | 0.00079 | 0  | 141 | 0.00000 | 0.00252 |
| Non-Melanoma Skin | PRKACA | FUSION | 0  | 132  | 0.00000 | 0.00039 | 0  | 141 | 0.00000 | 0.00087 |
| Non-Melanoma Skin | PTEN   | HOMDEL | 3  | 132  | 0.02273 | 0.03228 | 1  | 141 | 0.00709 | 0.02390 |
| Non-Melanoma Skin | PTEN   | MUT    | 6  | 132  | 0.04545 | 0.06536 | 5  | 141 | 0.03546 | 0.05563 |
| Non-Melanoma Skin | RAF1   | MUT    | 1  | 132  | 0.00758 | 0.00154 | 0  | 141 | 0.00000 | 0.00261 |
| Non-Melanoma Skin | RB1    | HOMDEL | 3  | 132  | 0.02273 | 0.02298 | 5  | 141 | 0.03546 | 0.01896 |
| Non-Melanoma Skin | RB1    | MUT    | 16 | 132  | 0.12121 | 0.04053 | 19 | 141 | 0.13475 | 0.04092 |
| Non-Melanoma Skin | RET    | FUSION | 0  | 132  | 0.00000 | 0.00219 | 0  | 141 | 0.00000 | 0.00281 |
| Non-Melanoma Skin | RET    | MUT    | 0  | 132  | 0.00000 | 0.00175 | 0  | 141 | 0.00000 | 0.00213 |
| Non-Melanoma Skin | RIT1   | MUT    | 0  | 132  | 0.00000 | 0.00105 | 0  | 141 | 0.00000 | 0.00126 |
| Non-Melanoma Skin | ROS1   | FUSION | 0  | 132  | 0.00000 | 0.00149 | 0  | 141 | 0.00000 | 0.00358 |
| Non-Melanoma Skin | ROS1   | MUT    | 0  | 132  | 0.00000 | 0.00009 | 0  | 141 | 0.00000 | 0.00019 |
| Non-Melanoma Skin | SF3B1  | MUT    | 0  | 132  | 0.00000 | 0.00807 | 0  | 141 | 0.00000 | 0.00803 |
| Non-Melanoma Skin | SMO    | MUT    | 0  | 132  | 0.00000 | 0.00013 | 0  | 141 | 0.00000 | 0.00039 |
| Non-Melanoma Skin | SPOP   | MUT    | 0  | 132  | 0.00000 | 0.00355 | 1  | 141 | 0.00709 | 0.00793 |
| Non-Melanoma Skin | TERT   | FUSION | 0  | 132  | 0.00000 | 0.00009 | 0  | 141 | 0.00000 | 0.00000 |
| Non-Melanoma Skin | TERT   | MUT    | 47 | 132  | 0.35606 | 0.09795 | 44 | 141 | 0.31206 | 0.12307 |
| Non-Melanoma Skin | TP53   | HOMDEL | 1  | 132  | 0.00758 | 0.01276 | 1  | 141 | 0.00709 | 0.00900 |
| Non-Melanoma Skin | TP53   | MUT    | 90 | 132  | 0.68182 | 0.52404 | 73 | 141 | 0.51773 | 0.41428 |
| Ovary             | AKT1   | MUT    | 7  | 1484 | 0.00472 | 0.01026 | 2  | 215 | 0.00930 | 0.01045 |
| Ovary             | ALK    | AMP    | 1  | 1484 | 0.00067 | 0.00018 | 0  | 215 | 0.00000 | 0.00039 |
| Ovary             | ALK    | FUSION | 1  | 1484 | 0.00067 | 0.00570 | 0  | 215 | 0.00000 | 0.00474 |
| Ovary             | ALK    | MUT    | 0  | 1484 | 0.00000 | 0.00061 | 0  | 215 | 0.00000 | 0.00184 |
| Ovary             | AR     | AMP    | 0  | 1484 | 0.00000 | 0.00601 | 0  | 215 | 0.00000 | 0.00842 |
| Ovary             | AR     | MUT    | 0  | 1484 | 0.00000 | 0.00136 | 0  | 215 | 0.00000 | 0.00213 |
| Ovary             | ARAF   | MUT    | 0  | 1484 | 0.00000 | 0.00039 | 0  | 215 | 0.00000 | 0.00068 |
| Ovary             | BRAF   | AMP    | 11 | 1484 | 0.00741 | 0.00250 | 0  | 215 | 0.00000 | 0.00164 |
| Ovary             | BRAF   | FUSION | 1  | 1484 | 0.00067 | 0.00118 | 0  | 215 | 0.00000 | 0.00368 |
| Ovary             | BRAF   | MUT    | 21 | 1484 | 0.01415 | 0.04106 | 3  | 215 | 0.01395 | 0.04247 |
| Ovary             | CCND1  | AMP    | 13 | 1484 | 0.00876 | 0.04299 | 1  | 215 | 0.00465 | 0.04189 |
| Ovary             | CDK4   | AMP    | 4  | 1484 | 0.00270 | 0.01921 | 2  | 215 | 0.00930 | 0.02632 |
| Ovary             | CDK4   | MUT    | 0  | 1484 | 0.00000 | 0.00061 | 0  | 215 | 0.00000 | 0.00116 |
| Ovary             | CDK6   | AMP    | 0  | 1484 | 0.00000 | 0.00697 | 0  | 215 | 0.00000 | 0.00590 |
| Ovary             | CDKN2A | HOMDEL | 50 | 1484 | 0.03369 | 0.12234 | 7  | 215 | 0.03256 | 0.07498 |
| Ovary             | CDKN2A | MUT    | 13 | 1484 | 0.00876 | 0.04917 | 4  | 215 | 0.01860 | 0.03599 |
| Ovary             | CTNNB1 | MUT    | 37 | 1484 | 0.02493 | 0.02601 | 4  | 215 | 0.01860 | 0.02254 |
| Ovary             | EGFR   | AMP    | 2  | 1484 | 0.00135 | 0.02996 | 0  | 215 | 0.00000 | 0.03154 |
| Ovary             | EGFR   | MUT    | 0  | 1484 | 0.00000 | 0.02649 | 0  | 215 | 0.00000 | 0.04112 |
| Ovary             | ERBB2  | AMP    | 27 | 1484 | 0.01819 | 0.03202 | 9  | 215 | 0.04186 | 0.03938 |
| Ovary             | ERBB2  | MUT    | 9  | 1484 | 0.00606 | 0.01689 | 3  | 215 | 0.01395 | 0.01945 |
| Ovary             | ERBB3  | MUT    | 2  | 1484 | 0.00135 | 0.00561 | 0  | 215 | 0.00000 | 0.00987 |
| Ovary             | ERBB4  | MUT    | 0  | 1484 | 0.00000 | 0.00022 | 0  | 215 | 0.00000 | 0.00155 |
| Ovary             | ESR1   | MUT    | 3  | 1484 | 0.00202 | 0.00965 | 1  | 215 | 0.00465 | 0.01006 |
| Ovary             | EZH2   | MUT    | 0  | 1484 | 0.00000 | 0.00140 | 0  | 215 | 0.00000 | 0.00281 |
| Ovary             | FGFR1  | AMP    | 37 | 1484 | 0.02493 | 0.02816 | 3  | 215 | 0.01395 | 0.02554 |
| Ovary             | FGFR1  | FUSION | 0  | 1484 | 0.00000 | 0.00013 | 0  | 215 | 0.00000 | 0.00039 |
| Ovary             | FGFR2  | AMP    | 7  | 1484 | 0.00472 | 0.00347 | 2  | 215 | 0.00930 | 0.00358 |
| Ovary             | FGFR2  | FUSION | 0  | 1484 | 0.00000 | 0.00083 | 0  | 215 | 0.00000 | 0.00300 |
| Ovary             | FGFR2  | MUT    | 11 | 1484 | 0.00741 | 0.00531 | 1  | 215 | 0.00465 | 0.00435 |
| Ovary             | FGFR3  | AMP    | 6  | 1484 | 0.00404 | 0.00263 | 2  | 215 | 0.00930 | 0.00387 |
| Ovary             | FGFR3  | FUSION | 0  | 1484 | 0.00000 | 0.00294 | 0  | 215 | 0.00000 | 0.00271 |

|          |        |        |      |      |         |         |     |     |         |         |
|----------|--------|--------|------|------|---------|---------|-----|-----|---------|---------|
| Ovary    | FGFR3  | MUT    | 0    | 1484 | 0.00000 | 0.00588 | 0   | 215 | 0.00000 | 0.01200 |
| Ovary    | FGFR4  | AMP    | 2    | 1484 | 0.00135 | 0.00075 | 1   | 215 | 0.00465 | 0.00252 |
| Ovary    | GNA11  | MUT    | 0    | 1484 | 0.00000 | 0.00105 | 0   | 215 | 0.00000 | 0.00184 |
| Ovary    | GNAQ   | MUT    | 0    | 1484 | 0.00000 | 0.00096 | 0   | 215 | 0.00000 | 0.00281 |
| Ovary    | HRAS   | MUT    | 2    | 1484 | 0.00135 | 0.00504 | 0   | 215 | 0.00000 | 0.00658 |
| Ovary    | IDH1   | MUT    | 0    | 1484 | 0.00000 | 0.01776 | 0   | 215 | 0.00000 | 0.02351 |
| Ovary    | IDH2   | MUT    | 2    | 1484 | 0.00135 | 0.00281 | 0   | 215 | 0.00000 | 0.00290 |
| Ovary    | JAK1   | MUT    | 0    | 1484 | 0.00000 | 0.00026 | 0   | 215 | 0.00000 | 0.00755 |
| Ovary    | JAK2   | MUT    | 0    | 1484 | 0.00000 | 0.00066 | 0   | 215 | 0.00000 | 0.00019 |
| Ovary    | KIT    | AMP    | 5    | 1484 | 0.00337 | 0.00675 | 0   | 215 | 0.00000 | 0.00832 |
| Ovary    | KIT    | MUT    | 1    | 1484 | 0.00067 | 0.00675 | 0   | 215 | 0.00000 | 0.01335 |
| Ovary    | KRAS   | AMP    | 53   | 1484 | 0.03571 | 0.01614 | 12  | 215 | 0.05581 | 0.01809 |
| Ovary    | KRAS   | MUT    | 127  | 1484 | 0.08558 | 0.17580 | 19  | 215 | 0.08837 | 0.15257 |
| Ovary    | MAP2K1 | MUT    | 2    | 1484 | 0.00135 | 0.00412 | 0   | 215 | 0.00000 | 0.00629 |
| Ovary    | MAP2K2 | MUT    | 0    | 1484 | 0.00000 | 0.00022 | 0   | 215 | 0.00000 | 0.00058 |
| Ovary    | MAP2K4 | MUT    | 0    | 1484 | 0.00000 | 0.00092 | 1   | 215 | 0.00465 | 0.00687 |
| Ovary    | MAPK1  | MUT    | 0    | 1484 | 0.00000 | 0.00079 | 0   | 215 | 0.00000 | 0.00116 |
| Ovary    | MDM2   | AMP    | 25   | 1484 | 0.01685 | 0.02772 | 2   | 215 | 0.00930 | 0.03696 |
| Ovary    | MET    | AMP    | 3    | 1484 | 0.00202 | 0.00693 | 2   | 215 | 0.00930 | 0.00948 |
| Ovary    | MET    | MUT    | 0    | 1484 | 0.00000 | 0.00355 | 0   | 215 | 0.00000 | 0.00300 |
| Ovary    | MTOR   | MUT    | 0    | 1484 | 0.00000 | 0.00390 | 0   | 215 | 0.00000 | 0.00619 |
| Ovary    | MYC    | AMP    | 82   | 1484 | 0.05526 | 0.04066 | 14  | 215 | 0.06512 | 0.03957 |
| Ovary    | MYCN   | AMP    | 5    | 1484 | 0.00337 | 0.00325 | 0   | 215 | 0.00000 | 0.00484 |
| Ovary    | MYD88  | MUT    | 1    | 1484 | 0.00067 | 0.00118 | 0   | 215 | 0.00000 | 0.00145 |
| Ovary    | NOTCH1 | FUSION | 0    | 1484 | 0.00000 | 0.00018 | 1   | 215 | 0.00465 | 0.00048 |
| Ovary    | NRAS   | MUT    | 15   | 1484 | 0.01011 | 0.02048 | 4   | 215 | 0.01860 | 0.02070 |
| Ovary    | NRG1   | FUSION | 0    | 1484 | 0.00000 | 0.00039 | 0   | 215 | 0.00000 | 0.00039 |
| Ovary    | NTRK1  | FUSION | 0    | 1484 | 0.00000 | 0.00026 | 0   | 215 | 0.00000 | 0.00097 |
| Ovary    | NTRK3  | FUSION | 0    | 1484 | 0.00000 | 0.00066 | 0   | 215 | 0.00000 | 0.00097 |
| Ovary    | PDGFRA | AMP    | 3    | 1484 | 0.00202 | 0.00627 | 0   | 215 | 0.00000 | 0.00851 |
| Ovary    | PDGFRA | MUT    | 0    | 1484 | 0.00000 | 0.00048 | 0   | 215 | 0.00000 | 0.00223 |
| Ovary    | PIK3CA | AMP    | 79   | 1484 | 0.05323 | 0.02298 | 6   | 215 | 0.02791 | 0.00697 |
| Ovary    | PIK3CA | MUT    | 120  | 1484 | 0.08086 | 0.12387 | 22  | 215 | 0.10233 | 0.11474 |
| Ovary    | POLE   | MUT    | 1    | 1484 | 0.00067 | 0.00079 | 0   | 215 | 0.00000 | 0.00252 |
| Ovary    | PRKACA | FUSION | 0    | 1484 | 0.00000 | 0.00039 | 0   | 215 | 0.00000 | 0.00087 |
| Ovary    | PTEN   | HOMDEL | 21   | 1484 | 0.01415 | 0.03228 | 5   | 215 | 0.02326 | 0.02390 |
| Ovary    | PTEN   | MUT    | 52   | 1484 | 0.03504 | 0.06536 | 10  | 215 | 0.04651 | 0.05563 |
| Ovary    | RAF1   | MUT    | 1    | 1484 | 0.00067 | 0.00154 | 0   | 215 | 0.00000 | 0.00261 |
| Ovary    | RB1    | HOMDEL | 36   | 1484 | 0.02426 | 0.02298 | 6   | 215 | 0.02791 | 0.01896 |
| Ovary    | RB1    | MUT    | 23   | 1484 | 0.01550 | 0.04053 | 6   | 215 | 0.02791 | 0.04092 |
| Ovary    | RET    | FUSION | 0    | 1484 | 0.00000 | 0.00219 | 0   | 215 | 0.00000 | 0.00281 |
| Ovary    | RET    | MUT    | 3    | 1484 | 0.00202 | 0.00175 | 0   | 215 | 0.00000 | 0.00213 |
| Ovary    | RIT1   | MUT    | 2    | 1484 | 0.00135 | 0.00105 | 0   | 215 | 0.00000 | 0.00126 |
| Ovary    | ROS1   | FUSION | 2    | 1484 | 0.00135 | 0.00149 | 1   | 215 | 0.00465 | 0.00358 |
| Ovary    | ROS1   | MUT    | 0    | 1484 | 0.00000 | 0.00009 | 1   | 215 | 0.00465 | 0.00019 |
| Ovary    | SF3B1  | MUT    | 0    | 1484 | 0.00000 | 0.00807 | 0   | 215 | 0.00000 | 0.00803 |
| Ovary    | SMO    | MUT    | 0    | 1484 | 0.00000 | 0.00013 | 0   | 215 | 0.00000 | 0.00039 |
| Ovary    | SPOP   | MUT    | 0    | 1484 | 0.00000 | 0.00355 | 2   | 215 | 0.00930 | 0.00793 |
| Ovary    | TERT   | FUSION | 0    | 1484 | 0.00000 | 0.00009 | 0   | 215 | 0.00000 | 0.00000 |
| Ovary    | TERT   | MUT    | 27   | 1484 | 0.01819 | 0.09795 | 7   | 215 | 0.03256 | 0.12307 |
| Ovary    | TP53   | HOMDEL | 8    | 1484 | 0.00539 | 0.01276 | 0   | 215 | 0.00000 | 0.00900 |
| Ovary    | TP53   | MUT    | 1147 | 1484 | 0.77291 | 0.52404 | 153 | 215 | 0.71163 | 0.41428 |
| Pancreas | AKT1   | MUT    | 2    | 1080 | 0.00185 | 0.01026 | 1   | 419 | 0.00239 | 0.01045 |
| Pancreas | ALK    | AMP    | 0    | 1080 | 0.00000 | 0.00018 | 0   | 419 | 0.00000 | 0.00039 |
| Pancreas | ALK    | FUSION | 0    | 1080 | 0.00000 | 0.00570 | 1   | 419 | 0.00239 | 0.00474 |
| Pancreas | ALK    | MUT    | 0    | 1080 | 0.00000 | 0.00061 | 0   | 419 | 0.00000 | 0.00184 |
| Pancreas | AR     | AMP    | 0    | 1080 | 0.00000 | 0.00601 | 0   | 419 | 0.00000 | 0.00842 |
| Pancreas | AR     | MUT    | 0    | 1080 | 0.00000 | 0.00136 | 0   | 419 | 0.00000 | 0.00213 |
| Pancreas | ARAF   | MUT    | 0    | 1080 | 0.00000 | 0.00039 | 0   | 419 | 0.00000 | 0.00068 |
| Pancreas | BRAF   | AMP    | 0    | 1080 | 0.00000 | 0.00250 | 0   | 419 | 0.00000 | 0.00164 |
| Pancreas | BRAF   | FUSION | 6    | 1080 | 0.00556 | 0.00118 | 7   | 419 | 0.01671 | 0.00368 |
| Pancreas | BRAF   | MUT    | 12   | 1080 | 0.01111 | 0.04106 | 5   | 419 | 0.01193 | 0.04247 |
| Pancreas | CCND1  | AMP    | 15   | 1080 | 0.01389 | 0.04299 | 4   | 419 | 0.00955 | 0.04189 |
| Pancreas | CDK4   | AMP    | 16   | 1080 | 0.01481 | 0.01921 | 3   | 419 | 0.00716 | 0.02632 |
| Pancreas | CDK4   | MUT    | 1    | 1080 | 0.00093 | 0.00061 | 0   | 419 | 0.00000 | 0.00116 |
| Pancreas | CDK6   | AMP    | 21   | 1080 | 0.01944 | 0.00697 | 4   | 419 | 0.00955 | 0.00590 |
| Pancreas | CDKN2A | HOMDEL | 297  | 1080 | 0.27500 | 0.12234 | 33  | 419 | 0.07876 | 0.07498 |
| Pancreas | CDKN2A | MUT    | 193  | 1080 | 0.17870 | 0.04917 | 54  | 419 | 0.12888 | 0.03599 |
| Pancreas | CTNNB1 | MUT    | 17   | 1080 | 0.01574 | 0.02601 | 11  | 419 | 0.02625 | 0.02254 |
| Pancreas | EGFR   | AMP    | 2    | 1080 | 0.00185 | 0.02996 | 0   | 419 | 0.00000 | 0.03154 |
| Pancreas | EGFR   | MUT    | 0    | 1080 | 0.00000 | 0.02649 | 0   | 419 | 0.00000 | 0.04112 |
| Pancreas | ERBB2  | AMP    | 19   | 1080 | 0.01759 | 0.03202 | 6   | 419 | 0.01432 | 0.03938 |
| Pancreas | ERBB2  | MUT    | 5    | 1080 | 0.00463 | 0.01689 | 3   | 419 | 0.00716 | 0.01945 |
| Pancreas | ERBB3  | MUT    | 4    | 1080 | 0.00370 | 0.00561 | 1   | 419 | 0.00239 | 0.00987 |
| Pancreas | ERBB4  | MUT    | 0    | 1080 | 0.00000 | 0.00022 | 0   | 419 | 0.00000 | 0.00155 |
| Pancreas | ESR1   | MUT    | 0    | 1080 | 0.00000 | 0.00965 | 0   | 419 | 0.00000 | 0.01006 |



|          |        |        |     |      |         |         |     |     |         |         |
|----------|--------|--------|-----|------|---------|---------|-----|-----|---------|---------|
| Pancreas | EZH2   | MUT    | 0   | 1080 | 0.00000 | 0.00140 | 0   | 419 | 0.00000 | 0.00281 |
| Pancreas | FGFR1  | AMP    | 16  | 1080 | 0.01481 | 0.02816 | 8   | 419 | 0.01909 | 0.02554 |
| Pancreas | FGFR1  | FUSION | 0   | 1080 | 0.00000 | 0.00013 | 0   | 419 | 0.00000 | 0.00039 |
| Pancreas | FGFR2  | AMP    | 1   | 1080 | 0.00093 | 0.00347 | 0   | 419 | 0.00000 | 0.00358 |
| Pancreas | FGFR2  | FUSION | 1   | 1080 | 0.00093 | 0.00083 | 2   | 419 | 0.00477 | 0.00300 |
| Pancreas | FGFR2  | MUT    | 0   | 1080 | 0.00000 | 0.00531 | 0   | 419 | 0.00000 | 0.00435 |
| Pancreas | FGFR3  | AMP    | 5   | 1080 | 0.00463 | 0.00263 | 1   | 419 | 0.00239 | 0.00387 |
| Pancreas | FGFR3  | FUSION | 0   | 1080 | 0.00000 | 0.00294 | 0   | 419 | 0.00000 | 0.00271 |
| Pancreas | FGFR3  | MUT    | 0   | 1080 | 0.00000 | 0.00588 | 0   | 419 | 0.00000 | 0.01200 |
| Pancreas | FGFR4  | AMP    | 1   | 1080 | 0.00093 | 0.00075 | 2   | 419 | 0.00477 | 0.00252 |
| Pancreas | GNA11  | MUT    | 0   | 1080 | 0.00000 | 0.00105 | 0   | 419 | 0.00000 | 0.00184 |
| Pancreas | GNAQ   | MUT    | 0   | 1080 | 0.00000 | 0.00096 | 0   | 419 | 0.00000 | 0.00281 |
| Pancreas | HRAS   | MUT    | 1   | 1080 | 0.00093 | 0.00504 | 0   | 419 | 0.00000 | 0.00658 |
| Pancreas | IDH1   | MUT    | 2   | 1080 | 0.00185 | 0.01776 | 2   | 419 | 0.00477 | 0.02351 |
| Pancreas | IDH2   | MUT    | 3   | 1080 | 0.00278 | 0.00281 | 1   | 419 | 0.00239 | 0.00290 |
| Pancreas | JAK1   | MUT    | 0   | 1080 | 0.00000 | 0.00026 | 0   | 419 | 0.00000 | 0.00755 |
| Pancreas | JAK2   | MUT    | 0   | 1080 | 0.00000 | 0.00066 | 0   | 419 | 0.00000 | 0.00019 |
| Pancreas | KIT    | AMP    | 1   | 1080 | 0.00093 | 0.00675 | 0   | 419 | 0.00000 | 0.00832 |
| Pancreas | KIT    | MUT    | 0   | 1080 | 0.00000 | 0.00675 | 0   | 419 | 0.00000 | 0.01335 |
| Pancreas | KRAS   | AMP    | 28  | 1080 | 0.02593 | 0.01614 | 8   | 419 | 0.01909 | 0.01809 |
| Pancreas | KRAS   | MUT    | 923 | 1080 | 0.85463 | 0.17580 | 363 | 419 | 0.86635 | 0.15257 |
| Pancreas | MAP2K1 | MUT    | 5   | 1080 | 0.00463 | 0.00412 | 0   | 419 | 0.00000 | 0.00629 |
| Pancreas | MAP2K2 | MUT    | 0   | 1080 | 0.00000 | 0.00022 | 2   | 419 | 0.00477 | 0.00058 |
| Pancreas | MAP2K4 | MUT    | 0   | 1080 | 0.00000 | 0.00092 | 2   | 419 | 0.00477 | 0.00687 |
| Pancreas | MAPK1  | MUT    | 0   | 1080 | 0.00000 | 0.00079 | 0   | 419 | 0.00000 | 0.00116 |
| Pancreas | MDM2   | AMP    | 22  | 1080 | 0.02037 | 0.02772 | 5   | 419 | 0.01193 | 0.03696 |
| Pancreas | MET    | AMP    | 1   | 1080 | 0.00093 | 0.00693 | 0   | 419 | 0.00000 | 0.00948 |
| Pancreas | MET    | MUT    | 0   | 1080 | 0.00000 | 0.00355 | 0   | 419 | 0.00000 | 0.00300 |
| Pancreas | MTOR   | MUT    | 1   | 1080 | 0.00093 | 0.00390 | 0   | 419 | 0.00000 | 0.00619 |
| Pancreas | MYC    | AMP    | 46  | 1080 | 0.04259 | 0.04066 | 12  | 419 | 0.02864 | 0.03957 |
| Pancreas | MYCN   | AMP    | 0   | 1080 | 0.00000 | 0.00325 | 0   | 419 | 0.00000 | 0.00484 |
| Pancreas | MYD88  | MUT    | 0   | 1080 | 0.00000 | 0.00118 | 0   | 419 | 0.00000 | 0.00145 |
| Pancreas | NOTCH1 | FUSION | 0   | 1080 | 0.00000 | 0.00018 | 1   | 419 | 0.00239 | 0.00048 |
| Pancreas | NRAS   | MUT    | 4   | 1080 | 0.00370 | 0.02048 | 1   | 419 | 0.00239 | 0.02070 |
| Pancreas | NRG1   | FUSION | 0   | 1080 | 0.00000 | 0.00039 | 0   | 419 | 0.00000 | 0.00039 |
| Pancreas | NTRK1  | FUSION | 0   | 1080 | 0.00000 | 0.00026 | 0   | 419 | 0.00000 | 0.00097 |
| Pancreas | NTRK3  | FUSION | 1   | 1080 | 0.00093 | 0.00066 | 2   | 419 | 0.00477 | 0.00097 |
| Pancreas | PDGFRA | AMP    | 0   | 1080 | 0.00000 | 0.00627 | 0   | 419 | 0.00000 | 0.00851 |
| Pancreas | PDGFRA | MUT    | 0   | 1080 | 0.00000 | 0.00048 | 0   | 419 | 0.00000 | 0.00223 |
| Pancreas | PIK3CA | AMP    | 7   | 1080 | 0.00648 | 0.02298 | 0   | 419 | 0.00000 | 0.00697 |
| Pancreas | PIK3CA | MUT    | 21  | 1080 | 0.01944 | 0.12387 | 12  | 419 | 0.02864 | 0.11474 |
| Pancreas | POLE   | MUT    | 0   | 1080 | 0.00000 | 0.00079 | 0   | 419 | 0.00000 | 0.00252 |
| Pancreas | PRKACA | FUSION | 1   | 1080 | 0.00093 | 0.00039 | 0   | 419 | 0.00000 | 0.00087 |
| Pancreas | PTEN   | HOMDEL | 8   | 1080 | 0.00741 | 0.03228 | 0   | 419 | 0.00000 | 0.02390 |
| Pancreas | PTEN   | MUT    | 7   | 1080 | 0.00648 | 0.06536 | 4   | 419 | 0.00955 | 0.05563 |
| Pancreas | RAF1   | MUT    | 0   | 1080 | 0.00000 | 0.00154 | 0   | 419 | 0.00000 | 0.00261 |
| Pancreas | RB1    | HOMDEL | 5   | 1080 | 0.00463 | 0.02298 | 2   | 419 | 0.00477 | 0.01896 |
| Pancreas | RB1    | MUT    | 19  | 1080 | 0.01759 | 0.04053 | 12  | 419 | 0.02864 | 0.04092 |
| Pancreas | RET    | FUSION | 1   | 1080 | 0.00093 | 0.00219 | 0   | 419 | 0.00000 | 0.00281 |
| Pancreas | RET    | MUT    | 0   | 1080 | 0.00000 | 0.00175 | 0   | 419 | 0.00000 | 0.00213 |
| Pancreas | RIT1   | MUT    | 0   | 1080 | 0.00000 | 0.00105 | 0   | 419 | 0.00000 | 0.00126 |
| Pancreas | ROS1   | FUSION | 0   | 1080 | 0.00000 | 0.00149 | 1   | 419 | 0.00239 | 0.00358 |
| Pancreas | ROS1   | MUT    | 0   | 1080 | 0.00000 | 0.00009 | 0   | 419 | 0.00000 | 0.00019 |
| Pancreas | SF3B1  | MUT    | 18  | 1080 | 0.01667 | 0.00807 | 4   | 419 | 0.00955 | 0.00803 |
| Pancreas | SMO    | MUT    | 0   | 1080 | 0.00000 | 0.00013 | 0   | 419 | 0.00000 | 0.00039 |
| Pancreas | SPOP   | MUT    | 0   | 1080 | 0.00000 | 0.00355 | 1   | 419 | 0.00239 | 0.00793 |
| Pancreas | TERT   | FUSION | 0   | 1080 | 0.00000 | 0.00009 | 0   | 419 | 0.00000 | 0.00000 |
| Pancreas | TERT   | MUT    | 7   | 1080 | 0.00648 | 0.09795 | 3   | 419 | 0.00716 | 0.12307 |
| Pancreas | TP53   | HOMDEL | 6   | 1080 | 0.00556 | 0.01276 | 0   | 419 | 0.00000 | 0.00900 |
| Pancreas | TP53   | MUT    | 771 | 1080 | 0.71389 | 0.52404 | 276 | 419 | 0.65871 | 0.41428 |
| Prostate | AKT1   | MUT    | 22  | 1283 | 0.01715 | 0.01026 | 6   | 621 | 0.00966 | 0.01045 |
| Prostate | ALK    | AMP    | 0   | 1283 | 0.00000 | 0.00018 | 0   | 621 | 0.00000 | 0.00039 |
| Prostate | ALK    | FUSION | 1   | 1283 | 0.00078 | 0.00570 | 0   | 621 | 0.00000 | 0.00474 |
| Prostate | ALK    | MUT    | 0   | 1283 | 0.00000 | 0.00061 | 1   | 621 | 0.00161 | 0.00184 |
| Prostate | AR     | AMP    | 117 | 1283 | 0.09119 | 0.00601 | 79  | 621 | 0.12721 | 0.00842 |
| Prostate | AR     | MUT    | 26  | 1283 | 0.02027 | 0.00136 | 21  | 621 | 0.03382 | 0.00213 |
| Prostate | ARAF   | MUT    | 0   | 1283 | 0.00000 | 0.00039 | 0   | 621 | 0.00000 | 0.00068 |
| Prostate | BRAF   | AMP    | 8   | 1283 | 0.00624 | 0.00250 | 0   | 621 | 0.00000 | 0.00164 |
| Prostate | BRAF   | FUSION | 7   | 1283 | 0.00546 | 0.00118 | 5   | 621 | 0.00805 | 0.00368 |
| Prostate | BRAF   | MUT    | 12  | 1283 | 0.00935 | 0.04106 | 8   | 621 | 0.01288 | 0.04247 |
| Prostate | CCND1  | AMP    | 25  | 1283 | 0.01949 | 0.04299 | 13  | 621 | 0.02093 | 0.04189 |
| Prostate | CDK4   | AMP    | 6   | 1283 | 0.00468 | 0.01921 | 5   | 621 | 0.00805 | 0.02632 |
| Prostate | CDK4   | MUT    | 0   | 1283 | 0.00000 | 0.00061 | 0   | 621 | 0.00000 | 0.00116 |
| Prostate | CDK6   | AMP    | 2   | 1283 | 0.00156 | 0.00697 | 2   | 621 | 0.00322 | 0.00590 |
| Prostate | CDKN2A | HOMDEL | 33  | 1283 | 0.02572 | 0.12234 | 8   | 621 | 0.01288 | 0.07498 |
| Prostate | CDKN2A | MUT    | 8   | 1283 | 0.00624 | 0.04917 | 0   | 621 | 0.00000 | 0.03599 |

|          |        |        |     |      |         |         |     |     |         |         |
|----------|--------|--------|-----|------|---------|---------|-----|-----|---------|---------|
| Prostate | CTNNB1 | MUT    | 65  | 1283 | 0.05066 | 0.02601 | 22  | 621 | 0.03543 | 0.02254 |
| Prostate | EGFR   | AMP    | 0   | 1283 | 0.00000 | 0.02996 | 3   | 621 | 0.00483 | 0.03154 |
| Prostate | EGFR   | MUT    | 0   | 1283 | 0.00000 | 0.02649 | 1   | 621 | 0.00161 | 0.04112 |
| Prostate | ERBB2  | AMP    | 1   | 1283 | 0.00078 | 0.03202 | 0   | 621 | 0.00000 | 0.03938 |
| Prostate | ERBB2  | MUT    | 1   | 1283 | 0.00078 | 0.01689 | 2   | 621 | 0.00322 | 0.01945 |
| Prostate | ERBB3  | MUT    | 1   | 1283 | 0.00078 | 0.00561 | 1   | 621 | 0.00161 | 0.00987 |
| Prostate | ERBB4  | MUT    | 0   | 1283 | 0.00000 | 0.00022 | 0   | 621 | 0.00000 | 0.00155 |
| Prostate | ERG    | FUSION | 509 | 1283 | 0.39673 | 0.02246 | 307 | 621 | 0.49436 | 0.03028 |
| Prostate | ESR1   | MUT    | 0   | 1283 | 0.00000 | 0.00965 | 0   | 621 | 0.00000 | 0.01006 |
| Prostate | ETV1   | FUSION | 5   | 1283 | 0.00390 | 0.00022 | 8   | 621 | 0.01288 | 0.00077 |
| Prostate | ETV4   | FUSION | 5   | 1283 | 0.00390 | 0.00022 | 1   | 621 | 0.00161 | 0.00010 |
| Prostate | ETV5   | FUSION | 3   | 1283 | 0.00234 | 0.00013 | 1   | 621 | 0.00161 | 0.00010 |
| Prostate | EZH2   | MUT    | 1   | 1283 | 0.00078 | 0.00140 | 0   | 621 | 0.00000 | 0.00281 |
| Prostate | FGFR1  | AMP    | 13  | 1283 | 0.01013 | 0.02816 | 8   | 621 | 0.01288 | 0.02554 |
| Prostate | FGFR1  | FUSION | 0   | 1283 | 0.00000 | 0.00013 | 1   | 621 | 0.00161 | 0.00039 |
| Prostate | FGFR2  | AMP    | 1   | 1283 | 0.00078 | 0.00347 | 0   | 621 | 0.00000 | 0.00358 |
| Prostate | FGFR2  | FUSION | 1   | 1283 | 0.00078 | 0.00083 | 0   | 621 | 0.00000 | 0.00300 |
| Prostate | FGFR2  | MUT    | 0   | 1283 | 0.00000 | 0.00531 | 0   | 621 | 0.00000 | 0.00435 |
| Prostate | FGFR3  | AMP    | 1   | 1283 | 0.00078 | 0.00263 | 2   | 621 | 0.00322 | 0.00387 |
| Prostate | FGFR3  | FUSION | 3   | 1283 | 0.00234 | 0.00294 | 1   | 621 | 0.00161 | 0.00271 |
| Prostate | FGFR3  | MUT    | 0   | 1283 | 0.00000 | 0.00588 | 0   | 621 | 0.00000 | 0.01200 |
| Prostate | FGFR4  | AMP    | 1   | 1283 | 0.00078 | 0.00075 | 0   | 621 | 0.00000 | 0.00252 |
| Prostate | GNA11  | MUT    | 0   | 1283 | 0.00000 | 0.00105 | 0   | 621 | 0.00000 | 0.00184 |
| Prostate | GNAQ   | MUT    | 0   | 1283 | 0.00000 | 0.00096 | 0   | 621 | 0.00000 | 0.00281 |
| Prostate | HRAS   | MUT    | 12  | 1283 | 0.00935 | 0.00504 | 5   | 621 | 0.00805 | 0.00658 |
| Prostate | IDH1   | MUT    | 3   | 1283 | 0.00234 | 0.01776 | 3   | 621 | 0.00483 | 0.02351 |
| Prostate | IDH2   | MUT    | 1   | 1283 | 0.00078 | 0.00281 | 0   | 621 | 0.00000 | 0.00290 |
| Prostate | JAK1   | MUT    | 0   | 1283 | 0.00000 | 0.00026 | 9   | 621 | 0.01449 | 0.00755 |
| Prostate | JAK2   | MUT    | 1   | 1283 | 0.00078 | 0.00066 | 0   | 621 | 0.00000 | 0.00019 |
| Prostate | KIT    | AMP    | 2   | 1283 | 0.00156 | 0.00675 | 0   | 621 | 0.00000 | 0.00832 |
| Prostate | KIT    | MUT    | 0   | 1283 | 0.00000 | 0.00675 | 0   | 621 | 0.00000 | 0.01335 |
| Prostate | KRAS   | AMP    | 2   | 1283 | 0.00156 | 0.01614 | 2   | 621 | 0.00322 | 0.01809 |
| Prostate | KRAS   | MUT    | 4   | 1283 | 0.00312 | 0.17580 | 5   | 621 | 0.00805 | 0.15257 |
| Prostate | MAP2K1 | MUT    | 0   | 1283 | 0.00000 | 0.00412 | 1   | 621 | 0.00161 | 0.00629 |
| Prostate | MAP2K2 | MUT    | 0   | 1283 | 0.00000 | 0.00022 | 0   | 621 | 0.00000 | 0.00058 |
| Prostate | MAP2K4 | MUT    | 0   | 1283 | 0.00000 | 0.00092 | 1   | 621 | 0.00161 | 0.00687 |
| Prostate | MAPK1  | MUT    | 2   | 1283 | 0.00156 | 0.00079 | 0   | 621 | 0.00000 | 0.00116 |
| Prostate | MDM2   | AMP    | 2   | 1283 | 0.00156 | 0.02772 | 5   | 621 | 0.00805 | 0.03696 |
| Prostate | MET    | AMP    | 0   | 1283 | 0.00000 | 0.00693 | 1   | 621 | 0.00161 | 0.00948 |
| Prostate | MET    | MUT    | 0   | 1283 | 0.00000 | 0.00355 | 0   | 621 | 0.00000 | 0.00300 |
| Prostate | MTOR   | MUT    | 3   | 1283 | 0.00234 | 0.00390 | 1   | 621 | 0.00161 | 0.00619 |
| Prostate | MYC    | AMP    | 42  | 1283 | 0.03274 | 0.04066 | 30  | 621 | 0.04831 | 0.03957 |
| Prostate | MYCN   | AMP    | 1   | 1283 | 0.00078 | 0.00325 | 0   | 621 | 0.00000 | 0.00484 |
| Prostate | MYD88  | MUT    | 1   | 1283 | 0.00078 | 0.00118 | 0   | 621 | 0.00000 | 0.00145 |
| Prostate | NOTCH1 | FUSION | 0   | 1283 | 0.00000 | 0.00018 | 0   | 621 | 0.00000 | 0.00048 |
| Prostate | NRAS   | MUT    | 1   | 1283 | 0.00078 | 0.02048 | 0   | 621 | 0.00000 | 0.02070 |
| Prostate | NRG1   | FUSION | 0   | 1283 | 0.00000 | 0.00039 | 0   | 621 | 0.00000 | 0.00039 |
| Prostate | NTRK1  | FUSION | 0   | 1283 | 0.00000 | 0.00026 | 0   | 621 | 0.00000 | 0.00097 |
| Prostate | NTRK3  | FUSION | 0   | 1283 | 0.00000 | 0.00066 | 0   | 621 | 0.00000 | 0.00097 |
| Prostate | PDGFRA | AMP    | 2   | 1283 | 0.00156 | 0.00627 | 0   | 621 | 0.00000 | 0.00851 |
| Prostate | PDGFRA | MUT    | 0   | 1283 | 0.00000 | 0.00048 | 0   | 621 | 0.00000 | 0.00223 |
| Prostate | PIK3CA | AMP    | 12  | 1283 | 0.00935 | 0.02298 | 0   | 621 | 0.00000 | 0.00697 |
| Prostate | PIK3CA | MUT    | 50  | 1283 | 0.03897 | 0.12387 | 19  | 621 | 0.03060 | 0.11474 |
| Prostate | POLE   | MUT    | 1   | 1283 | 0.00078 | 0.00079 | 1   | 621 | 0.00161 | 0.00252 |
| Prostate | PRKACA | FUSION | 0   | 1283 | 0.00000 | 0.00039 | 0   | 621 | 0.00000 | 0.00087 |
| Prostate | PTEN   | HOMDEL | 239 | 1283 | 0.18628 | 0.03228 | 72  | 621 | 0.11594 | 0.02390 |
| Prostate | PTEN   | MUT    | 91  | 1283 | 0.07093 | 0.06536 | 38  | 621 | 0.06119 | 0.05563 |
| Prostate | RAF1   | MUT    | 0   | 1283 | 0.00000 | 0.00154 | 0   | 621 | 0.00000 | 0.00261 |
| Prostate | RB1    | HOMDEL | 67  | 1283 | 0.05222 | 0.02298 | 28  | 621 | 0.04509 | 0.01896 |
| Prostate | RB1    | MUT    | 35  | 1283 | 0.02728 | 0.04053 | 19  | 621 | 0.03060 | 0.04092 |
| Prostate | RET    | FUSION | 0   | 1283 | 0.00000 | 0.00219 | 1   | 621 | 0.00161 | 0.00281 |
| Prostate | RET    | MUT    | 1   | 1283 | 0.00078 | 0.00175 | 0   | 621 | 0.00000 | 0.00213 |
| Prostate | RIT1   | MUT    | 0   | 1283 | 0.00000 | 0.00105 | 0   | 621 | 0.00000 | 0.00126 |
| Prostate | ROS1   | FUSION | 0   | 1283 | 0.00000 | 0.00149 | 0   | 621 | 0.00000 | 0.00358 |
| Prostate | ROS1   | MUT    | 0   | 1283 | 0.00000 | 0.00009 | 0   | 621 | 0.00000 | 0.00019 |
| Prostate | SF3B1  | MUT    | 12  | 1283 | 0.00935 | 0.00807 | 0   | 621 | 0.00000 | 0.00803 |
| Prostate | SMO    | MUT    | 0   | 1283 | 0.00000 | 0.00013 | 0   | 621 | 0.00000 | 0.00039 |
| Prostate | SPOP   | MUT    | 75  | 1283 | 0.05846 | 0.00355 | 62  | 621 | 0.09984 | 0.00793 |
| Prostate | TERT   | FUSION | 0   | 1283 | 0.00000 | 0.00009 | 0   | 621 | 0.00000 | 0.00000 |
| Prostate | TERT   | MUT    | 1   | 1283 | 0.00078 | 0.09795 | 2   | 621 | 0.00322 | 0.12307 |
| Prostate | TP53   | HOMDEL | 47  | 1283 | 0.03663 | 0.01276 | 11  | 621 | 0.01771 | 0.00900 |
| Prostate | TP53   | MUT    | 446 | 1283 | 0.34762 | 0.52404 | 184 | 621 | 0.29630 | 0.41428 |
| Sarcoma  | AKT1   | MUT    | 0   | 764  | 0.00000 | 0.01026 | 2   | 673 | 0.00297 | 0.01045 |
| Sarcoma  | ALK    | AMP    | 1   | 764  | 0.00131 | 0.00018 | 1   | 673 | 0.00149 | 0.00039 |
| Sarcoma  | ALK    | FUSION | 0   | 764  | 0.00000 | 0.00570 | 1   | 673 | 0.00149 | 0.00474 |
| Sarcoma  | ALK    | MUT    | 1   | 764  | 0.00131 | 0.00061 | 1   | 673 | 0.00149 | 0.00184 |

|         |        |        |     |     |         |         |    |     |         |         |
|---------|--------|--------|-----|-----|---------|---------|----|-----|---------|---------|
| Sarcoma | AR     | AMP    | 0   | 764 | 0.00000 | 0.00601 | 2  | 673 | 0.00297 | 0.00842 |
| Sarcoma | AR     | MUT    | 0   | 764 | 0.00000 | 0.00136 | 0  | 673 | 0.00000 | 0.00213 |
| Sarcoma | ARAF   | MUT    | 0   | 764 | 0.00000 | 0.00039 | 1  | 673 | 0.00149 | 0.00068 |
| Sarcoma | BRAF   | AMP    | 1   | 764 | 0.00131 | 0.00250 | 0  | 673 | 0.00000 | 0.00164 |
| Sarcoma | BRAF   | FUSION | 1   | 764 | 0.00131 | 0.00118 | 2  | 673 | 0.00297 | 0.00368 |
| Sarcoma | BRAF   | MUT    | 3   | 764 | 0.00393 | 0.04106 | 2  | 673 | 0.00297 | 0.04247 |
| Sarcoma | CCND1  | AMP    | 1   | 764 | 0.00131 | 0.04299 | 6  | 673 | 0.00892 | 0.04189 |
| Sarcoma | CDK4   | AMP    | 82  | 764 | 0.10733 | 0.01921 | 83 | 673 | 0.12333 | 0.02632 |
| Sarcoma | CDK4   | MUT    | 0   | 764 | 0.00000 | 0.00061 | 0  | 673 | 0.00000 | 0.00116 |
| Sarcoma | CDK6   | AMP    | 0   | 764 | 0.00000 | 0.00697 | 3  | 673 | 0.00446 | 0.00590 |
| Sarcoma | CDKN2A | HOMDEL | 115 | 764 | 0.15052 | 0.12234 | 65 | 673 | 0.09658 | 0.07498 |
| Sarcoma | CDKN2A | MUT    | 11  | 764 | 0.01440 | 0.04917 | 10 | 673 | 0.01486 | 0.03599 |
| Sarcoma | CTNNB1 | MUT    | 12  | 764 | 0.01571 | 0.02601 | 4  | 673 | 0.00594 | 0.02254 |
| Sarcoma | EGFR   | AMP    | 1   | 764 | 0.00131 | 0.02996 | 6  | 673 | 0.00892 | 0.03154 |
| Sarcoma | EGFR   | MUT    | 0   | 764 | 0.00000 | 0.02649 | 0  | 673 | 0.00000 | 0.04112 |
| Sarcoma | ERBB2  | AMP    | 0   | 764 | 0.00000 | 0.03202 | 0  | 673 | 0.00000 | 0.03938 |
| Sarcoma | ERBB2  | MUT    | 0   | 764 | 0.00000 | 0.01689 | 0  | 673 | 0.00000 | 0.01945 |
| Sarcoma | ERBB3  | MUT    | 0   | 764 | 0.00000 | 0.00561 | 0  | 673 | 0.00000 | 0.00987 |
| Sarcoma | ERBB4  | MUT    | 0   | 764 | 0.00000 | 0.00022 | 2  | 673 | 0.00297 | 0.00155 |
| Sarcoma | ESR1   | MUT    | 1   | 764 | 0.00131 | 0.00965 | 0  | 673 | 0.00000 | 0.01006 |
| Sarcoma | EZH2   | MUT    | 1   | 764 | 0.00131 | 0.00140 | 2  | 673 | 0.00297 | 0.00281 |
| Sarcoma | FGFR1  | AMP    | 5   | 764 | 0.00654 | 0.02816 | 10 | 673 | 0.01486 | 0.02554 |
| Sarcoma | FGFR1  | FUSION | 0   | 764 | 0.00000 | 0.00013 | 0  | 673 | 0.00000 | 0.00039 |
| Sarcoma | FGFR2  | AMP    | 0   | 764 | 0.00000 | 0.00347 | 0  | 673 | 0.00000 | 0.00358 |
| Sarcoma | FGFR2  | FUSION | 0   | 764 | 0.00000 | 0.00083 | 1  | 673 | 0.00149 | 0.00300 |
| Sarcoma | FGFR2  | MUT    | 0   | 764 | 0.00000 | 0.00531 | 0  | 673 | 0.00000 | 0.00435 |
| Sarcoma | FGFR3  | AMP    | 0   | 764 | 0.00000 | 0.00263 | 1  | 673 | 0.00149 | 0.00387 |
| Sarcoma | FGFR3  | FUSION | 0   | 764 | 0.00000 | 0.00294 | 0  | 673 | 0.00000 | 0.00271 |
| Sarcoma | FGFR3  | MUT    | 0   | 764 | 0.00000 | 0.00588 | 0  | 673 | 0.00000 | 0.01200 |
| Sarcoma | FGFR4  | AMP    | 1   | 764 | 0.00131 | 0.00075 | 4  | 673 | 0.00594 | 0.00252 |
| Sarcoma | GNA11  | MUT    | 0   | 764 | 0.00000 | 0.00105 | 0  | 673 | 0.00000 | 0.00184 |
| Sarcoma | GNAQ   | MUT    | 0   | 764 | 0.00000 | 0.00096 | 0  | 673 | 0.00000 | 0.00281 |
| Sarcoma | HRAS   | MUT    | 6   | 764 | 0.00785 | 0.00504 | 5  | 673 | 0.00743 | 0.00658 |
| Sarcoma | IDH1   | MUT    | 8   | 764 | 0.01047 | 0.01776 | 7  | 673 | 0.01040 | 0.02351 |
| Sarcoma | IDH2   | MUT    | 6   | 764 | 0.00785 | 0.00281 | 1  | 673 | 0.00149 | 0.00290 |
| Sarcoma | JAK1   | MUT    | 0   | 764 | 0.00000 | 0.00026 | 2  | 673 | 0.00297 | 0.00755 |
| Sarcoma | JAK2   | MUT    | 0   | 764 | 0.00000 | 0.00066 | 0  | 673 | 0.00000 | 0.00019 |
| Sarcoma | KIT    | AMP    | 10  | 764 | 0.01309 | 0.00675 | 13 | 673 | 0.01932 | 0.00832 |
| Sarcoma | KIT    | MUT    | 51  | 764 | 0.06675 | 0.00675 | 1  | 673 | 0.00149 | 0.01335 |
| Sarcoma | KRAS   | AMP    | 4   | 764 | 0.00524 | 0.01614 | 6  | 673 | 0.00892 | 0.01809 |
| Sarcoma | KRAS   | MUT    | 7   | 764 | 0.00916 | 0.17580 | 7  | 673 | 0.01040 | 0.15257 |
| Sarcoma | MAP2K1 | MUT    | 1   | 764 | 0.00131 | 0.00412 | 1  | 673 | 0.00149 | 0.00629 |
| Sarcoma | MAP2K2 | MUT    | 0   | 764 | 0.00000 | 0.00022 | 0  | 673 | 0.00000 | 0.00058 |
| Sarcoma | MAP2K4 | MUT    | 0   | 764 | 0.00000 | 0.00092 | 0  | 673 | 0.00000 | 0.00687 |
| Sarcoma | MAPK1  | MUT    | 0   | 764 | 0.00000 | 0.00079 | 0  | 673 | 0.00000 | 0.00116 |
| Sarcoma | MDM2   | AMP    | 97  | 764 | 0.12696 | 0.02772 | 96 | 673 | 0.14264 | 0.03696 |
| Sarcoma | MET    | AMP    | 1   | 764 | 0.00131 | 0.00693 | 6  | 673 | 0.00892 | 0.00948 |
| Sarcoma | MET    | MUT    | 0   | 764 | 0.00000 | 0.00355 | 0  | 673 | 0.00000 | 0.00300 |
| Sarcoma | MTOR   | MUT    | 4   | 764 | 0.00524 | 0.00390 | 0  | 673 | 0.00000 | 0.00619 |
| Sarcoma | MYC    | AMP    | 21  | 764 | 0.02749 | 0.04066 | 14 | 673 | 0.02080 | 0.03957 |
| Sarcoma | MYCN   | AMP    | 0   | 764 | 0.00000 | 0.00325 | 1  | 673 | 0.00149 | 0.00484 |
| Sarcoma | MYD88  | MUT    | 0   | 764 | 0.00000 | 0.00118 | 0  | 673 | 0.00000 | 0.00145 |
| Sarcoma | NOTCH1 | FUSION | 0   | 764 | 0.00000 | 0.00018 | 0  | 673 | 0.00000 | 0.00048 |
| Sarcoma | NRAS   | MUT    | 11  | 764 | 0.01440 | 0.02048 | 7  | 673 | 0.01040 | 0.02070 |
| Sarcoma | NRG1   | FUSION | 0   | 764 | 0.00000 | 0.00039 | 0  | 673 | 0.00000 | 0.00039 |
| Sarcoma | NTRK1  | FUSION | 0   | 764 | 0.00000 | 0.00026 | 1  | 673 | 0.00149 | 0.00097 |
| Sarcoma | NTRK3  | FUSION | 0   | 764 | 0.00000 | 0.00066 | 0  | 673 | 0.00000 | 0.00097 |
| Sarcoma | PDGFRA | AMP    | 10  | 764 | 0.01309 | 0.00627 | 17 | 673 | 0.02526 | 0.00851 |
| Sarcoma | PDGFRA | MUT    | 1   | 764 | 0.00131 | 0.00048 | 0  | 673 | 0.00000 | 0.00223 |
| Sarcoma | PIK3CA | AMP    | 3   | 764 | 0.00393 | 0.02298 | 0  | 673 | 0.00000 | 0.00697 |
| Sarcoma | PIK3CA | MUT    | 23  | 764 | 0.03010 | 0.12387 | 22 | 673 | 0.03269 | 0.11474 |
| Sarcoma | POLE   | MUT    | 0   | 764 | 0.00000 | 0.00079 | 0  | 673 | 0.00000 | 0.00252 |
| Sarcoma | PRKACA | FUSION | 0   | 764 | 0.00000 | 0.00039 | 0  | 673 | 0.00000 | 0.00087 |
| Sarcoma | PTEN   | HOMDEL | 33  | 764 | 0.04319 | 0.03228 | 25 | 673 | 0.03715 | 0.02390 |
| Sarcoma | PTEN   | MUT    | 21  | 764 | 0.02749 | 0.06536 | 14 | 673 | 0.02080 | 0.05563 |
| Sarcoma | RAF1   | MUT    | 0   | 764 | 0.00000 | 0.00154 | 0  | 673 | 0.00000 | 0.00261 |
| Sarcoma | RB1    | HOMDEL | 105 | 764 | 0.13743 | 0.02298 | 55 | 673 | 0.08172 | 0.01896 |
| Sarcoma | RB1    | MUT    | 50  | 764 | 0.06545 | 0.04053 | 32 | 673 | 0.04755 | 0.04092 |
| Sarcoma | RET    | FUSION | 0   | 764 | 0.00000 | 0.00219 | 0  | 673 | 0.00000 | 0.00281 |
| Sarcoma | RET    | MUT    | 0   | 764 | 0.00000 | 0.00175 | 0  | 673 | 0.00000 | 0.00213 |
| Sarcoma | RIT1   | MUT    | 0   | 764 | 0.00000 | 0.00105 | 0  | 673 | 0.00000 | 0.00126 |
| Sarcoma | ROS1   | FUSION | 1   | 764 | 0.00131 | 0.00149 | 2  | 673 | 0.00297 | 0.00358 |
| Sarcoma | ROS1   | MUT    | 0   | 764 | 0.00000 | 0.00009 | 0  | 673 | 0.00000 | 0.00019 |
| Sarcoma | SF3B1  | MUT    | 2   | 764 | 0.00262 | 0.00807 | 1  | 673 | 0.00149 | 0.00803 |
| Sarcoma | SMO    | MUT    | 0   | 764 | 0.00000 | 0.00013 | 0  | 673 | 0.00000 | 0.00039 |
| Sarcoma | SPOP   | MUT    | 0   | 764 | 0.00000 | 0.00355 | 0  | 673 | 0.00000 | 0.00793 |

|         |        |        |     |     |         |         |     |     |         |         |
|---------|--------|--------|-----|-----|---------|---------|-----|-----|---------|---------|
| Sarcoma | TERT   | FUSION | 1   | 764 | 0.00131 | 0.00009 | 0   | 673 | 0.00000 | 0.00000 |
| Sarcoma | TERT   | MUT    | 36  | 764 | 0.04712 | 0.09795 | 67  | 673 | 0.09955 | 0.12307 |
| Sarcoma | TP53   | HOMDEL | 57  | 764 | 0.07461 | 0.01276 | 37  | 673 | 0.05498 | 0.00900 |
| Sarcoma | TP53   | MUT    | 238 | 764 | 0.31152 | 0.52404 | 146 | 673 | 0.21694 | 0.41428 |
| Thyroid | AKT1   | MUT    | 2   | 249 | 0.00803 | 0.01026 | 1   | 221 | 0.00452 | 0.01045 |
| Thyroid | ALK    | AMP    | 0   | 249 | 0.00000 | 0.00018 | 1   | 221 | 0.00452 | 0.00039 |
| Thyroid | ALK    | FUSION | 0   | 249 | 0.00000 | 0.00570 | 0   | 221 | 0.00000 | 0.00474 |
| Thyroid | ALK    | MUT    | 0   | 249 | 0.00000 | 0.00061 | 0   | 221 | 0.00000 | 0.00184 |
| Thyroid | AR     | AMP    | 0   | 249 | 0.00000 | 0.00601 | 0   | 221 | 0.00000 | 0.00842 |
| Thyroid | AR     | MUT    | 0   | 249 | 0.00000 | 0.00136 | 0   | 221 | 0.00000 | 0.00213 |
| Thyroid | ARAF   | MUT    | 0   | 249 | 0.00000 | 0.00039 | 0   | 221 | 0.00000 | 0.00068 |
| Thyroid | BRAF   | AMP    | 1   | 249 | 0.00402 | 0.00250 | 0   | 221 | 0.00000 | 0.00164 |
| Thyroid | BRAF   | FUSION | 1   | 249 | 0.00402 | 0.00118 | 3   | 221 | 0.01357 | 0.00368 |
| Thyroid | BRAF   | MUT    | 101 | 249 | 0.40562 | 0.04106 | 83  | 221 | 0.37557 | 0.04247 |
| Thyroid | CCND1  | AMP    | 0   | 249 | 0.00000 | 0.04299 | 0   | 221 | 0.00000 | 0.04189 |
| Thyroid | CDK4   | AMP    | 1   | 249 | 0.00402 | 0.01921 | 1   | 221 | 0.00452 | 0.02632 |
| Thyroid | CDK4   | MUT    | 0   | 249 | 0.00000 | 0.00061 | 0   | 221 | 0.00000 | 0.00116 |
| Thyroid | CDK6   | AMP    | 0   | 249 | 0.00000 | 0.00697 | 0   | 221 | 0.00000 | 0.00590 |
| Thyroid | CDKN2A | HOMDEL | 11  | 249 | 0.04418 | 0.12234 | 11  | 221 | 0.04977 | 0.07498 |
| Thyroid | CDKN2A | MUT    | 7   | 249 | 0.02811 | 0.04917 | 3   | 221 | 0.01357 | 0.03599 |
| Thyroid | CTNNB1 | MUT    | 0   | 249 | 0.00000 | 0.02601 | 1   | 221 | 0.00452 | 0.02254 |
| Thyroid | EGFR   | AMP    | 0   | 249 | 0.00000 | 0.02996 | 0   | 221 | 0.00000 | 0.03154 |
| Thyroid | EGFR   | MUT    | 0   | 249 | 0.00000 | 0.02649 | 0   | 221 | 0.00000 | 0.04112 |
| Thyroid | ERBB2  | AMP    | 0   | 249 | 0.00000 | 0.03202 | 0   | 221 | 0.00000 | 0.03938 |
| Thyroid | ERBB2  | MUT    | 0   | 249 | 0.00000 | 0.01689 | 0   | 221 | 0.00000 | 0.01945 |
| Thyroid | ERBB3  | MUT    | 0   | 249 | 0.00000 | 0.00561 | 0   | 221 | 0.00000 | 0.00987 |
| Thyroid | ERBB4  | MUT    | 0   | 249 | 0.00000 | 0.00022 | 0   | 221 | 0.00000 | 0.00155 |
| Thyroid | ESR1   | MUT    | 0   | 249 | 0.00000 | 0.00965 | 0   | 221 | 0.00000 | 0.01006 |
| Thyroid | EZH2   | MUT    | 0   | 249 | 0.00000 | 0.00140 | 1   | 221 | 0.00452 | 0.00281 |
| Thyroid | FGFR1  | AMP    | 0   | 249 | 0.00000 | 0.02816 | 1   | 221 | 0.00452 | 0.02554 |
| Thyroid | FGFR1  | FUSION | 0   | 249 | 0.00000 | 0.00013 | 0   | 221 | 0.00000 | 0.00039 |
| Thyroid | FGFR2  | AMP    | 0   | 249 | 0.00000 | 0.00347 | 0   | 221 | 0.00000 | 0.00358 |
| Thyroid | FGFR2  | FUSION | 0   | 249 | 0.00000 | 0.00083 | 0   | 221 | 0.00000 | 0.00300 |
| Thyroid | FGFR2  | MUT    | 0   | 249 | 0.00000 | 0.00531 | 0   | 221 | 0.00000 | 0.00435 |
| Thyroid | FGFR3  | AMP    | 1   | 249 | 0.00402 | 0.00263 | 0   | 221 | 0.00000 | 0.00387 |
| Thyroid | FGFR3  | FUSION | 0   | 249 | 0.00000 | 0.00294 | 0   | 221 | 0.00000 | 0.00271 |
| Thyroid | FGFR3  | MUT    | 0   | 249 | 0.00000 | 0.00588 | 0   | 221 | 0.00000 | 0.01200 |
| Thyroid | FGFR4  | AMP    | 0   | 249 | 0.00000 | 0.00075 | 0   | 221 | 0.00000 | 0.00252 |
| Thyroid | GNA11  | MUT    | 0   | 249 | 0.00000 | 0.00105 | 0   | 221 | 0.00000 | 0.00184 |
| Thyroid | GNAQ   | MUT    | 0   | 249 | 0.00000 | 0.00096 | 0   | 221 | 0.00000 | 0.00281 |
| Thyroid | HRAS   | MUT    | 7   | 249 | 0.02811 | 0.00504 | 8   | 221 | 0.03620 | 0.00658 |
| Thyroid | IDH1   | MUT    | 0   | 249 | 0.00000 | 0.01776 | 1   | 221 | 0.00452 | 0.02351 |
| Thyroid | IDH2   | MUT    | 0   | 249 | 0.00000 | 0.00281 | 0   | 221 | 0.00000 | 0.00290 |
| Thyroid | JAK1   | MUT    | 0   | 249 | 0.00000 | 0.00026 | 0   | 221 | 0.00000 | 0.00755 |
| Thyroid | JAK2   | MUT    | 0   | 249 | 0.00000 | 0.00066 | 0   | 221 | 0.00000 | 0.00019 |
| Thyroid | KIT    | AMP    | 3   | 249 | 0.01205 | 0.00675 | 1   | 221 | 0.00452 | 0.00832 |
| Thyroid | KIT    | MUT    | 0   | 249 | 0.00000 | 0.00675 | 0   | 221 | 0.00000 | 0.01335 |
| Thyroid | KRAS   | AMP    | 0   | 249 | 0.00000 | 0.01614 | 0   | 221 | 0.00000 | 0.01809 |
| Thyroid | KRAS   | MUT    | 4   | 249 | 0.01606 | 0.17580 | 7   | 221 | 0.03167 | 0.15257 |
| Thyroid | MAP2K1 | MUT    | 1   | 249 | 0.00402 | 0.00412 | 0   | 221 | 0.00000 | 0.00629 |
| Thyroid | MAP2K2 | MUT    | 0   | 249 | 0.00000 | 0.00022 | 0   | 221 | 0.00000 | 0.00058 |
| Thyroid | MAP2K4 | MUT    | 0   | 249 | 0.00000 | 0.00092 | 3   | 221 | 0.01357 | 0.00687 |
| Thyroid | MAPK1  | MUT    | 0   | 249 | 0.00000 | 0.00079 | 0   | 221 | 0.00000 | 0.00116 |
| Thyroid | MDM2   | AMP    | 0   | 249 | 0.00000 | 0.02772 | 0   | 221 | 0.00000 | 0.03696 |
| Thyroid | MET    | AMP    | 1   | 249 | 0.00402 | 0.00693 | 0   | 221 | 0.00000 | 0.00948 |
| Thyroid | MET    | MUT    | 0   | 249 | 0.00000 | 0.00355 | 0   | 221 | 0.00000 | 0.00300 |
| Thyroid | MTOR   | MUT    | 0   | 249 | 0.00000 | 0.00390 | 1   | 221 | 0.00452 | 0.00619 |
| Thyroid | MYC    | AMP    | 0   | 249 | 0.00000 | 0.04066 | 0   | 221 | 0.00000 | 0.03957 |
| Thyroid | MYCN   | AMP    | 0   | 249 | 0.00000 | 0.00325 | 0   | 221 | 0.00000 | 0.00484 |
| Thyroid | MYD88  | MUT    | 0   | 249 | 0.00000 | 0.00118 | 0   | 221 | 0.00000 | 0.00145 |
| Thyroid | NOTCH1 | FUSION | 0   | 249 | 0.00000 | 0.00018 | 0   | 221 | 0.00000 | 0.00048 |
| Thyroid | NRAS   | MUT    | 28  | 249 | 0.11245 | 0.02048 | 36  | 221 | 0.16290 | 0.02070 |
| Thyroid | NRG1   | FUSION | 0   | 249 | 0.00000 | 0.00039 | 0   | 221 | 0.00000 | 0.00039 |
| Thyroid | NTRK1  | FUSION | 0   | 249 | 0.00000 | 0.00026 | 0   | 221 | 0.00000 | 0.00097 |
| Thyroid | NTRK3  | FUSION | 3   | 249 | 0.01205 | 0.00066 | 0   | 221 | 0.00000 | 0.00097 |
| Thyroid | PDGFRA | AMP    | 3   | 249 | 0.01205 | 0.00627 | 1   | 221 | 0.00452 | 0.00851 |
| Thyroid | PDGFRA | MUT    | 0   | 249 | 0.00000 | 0.00048 | 0   | 221 | 0.00000 | 0.00223 |
| Thyroid | PIK3CA | AMP    | 1   | 249 | 0.00402 | 0.02298 | 0   | 221 | 0.00000 | 0.00697 |
| Thyroid | PIK3CA | MUT    | 17  | 249 | 0.06827 | 0.12387 | 13  | 221 | 0.05882 | 0.11474 |
| Thyroid | POLE   | MUT    | 0   | 249 | 0.00000 | 0.00079 | 0   | 221 | 0.00000 | 0.00252 |
| Thyroid | PRKACA | FUSION | 0   | 249 | 0.00000 | 0.00039 | 0   | 221 | 0.00000 | 0.00087 |
| Thyroid | PTEN   | HOMDEL | 0   | 249 | 0.00000 | 0.03228 | 1   | 221 | 0.00452 | 0.02390 |
| Thyroid | PTEN   | MUT    | 10  | 249 | 0.04016 | 0.06536 | 19  | 221 | 0.08597 | 0.05563 |
| Thyroid | RAF1   | MUT    | 0   | 249 | 0.00000 | 0.00154 | 0   | 221 | 0.00000 | 0.00261 |
| Thyroid | RB1    | HOMDEL | 1   | 249 | 0.00402 | 0.02298 | 0   | 221 | 0.00000 | 0.01896 |
| Thyroid | RB1    | MUT    | 4   | 249 | 0.01606 | 0.04053 | 7   | 221 | 0.03167 | 0.04092 |

|                 |        |        |     |      |         |         |     |     |         |         |
|-----------------|--------|--------|-----|------|---------|---------|-----|-----|---------|---------|
| Thyroid         | RET    | FUSION | 12  | 249  | 0.04819 | 0.00219 | 8   | 221 | 0.03620 | 0.00281 |
| Thyroid         | RET    | MUT    | 26  | 249  | 0.10442 | 0.00175 | 12  | 221 | 0.05430 | 0.00213 |
| Thyroid         | RIT1   | MUT    | 0   | 249  | 0.00000 | 0.00105 | 0   | 221 | 0.00000 | 0.00126 |
| Thyroid         | ROS1   | FUSION | 0   | 249  | 0.00000 | 0.00149 | 0   | 221 | 0.00000 | 0.00358 |
| Thyroid         | ROS1   | MUT    | 0   | 249  | 0.00000 | 0.00009 | 0   | 221 | 0.00000 | 0.00019 |
| Thyroid         | SF3B1  | MUT    | 1   | 249  | 0.00402 | 0.00807 | 0   | 221 | 0.00000 | 0.00803 |
| Thyroid         | SMO    | MUT    | 0   | 249  | 0.00000 | 0.00013 | 0   | 221 | 0.00000 | 0.00039 |
| Thyroid         | SPOP   | MUT    | 0   | 249  | 0.00000 | 0.00355 | 0   | 221 | 0.00000 | 0.00793 |
| Thyroid         | TERT   | FUSION | 0   | 249  | 0.00000 | 0.00009 | 0   | 221 | 0.00000 | 0.00000 |
| Thyroid         | TERT   | MUT    | 125 | 249  | 0.50201 | 0.09795 | 135 | 221 | 0.61086 | 0.12307 |
| Thyroid         | TP53   | HOMDEL | 0   | 249  | 0.00000 | 0.01276 | 5   | 221 | 0.02262 | 0.00900 |
| Thyroid         | TP53   | MUT    | 33  | 249  | 0.13253 | 0.52404 | 37  | 221 | 0.16742 | 0.41428 |
| Unknown Primary | AKT1   | MUT    | 5   | 1042 | 0.00480 | 0.01026 | 4   | 172 | 0.02326 | 0.01045 |
| Unknown Primary | ALK    | AMP    | 0   | 1042 | 0.00000 | 0.00018 | 0   | 172 | 0.00000 | 0.00039 |
| Unknown Primary | ALK    | FUSION | 3   | 1042 | 0.00288 | 0.00570 | 0   | 172 | 0.00000 | 0.00474 |
| Unknown Primary | ALK    | MUT    | 0   | 1042 | 0.00000 | 0.00061 | 0   | 172 | 0.00000 | 0.00184 |
| Unknown Primary | AR     | AMP    | 5   | 1042 | 0.00480 | 0.00601 | 0   | 172 | 0.00000 | 0.00842 |
| Unknown Primary | AR     | MUT    | 0   | 1042 | 0.00000 | 0.00136 | 0   | 172 | 0.00000 | 0.00213 |
| Unknown Primary | ARAF   | MUT    | 1   | 1042 | 0.00096 | 0.00039 | 0   | 172 | 0.00000 | 0.00068 |
| Unknown Primary | BRAF   | AMP    | 1   | 1042 | 0.00096 | 0.00250 | 1   | 172 | 0.00581 | 0.00164 |
| Unknown Primary | BRAF   | FUSION | 0   | 1042 | 0.00000 | 0.00118 | 1   | 172 | 0.00581 | 0.00368 |
| Unknown Primary | BRAF   | MUT    | 41  | 1042 | 0.03935 | 0.04106 | 10  | 172 | 0.05814 | 0.04247 |
| Unknown Primary | CCND1  | AMP    | 35  | 1042 | 0.03359 | 0.04299 | 4   | 172 | 0.02326 | 0.04189 |
| Unknown Primary | CDK4   | AMP    | 7   | 1042 | 0.00672 | 0.01921 | 3   | 172 | 0.01744 | 0.02632 |
| Unknown Primary | CDK4   | MUT    | 0   | 1042 | 0.00000 | 0.00061 | 0   | 172 | 0.00000 | 0.00116 |
| Unknown Primary | CDK6   | AMP    | 12  | 1042 | 0.01152 | 0.00697 | 0   | 172 | 0.00000 | 0.00590 |
| Unknown Primary | CDKN2A | HOMDEL | 212 | 1042 | 0.20345 | 0.12234 | 16  | 172 | 0.09302 | 0.07498 |
| Unknown Primary | CDKN2A | MUT    | 101 | 1042 | 0.09693 | 0.04917 | 11  | 172 | 0.06395 | 0.03599 |
| Unknown Primary | CTNNA1 | MUT    | 36  | 1042 | 0.03455 | 0.02601 | 7   | 172 | 0.04070 | 0.02254 |
| Unknown Primary | EGFR   | AMP    | 11  | 1042 | 0.01056 | 0.02996 | 5   | 172 | 0.02907 | 0.03154 |
| Unknown Primary | EGFR   | MUT    | 5   | 1042 | 0.00480 | 0.02649 | 1   | 172 | 0.00581 | 0.04112 |
| Unknown Primary | ERBB2  | AMP    | 26  | 1042 | 0.02495 | 0.03202 | 8   | 172 | 0.04651 | 0.03938 |
| Unknown Primary | ERBB2  | MUT    | 18  | 1042 | 0.01727 | 0.01689 | 5   | 172 | 0.02907 | 0.01945 |
| Unknown Primary | ERBB3  | MUT    | 5   | 1042 | 0.00480 | 0.00561 | 2   | 172 | 0.01163 | 0.00987 |
| Unknown Primary | ERBB4  | MUT    | 0   | 1042 | 0.00000 | 0.00022 | 0   | 172 | 0.00000 | 0.00155 |
| Unknown Primary | ESR1   | MUT    | 1   | 1042 | 0.00096 | 0.00965 | 1   | 172 | 0.00581 | 0.01006 |
| Unknown Primary | EZH2   | MUT    | 2   | 1042 | 0.00192 | 0.00140 | 0   | 172 | 0.00000 | 0.00281 |
| Unknown Primary | FGFR1  | AMP    | 22  | 1042 | 0.02111 | 0.02816 | 0   | 172 | 0.00000 | 0.02554 |
| Unknown Primary | FGFR1  | FUSION | 0   | 1042 | 0.00000 | 0.00013 | 0   | 172 | 0.00000 | 0.00039 |
| Unknown Primary | FGFR2  | AMP    | 4   | 1042 | 0.00384 | 0.00347 | 0   | 172 | 0.00000 | 0.00358 |
| Unknown Primary | FGFR2  | FUSION | 4   | 1042 | 0.00384 | 0.00083 | 2   | 172 | 0.01163 | 0.00300 |
| Unknown Primary | FGFR2  | MUT    | 3   | 1042 | 0.00288 | 0.00531 | 1   | 172 | 0.00581 | 0.00435 |
| Unknown Primary | FGFR3  | AMP    | 4   | 1042 | 0.00384 | 0.00263 | 0   | 172 | 0.00000 | 0.00387 |
| Unknown Primary | FGFR3  | FUSION | 2   | 1042 | 0.00192 | 0.00294 | 0   | 172 | 0.00000 | 0.00271 |
| Unknown Primary | FGFR3  | MUT    | 5   | 1042 | 0.00480 | 0.00588 | 0   | 172 | 0.00000 | 0.01200 |
| Unknown Primary | FGFR4  | AMP    | 0   | 1042 | 0.00000 | 0.00075 | 0   | 172 | 0.00000 | 0.00252 |
| Unknown Primary | GNA11  | MUT    | 0   | 1042 | 0.00000 | 0.00105 | 0   | 172 | 0.00000 | 0.00184 |
| Unknown Primary | GNAQ   | MUT    | 0   | 1042 | 0.00000 | 0.00096 | 0   | 172 | 0.00000 | 0.00281 |
| Unknown Primary | HRAS   | MUT    | 9   | 1042 | 0.00864 | 0.00504 | 0   | 172 | 0.00000 | 0.00658 |
| Unknown Primary | IDH1   | MUT    | 22  | 1042 | 0.02111 | 0.01776 | 0   | 172 | 0.00000 | 0.02351 |
| Unknown Primary | IDH2   | MUT    | 5   | 1042 | 0.00480 | 0.00281 | 1   | 172 | 0.00581 | 0.00290 |
| Unknown Primary | JAK1   | MUT    | 1   | 1042 | 0.00096 | 0.00026 | 0   | 172 | 0.00000 | 0.00755 |
| Unknown Primary | JAK2   | MUT    | 1   | 1042 | 0.00096 | 0.00066 | 0   | 172 | 0.00000 | 0.00019 |
| Unknown Primary | KIT    | AMP    | 4   | 1042 | 0.00384 | 0.00675 | 0   | 172 | 0.00000 | 0.00832 |
| Unknown Primary | KIT    | MUT    | 4   | 1042 | 0.00384 | 0.00675 | 0   | 172 | 0.00000 | 0.01335 |
| Unknown Primary | KRAS   | AMP    | 25  | 1042 | 0.02399 | 0.01614 | 2   | 172 | 0.01163 | 0.01809 |
| Unknown Primary | KRAS   | MUT    | 214 | 1042 | 0.20537 | 0.17580 | 37  | 172 | 0.21512 | 0.15257 |
| Unknown Primary | MAP2K1 | MUT    | 12  | 1042 | 0.01152 | 0.00412 | 1   | 172 | 0.00581 | 0.00629 |
| Unknown Primary | MAP2K2 | MUT    | 0   | 1042 | 0.00000 | 0.00022 | 1   | 172 | 0.00581 | 0.00058 |
| Unknown Primary | MAP2K4 | MUT    | 2   | 1042 | 0.00192 | 0.00092 | 1   | 172 | 0.00581 | 0.00687 |
| Unknown Primary | MAPK1  | MUT    | 1   | 1042 | 0.00096 | 0.00079 | 0   | 172 | 0.00000 | 0.00116 |
| Unknown Primary | MDM2   | AMP    | 20  | 1042 | 0.01919 | 0.02772 | 2   | 172 | 0.01163 | 0.03696 |
| Unknown Primary | MET    | AMP    | 17  | 1042 | 0.01631 | 0.00693 | 1   | 172 | 0.00581 | 0.00948 |
| Unknown Primary | MET    | MUT    | 2   | 1042 | 0.00192 | 0.00355 | 0   | 172 | 0.00000 | 0.00300 |
| Unknown Primary | MTOR   | MUT    | 0   | 1042 | 0.00000 | 0.00390 | 0   | 172 | 0.00000 | 0.00619 |
| Unknown Primary | MYC    | AMP    | 45  | 1042 | 0.04319 | 0.04066 | 6   | 172 | 0.03488 | 0.03957 |
| Unknown Primary | MYCN   | AMP    | 5   | 1042 | 0.00480 | 0.00325 | 0   | 172 | 0.00000 | 0.00484 |
| Unknown Primary | MYD88  | MUT    | 1   | 1042 | 0.00096 | 0.00118 | 0   | 172 | 0.00000 | 0.00145 |
| Unknown Primary | NOTCH1 | FUSION | 0   | 1042 | 0.00000 | 0.00018 | 0   | 172 | 0.00000 | 0.00048 |
| Unknown Primary | NRAS   | MUT    | 25  | 1042 | 0.02399 | 0.02048 | 5   | 172 | 0.02907 | 0.02070 |
| Unknown Primary | NRG1   | FUSION | 1   | 1042 | 0.00096 | 0.00039 | 1   | 172 | 0.00581 | 0.00039 |
| Unknown Primary | NTRK1  | FUSION | 0   | 1042 | 0.00000 | 0.00026 | 1   | 172 | 0.00581 | 0.00097 |
| Unknown Primary | NTRK3  | FUSION | 1   | 1042 | 0.00096 | 0.00066 | 0   | 172 | 0.00000 | 0.00097 |
| Unknown Primary | PDGFRA | AMP    | 4   | 1042 | 0.00384 | 0.00627 | 0   | 172 | 0.00000 | 0.00851 |
| Unknown Primary | PDGFRA | MUT    | 0   | 1042 | 0.00000 | 0.00048 | 0   | 172 | 0.00000 | 0.00223 |
| Unknown Primary | PIK3CA | AMP    | 19  | 1042 | 0.01823 | 0.02298 | 0   | 172 | 0.00000 | 0.00697 |

|                 |        |        |     |      |         |         |    |     |         |         |
|-----------------|--------|--------|-----|------|---------|---------|----|-----|---------|---------|
| Unknown Primary | PIK3CA | MUT    | 92  | 1042 | 0.08829 | 0.12387 | 16 | 172 | 0.09302 | 0.11474 |
| Unknown Primary | POLE   | MUT    | 0   | 1042 | 0.00000 | 0.00079 | 1  | 172 | 0.00581 | 0.00252 |
| Unknown Primary | PRKACA | FUSION | 1   | 1042 | 0.00096 | 0.00039 | 0  | 172 | 0.00000 | 0.00087 |
| Unknown Primary | PTEN   | HOMDEL | 25  | 1042 | 0.02399 | 0.03228 | 4  | 172 | 0.02326 | 0.02390 |
| Unknown Primary | PTEN   | MUT    | 58  | 1042 | 0.05566 | 0.06536 | 5  | 172 | 0.02907 | 0.05563 |
| Unknown Primary | RAF1   | MUT    | 1   | 1042 | 0.00096 | 0.00154 | 0  | 172 | 0.00000 | 0.00261 |
| Unknown Primary | RB1    | HOMDEL | 29  | 1042 | 0.02783 | 0.02298 | 2  | 172 | 0.01163 | 0.01896 |
| Unknown Primary | RB1    | MUT    | 66  | 1042 | 0.06334 | 0.04053 | 11 | 172 | 0.06395 | 0.04092 |
| Unknown Primary | RET    | FUSION | 0   | 1042 | 0.00000 | 0.00219 | 0  | 172 | 0.00000 | 0.00281 |
| Unknown Primary | RET    | MUT    | 0   | 1042 | 0.00000 | 0.00175 | 2  | 172 | 0.01163 | 0.00213 |
| Unknown Primary | RIT1   | MUT    | 2   | 1042 | 0.00192 | 0.00105 | 0  | 172 | 0.00000 | 0.00126 |
| Unknown Primary | ROS1   | FUSION | 0   | 1042 | 0.00000 | 0.00149 | 1  | 172 | 0.00581 | 0.00358 |
| Unknown Primary | ROS1   | MUT    | 0   | 1042 | 0.00000 | 0.00009 | 0  | 172 | 0.00000 | 0.00019 |
| Unknown Primary | SF3B1  | MUT    | 7   | 1042 | 0.00672 | 0.00807 | 1  | 172 | 0.00581 | 0.00803 |
| Unknown Primary | SMO    | MUT    | 0   | 1042 | 0.00000 | 0.00013 | 0  | 172 | 0.00000 | 0.00039 |
| Unknown Primary | SPOP   | MUT    | 0   | 1042 | 0.00000 | 0.00355 | 3  | 172 | 0.01744 | 0.00793 |
| Unknown Primary | TERT   | FUSION | 0   | 1042 | 0.00000 | 0.00009 | 0  | 172 | 0.00000 | 0.00000 |
| Unknown Primary | TERT   | MUT    | 98  | 1042 | 0.09405 | 0.09795 | 12 | 172 | 0.06977 | 0.12307 |
| Unknown Primary | TP53   | HOMDEL | 9   | 1042 | 0.00864 | 0.01276 | 0  | 172 | 0.00000 | 0.00900 |
| Unknown Primary | TP53   | MUT    | 585 | 1042 | 0.56142 | 0.52404 | 80 | 172 | 0.46512 | 0.41428 |

Prioritized biomarker frequencies in this PCR-CGP cohort are compared to those in the Memorial Sloan Kettering (MSK)-IMPACT pan-solid tumor, hybrid capture based CGP cohort of 10,917 clinical tumor samples. For each tumor type with  $\geq 50$  samples in each cohort, biomarker frequencies were determined per genes and variant class: MUT (mutations [SNVs and indels], HOMDEL (deep deletions), AMP (amplification), and FUSION (gene fusions). Per cohort, the number of samples per tumor type with the indicated variant (Variant  $n$ ), the total number of samples in that tumor type (Sample  $n$ ), the variant frequency in the cancer type (Cancer Type Freq), and the overall variant frequency (Overall Freq) are shown. To facilitate comparison, several PCR-CGP tumor types were combined in this analysis ('Biliary\_Liver': Biliary and Liver, and 'Esophagus\_Stomach': Esophagus and Stomach). Samples with multiple reported variants in a single gene + biomarker category were only counted once in corresponding frequency calculations. See **Methods** for additional details.

**Supplementary Table 8. PCR-CGP vs. MSK-IMPACT Biomarker Frequency Correlations**

| Cancer Type       | Sample Number |              | Pearson <i>r</i> |
|-------------------|---------------|--------------|------------------|
|                   | PCR-CGP       | MSK-IMPACT   |                  |
| Biliary_Liver     | 558           | 343          | 0.932            |
| Bladder           | 614           | 402          | 0.961            |
| Brain             | 1,203         | 513          | 0.987            |
| Breast            | 2,659         | 1,228        | 0.990            |
| Colon and Rectum  | 3,020         | 1,053        | 0.999            |
| Endometrium       | 919           | 210          | 0.982            |
| Esophagus_Stomach | 994           | 315          | 0.972            |
| Head and Neck     | 746           | 282          | 0.957            |
| Kidney            | 510           | 322          | 0.897            |
| Lung - NSCLC      | 2,784         | 1,539        | 0.980            |
| Lung - SCLC       | 433           | 81           | 0.990            |
| Lymphoma          | 182           | 171          | 0.941            |
| Melanoma          | 697           | 349          | 0.982            |
| Non-Melanoma Skin | 132           | 141          | 0.986            |
| Ovary             | 1,484         | 215          | 0.996            |
| Pancreas          | 1,080         | 419          | 0.983            |
| Prostate          | 1,283         | 621          | 0.969            |
| Sarcoma           | 764           | 673          | 0.939            |
| Thyroid           | 249           | 221          | 0.983            |
| Unknown Primary   | 1,042         | 172          | 0.975            |
| <b>Overall</b>    | <b>21,353</b> | <b>9,270</b> | <b>0.990</b>     |

Prioritized biomarker frequencies in this PCR-CGP cohort are compared to those in the Memorial Sloan Kettering (MSK)-IMPACT pan-solid tumor, hybrid capture based CGP cohort. For each tumor type with  $\geq 50$  samples in each cohort, biomarker rates were determined per genes and variant class as shown in **Supplementary Table 7**. For each indicated tumor type, the total sample number per cohort, along with the Pearson correlation (*r*) of all included biomarker rates are shown. The overall sample number of included samples for both cohorts and the overall correlation of all biomarkers is also shown.

**Supplementary Table 9. Informative PCR-CGP for Prostate Cancer**

| Specimen           |                              | Prostate Cancer |               | PCR-CGP Results |              |                        |              |
|--------------------|------------------------------|-----------------|---------------|-----------------|--------------|------------------------|--------------|
| Requirement Status | Attribute                    | n               | %             | Informative     |              | Informative (Positive) |              |
|                    |                              |                 |               | n               | %            | n                      | %            |
| <b>Pass</b>        | Large (>25mm <sup>2</sup> )  | 275             | 20.5%         | 266             | 96.7%        | 37                     | 13.5%        |
|                    | Small (2-25mm <sup>2</sup> ) | 617             | 45.9%         | 588             | 95.3%        | 95                     | 15.4%        |
|                    | <b>Subtotal</b>              | <b>892</b>      | <b>66.4%</b>  | <b>854</b>      | <b>95.7%</b> | <b>132</b>             | <b>14.8%</b> |
| <b>Exception</b>   | TC < 20%                     | 88              | 6.5%          | 6               | 6.8%         | 6                      | 6.8%         |
|                    | TSA < 2mm <sup>2</sup>       | 61              | 4.5%          | 8               | 13.1%        | 8                      | 13.1%        |
|                    | Age > 5 years                | 145             | 10.8%         | 100             | 69.0%        | 14                     | 9.7%         |
|                    | DNA/RNA < 1ng/uL             | 158             | 11.8%         | 115             | 72.8%        | 28                     | 17.7%        |
|                    | <b>Subtotal</b>              | <b>452</b>      | <b>33.6%</b>  | <b>229</b>      | <b>50.7%</b> | <b>56</b>              | <b>12.4%</b> |
| <b>Total</b>       |                              | <b>1,344</b>    | <b>100.0%</b> | <b>1,083</b>    | <b>80.6%</b> | <b>853</b>             | <b>87.8%</b> |

This table summarizes overall sample characteristics and informative test reports in 1,344 consecutive prostate cancer samples tested by the current StrataNGS PCR-CGP test version. Sample requirement status indicates whether a given sample met all minimum PCR-CGP test requirements ('Pass': tumor surface area (TSA) >= 2mm<sup>2</sup>, tumor content (TC) >= 20%, sample age <= 5 years, and DNA & RNA concentration >= 1ng/uL), or failed to meet at least one of these requirements ('Exception'). Here, PCR-CGP results were only considered Informative if the sample had at least one positive actionable biomarker result (microsatellite instable high (MSI-H) or deleterious mutation/copy number deep deletion in *MSH2/6*, *BRCA1/2* or *ATM*, OR the sample passed all sequencing quality control QC metrics and had >=20% TC. 'Informative (Positive)' results indicate that the sample contained at least one positive actionable biomarker result.



**Supplementary Table 10: Informative PCR-CGP for NSCLC Adenocarcinoma**

| Specimen           |                              | NSCLC        |               | PCR-CGP Results |              |                        |              |
|--------------------|------------------------------|--------------|---------------|-----------------|--------------|------------------------|--------------|
| Requirement Status | Attribute                    | n            | %             | Informative     |              | Informative (Positive) |              |
|                    |                              |              |               | n               | %            | n                      | %            |
| <b>Pass</b>        | Large (>25mm <sup>2</sup> )  | 194          | 17.0%         | 190             | 97.9%        | 153                    | 78.9%        |
|                    | Small (2-25mm <sup>2</sup> ) | 484          | 42.3%         | 476             | 98.3%        | 383                    | 79.1%        |
|                    | <b>Subtotal</b>              | <b>678</b>   | <b>59.3%</b>  | <b>666</b>      | <b>98.2%</b> | <b>536</b>             | <b>79.1%</b> |
| <b>Exception</b>   | TC < 20%                     | 249          | 21.8%         | 144             | 57.8%        | 144                    | 57.8%        |
|                    | TSA < 2mm <sup>2</sup>       | 138          | 12.1%         | 125             | 90.6%        | 109                    | 79.0%        |
|                    | Age > 5 years                | 10           | 0.9%          | 8               | 80.0%        | 8                      | 80.0%        |
|                    | DNA/RNA < 1ng/uL             | 69           | 6.0%          | 61              | 88.4%        | 56                     | 81.2%        |
|                    | <b>Subtotal</b>              | <b>466</b>   | <b>40.7%</b>  | <b>338</b>      | <b>72.5%</b> | <b>317</b>             | <b>68.0%</b> |
| <b>Total</b>       |                              | <b>1,144</b> | <b>100.0%</b> | <b>1,004</b>    | <b>87.8%</b> | <b>853</b>             | <b>74.6%</b> |

This table summarizes overall sample characteristics and informative test reports in 1,144 consecutive non-small cell lung cancer (NSCLC) tissue specimens tested by the current StrataNGS PCR-CGP test version when NSCLC subtype (adenocarcinoma) was prospectively determined at the time of histopathologic review. Sample requirement status indicates whether a given sample met all minimum PCR-CGP test requirements ('Pass': tumor surface area (TSA) >= 2mm<sup>2</sup>, tumor content (TC) >= 20%, sample age <= 5 years, and DNA & RNA concentration >= 1ng/uL), or failed to meet at least one of these requirements ('Exception'). Here, PCR-CGP results were only considered Informative if the sample had at least one positive therapy informative/actionable biomarker result (see **Supplementary Table 2**) OR the sample passed all sequencing quality control (QC) metrics and had >=20% TC. 'Informative (Positive)' results indicate that the sample contained at least one positive therapy informative/actionable biomarker result.
